# Supplementary material for: Utopia for Norwegian helicopter emergency medical services: Estimating the number of bases needed to radically bring down response times, and lives needed to be saved for cost effectiveness
Source: PLoS One. 2023 Mar 30;18(3):e0281706. doi: 10.1371/journal.pone.0281706 (PMC10062538; doi:10.1371/journal.pone.0281706)
Supplement: S2 Data — (CSV) [file pone.0281706.s002.csv]

5.5	20.41975203092882	11.852930004104113	13.18969534513832	12.554458750653302	11.036266586792046	17.31537279915232	25.29644973321269	21.788544344755792	21.21629157199095	20.04325698046287	18.474249089691078	16.913990157334077	14.189152717111613	16.275393641977335	19.05705392944237	18.765617229536144	22.158132796815824	22.475034655368116	25.952336310539035	25.050473992235936	25.864494042970144	29.590393244727455	27.898295168369582	32.930344282664365	31.46642173002657	27.70482178330563	32.434480331870375	29.87998748251516	30.452744446673076	25.8228347968863	30.847333712539807	31.989611606436576	34.521324472320515	35.060645131872505	36.43013216474455	36.114770826864564	41.73204596834561	39.19556421381677	45.51744593280426	31.394666158752994	39.79322804975724	56.946845523721294	60.10074594161621	57.061809185634445	54.21661740028646	44.924240062612654	39.770752667804956	33.95353974902652	47.22317196325689
20.41975203092882	5.5	14.14853527258837	13.369006311855859	17.685350418527488	22.784564230994114	20.7961154257505	25.323774335195782	17.57684674214549	13.8353614205874	14.438623011198137	16.346103432166068	13.243496956154694	16.323150079911677	9.741572779650404	7.090705464376768	8.83316456033842	12.828466481308492	9.2657807798293	14.918432765172193	13.195178213318119	12.617294411481845	17.005282252132638	16.48984336078419	20.07823293580224	17.792768438472137	23.39772375220598	24.55120731318182	21.95135368506607	21.420766640332584	17.59166034748393	20.99715970123701	22.651628521825	24.09809179227647	25.600614418927368	27.983062825540774	29.490234535540935	33.235367732383516	29.679818276022846	35.95837171101782	20.036850489763758	36.81064016233205	47.58202475518146	49.92422146432047	48.63137908745674	45.33312880114887	38.26290095576592	34.55461515607396	33.323117353954046	43.05341122366269
11.852930004104113	14.14853527258837	5.5	8.662013612022948	12.324890991200123	14.556531212486442	15.928915381609599	23.114876709001766	17.46769314803651	15.775517647862161	14.943532962155322	14.387468792018135	11.65149023826776	10.955708048170905	10.2014353139555	12.893938624449138	12.45570031338029	16.356669019219982	16.151916163381614	20.05406365823369	18.964423645576765	19.60397659227788	23.496713811374736	21.995571761052105	26.83327816278608	25.211443711248037	23.90655806000114	27.635967049236402	24.967034324348532	25.235594929629297	20.599340422507503	25.416444003133908	26.737536033118303	29.031729963457572	29.856900541742824	31.569221351759293	31.8496187038221	36.96158997083339	34.05937313917526	40.45847314762059	25.597367223205314	36.984211407147185	52.05480392529687	54.960199464171204	52.48836594859185	49.465386832492314	40.83410467506615	36.104246243914474	31.93881984623326	44.09594811575229
13.18969534513832	13.369006311855859	8.662013612022948	5.5	10.250262464684646	17.150520774938816	19.06428734792696	26.05829216102184	19.87434855333738	17.531287179231246	17.025261522327632	17.036040186356395	13.89565316162515	14.029158631160817	9.175318671434212	11.830439283101885	12.968602435458669	17.688807994124097	16.31152762145075	21.095704287179228	19.730512849676252	19.908960766477122	24.119642890468562	22.973236766134832	27.388138851958153	25.406958508647765	26.371848541346516	29.52474728128092	26.826262415758247	26.864049082964485	22.33647873870889	26.856063453959507	28.30991775033307	30.35537592588209	31.421419379257582	33.36415820828242	33.99099761844235	38.76340479769821	35.62861300669776	42.03337103909386	26.63751830040574	39.65780841307602	53.68864636370144	56.40060883704818	54.32548260471996	51.204229040904394	42.99028221763301	38.48248580208905	34.84167211052292	46.63134464594055
12.554458750653302	17.685350418527488	12.324890991200123	10.250262464684646	5.5	17.901100941619966	22.210322377959336	29.776877548789184	24.258946769424867	22.201381932273843	21.57969436372132	21.212297872123024	18.344085970547482	17.57879033935797	13.739175075311936	16.095300436225898	17.701875847824418	22.430499216336482	20.925477262444755	25.84101040063336	24.450150627327414	24.520797158388103	28.79202623088779	27.710433152396714	32.0287169850626	29.93152233670174	30.72073205084576	34.188855635498754	31.495413546611832	31.586185359204205	27.028837569060432	31.600575287465023	33.04195866521094	35.10558647273374	36.15682703614521	38.05874329081494	38.55865117058766	43.460197891961904	40.36572031815117	46.77215367735354	31.37579684598288	43.79387913835452	58.4229501504766	61.15035468101849	59.019618529356144	55.920347376803626	47.556464064331465	42.90667264701698	38.61756141622132	50.92083378405739
11.036266586792046	22.784564230994114	14.556531212486442	17.150520774938816	17.901100941619966	5.5	13.63688375047335	21.306675402258136	19.913861408007435	20.70844081241361	19.2450057433724	16.862233161636233	16.85252850973942	13.14274611894922	19.200535956218552	21.74957169044314	20.242533855135424	22.10622367683976	23.773202003496966	25.814711895654792	25.374029218634977	26.685398686854214	29.731359653303475	27.67151094143531	32.97473662028282	32.0728454569018	24.85037042684138	30.387247352567595	28.072577985644546	29.006992143792726	24.62997393852882	29.687311919801047	30.530456357048777	33.32392294511767	33.434087258351866	34.3304669840829	33.37742630053332	39.40560390068689	37.372601398785925	43.4762581648823	30.82170040236065	35.77022599227763	54.562778852260394	58.00367069921551	54.31598034538354	51.69405722874462	41.83829563912676	36.399496046649446	29.54364638792863	43.31720476720742
17.31537279915232	20.7961154257505	15.928915381609599	19.06428734792696	22.210322377959336	13.63688375047335	5.5	13.483236404962405	12.688388390927397	15.034863435388681	13.508109608004316	10.689679035160705	13.07073224216586	10.59929326082532	18.924460626525097	20.47611022952958	17.509675316463667	16.778647484914046	20.025920409907123	19.89237599787716	20.071701018963463	21.885391883092254	23.823630839427775	21.48743161589433	26.780927302393145	26.569529924035642	16.749039438191687	22.531522158874502	20.40832654970059	21.575891248260188	17.644696293897365	22.464042498734923	23.043173245669283	25.9607158143124	25.76972179420536	26.402356996788217	25.262256642388984	31.363857555370437	29.54612518394098	35.51294927656771	24.0891804707754	27.99931986756664	46.47406442864117	49.98081031306616	46.1818928072825	43.58409396210732	33.707816363034695	28.30841089513335	22.178723447855212	35.47170365459992
25.29644973321269	25.323774335195782	23.114876709001766	26.05829216102184	29.776877548789184	21.306675402258136	13.483236404962405	5.5	13.392435109530858	17.28727949516994	16.39793340069206	14.82510908048915	18.254447108384674	17.704919990876988	24.905599643547394	25.58591254382294	22.097171902728498	18.853141889002977	23.108064594885786	20.18949016591704	21.268123481007535	23.384551098885623	23.389451046904952	20.99319228072644	25.472138487452675	26.390637810382827	11.348934205768012	17.68550069395165	16.616143745507543	18.315794192624615	16.49710343126482	19.619249971175396	19.39483286335361	22.31105208386418	21.280163052791877	20.91030724422935	18.71647970630082	25.12429869064846	24.264169949075	29.51647134717917	22.112975202646172	20.02823741852587	39.74907501599205	43.541578282497156	39.06573707926418	36.74256183370541	26.388803931153582	20.768268444578872	14.34073163105653	27.53516351193527
21.788544344755792	17.57684674214549	17.46769314803651	19.87434855333738	24.258946769424867	19.913861408007435	12.688388390927397	13.392435109530858	5.5	9.395111681217777	8.695330667934494	8.814585539198006	11.479202706108506	13.100016310206852	17.8593048412676	18.02602787443237	14.487287372932911	10.998020231781982	15.216951626355081	13.101341190213562	13.755939066047578	15.815640454214812	16.882813828388933	14.475265206915198	19.680139580777684	19.76461936733798	11.997759624900295	16.170743176657794	13.706914053909458	14.598768991526272	10.456399156138998	15.358257535728583	16.117694438182582	18.943958936620227	19.038752082602908	20.16598155644985	19.956305945850247	25.444188146494177	23.053897533365053	29.29275408010553	16.90217397987686	25.390588503993204	40.661622171390235	43.87766958365004	40.80949202418773	37.93024707209139	28.90467700054549	24.148374853391612	21.288439306752274	32.25915329441685
21.21629157199095	13.8353614205874	15.775517647862161	17.531287179231246	22.201381932273843	20.70844081241361	15.034863435388681	17.28727949516994	9.395111681217777	5.5	7.052369979069518	9.864683111385336	9.805955621344609	13.105473615290531	14.850835443210215	14.480132193101587	10.999566110220224	7.277317922595792	11.326770708525938	10.621811144923495	10.539871316888636	12.386319611777639	14.576310295556118	12.463698081079322	17.773180827564552	17.139498811254924	15.12352636233526	17.494328145186206	14.79716717894984	14.960795022443811	10.339188329653648	15.181991793711019	16.46273693683463	18.83611569645163	19.581488198556965	21.360789820447295	22.03136784142675	26.762314152545017	23.784184186773803	30.18508407887847	15.74731776795059	28.608324896147575	41.79491879494687	44.68747381313915	42.31920040562162	39.24059876062978	31.014354776244776	26.758091224518072	24.999846467032956	35.12869985842792
20.04325698046287	14.438623011198137	14.943532962155322	17.025261522327632	21.57969436372132	19.2450057433724	13.508109608004316	16.39793340069206	8.695330667934494	7.052369979069518	5.5	8.323584020736135	8.796617808523205	11.701553539454917	14.737686020054124	14.833862538399554	11.296418416600133	8.770551565358277	12.449577047114522	12.14202310458466	12.083174117064974	13.881778278274437	16.10589339472759	13.943561316212428	19.27267320135404	18.691098256949275	15.017418372248441	18.1941845006795	15.534273367112085	15.932303369289254	11.285879562880341	16.309336783940857	17.46308074255686	19.98692391438525	20.55632384401048	22.140063254957113	22.48250388693803	27.525422940678116	24.72867446503176	31.101803215308443	17.111836925899844	28.495720595655136	42.653452433823915	45.65436842404682	43.04503095258826	40.03462731631744	31.482306977095206	26.985189682451576	24.480240871939056	35.23360256586591
18.474249089691078	16.346103432166068	14.387468792018135	17.036040186356395	21.212297872123024	16.862233161636233	10.689679035160705	14.82510908048915	8.814585539198006	9.864683111385336	8.323584020736135	5.5	8.929380338458714	9.786748511004767	15.582508407754277	16.38936923623764	13.021400169812056	11.59208195241191	14.992058476624166	14.85889569608497	14.903715365749287	16.69573634062447	18.82369872381056	16.57482000607967	21.913178334470572	21.47720606277892	15.049915223652048	19.47280362919854	16.96566478283941	17.72159076637733	13.268951599730174	18.33606202016638	19.258039488134116	21.98914264716075	22.24888155287533	23.46929698459772	23.230802648758665	28.7579423737751	26.313749283156795	32.58399060425512	19.514110186574385	28.135669551952304	43.974218993261566	47.17073201857343	44.116904606988804	41.24473118494517	32.1459757667845	27.26097681773599	23.424931802855962	35.20858649180591
16.913990157334077	13.243496956154694	11.65149023826776	13.89565316162515	18.344085970547482	16.85252850973942	13.07073224216586	18.254447108384674	11.479202706108506	9.805955621344609	8.796617808523205	8.929380338458714	5.5	9.27310707310523	12.156250840831326	13.080283400241651	9.939624745906553	10.858691167673534	12.75973762761787	14.655477347719858	14.038929228651453	15.357426023765719	18.47433322492803	16.580824550006476	21.774562676757522	20.724591215868593	17.976961292525313	21.490420137605888	18.830174606906596	19.181116642246803	14.528462444756084	19.474407223764825	20.70238752658093	23.13664856323503	23.809402299158712	25.435710014641725	25.723320340770414	30.822009139262516	27.99519149167365	34.378706056522105	20.00186865771902	31.31788958149675	45.943994596335564	48.91792537890653	46.339763650279686	43.330851181670084	34.71739833509963	30.100429593118644	26.81540552043155	38.23803148826136
14.189152717111613	16.323150079911677	10.955708048170905	14.029158631160817	17.57879033935797	13.14274611894922	10.59929326082532	17.704919990876988	13.100016310206852	13.105473615290531	11.701553539454917	9.786748511004767	9.27310707310523	5.5	13.913828585205147	15.740536387527843	13.259181648985999	14.463540477782814	16.460320662677603	18.186897156922893	17.740063227627452	19.126604108424374	22.09104159257314	20.06342905453866	25.346276358070753	24.445241720360073	19.141537640821564	23.7571315084089	21.23083577429239	21.905031327477683	17.34201008692029	22.419359077038735	23.445248564213887	26.095161126500017	26.47526795184078	27.753682463709396	27.462936565406633	33.04417952209649	30.57075732854891	36.86068207439787	23.311870770626985	31.805793362605137	48.26092961956995	51.447449189397354	48.38419268559755	45.527604384661444	36.33123412667043	31.3155222796057	26.54372150944278	39.060087640182594
16.275393641977335	9.741572779650404	10.2014353139555	9.175318671434212	13.739175075311936	19.200535956218552	18.924460626525097	24.905599643547394	17.8593048412676	14.850835443210215	14.737686020054124	15.582508407754277	12.156250840831326	13.913828585205147	5.5	8.286454265140296	9.637774525200527	14.625190141167396	12.688366421940875	17.746269019546073	16.265458202860472	16.2861693806699	20.556244665530436	19.563887790439495	23.790173389005364	21.74642118196861	24.253809003265406	26.67505428321347	23.982636080235	23.82132488946307	19.463035639158775	23.674315856022034	25.207969263091986	27.069312673372593	28.286696164734447	30.396063535357538	31.35574228646236	35.768514127090874	32.47093060288299	38.852465342332565	23.224466479500183	37.73077048193207	50.51860187013182	53.10181685598464	51.30881825755492	48.116393193435016	40.314918643804255	36.10226424676141	33.45306195999889	44.432905528973656
19.05705392944237	7.090705464376768	12.893938624449138	11.830439283101885	16.095300436225898	21.74957169044314	20.47611022952958	25.58591254382294	18.02602787443237	14.480132193101587	14.833862538399554	16.38936923623764	13.080283400241651	15.740536387527843	8.286454265140296	5.5	9.038996610604219	13.734526409097006	10.669020901316976	16.214055595546704	14.549370984434384	14.138411960614789	18.515375250280503	17.871605388522823	21.627964187770456	19.376898455651926	24.10364112102672	25.68283397138029	23.04261478267285	22.62579586703567	18.600016192383166	22.28419862923378	23.90893194523382	25.478392261010885	26.904609927369073	29.212835810148793	30.55557860879621	34.50961326039855	31.02130529470491	37.33515001307997	21.464736018082554	37.583206789229656	48.977423336460106	51.379366560194214	49.95927195579946	46.68751073776647	39.401832429573794	35.529783568960966	33.81386629268623	43.98726763730474
18.765617229536144	8.83316456033842	12.45570031338029	12.968602435458669	17.701875847824418	20.242533855135424	17.509675316463667	22.097171902728498	14.487287372932911	10.999566110220224	11.296418416600133	13.021400169812056	9.939624745906553	13.259181648985999	9.637774525200527	9.038996610604219	5.5	10.518948242306289	9.21110200169022	13.64954814375407	12.266062413803775	12.661875530193377	16.706957153552885	15.50855902056379	20.013702995446536	18.264806458176693	20.607666309154826	22.587103404566644	19.90436194339484	19.69088616274474	15.394889095420398	19.53813218462495	21.070961687802985	22.95508685440106	24.149052070279268	26.272567087715245	27.33900583467061	31.63810998415338	28.334823023386967	34.719585508803334	19.17396444886308	34.1021443294614	46.38571662772744	48.9987406437015	47.17357371024517	43.97862092445786	36.26495480248964	32.197478832250724	30.27548931830862	40.60654716945902
22.158132796815824	12.828466481308492	16.356669019219982	17.688807994124097	22.430499216336482	22.10622367683976	16.778647484914046	18.853141889002977	10.998020231781982	7.277317922595792	8.770551565358277	11.59208195241191	10.858691167673534	14.463540477782814	14.625190141167396	13.734526409097006	10.518948242306289	5.5	9.819947487124065	9.305165280809863	8.849973501816546	10.616280338594432	13.133562726433171	11.24435394261565	16.41874231856655	15.53610239231016	16.129781307150402	17.568294727974813	14.887966479270911	14.70997711695553	10.389598165062406	14.671080749061609	16.129600026635806	18.218096161799988	19.235275102295	21.272616471842348	22.350948321526534	26.651775850166334	23.4406834623741	29.84465045492059	14.764047014930863	29.487781046105525	41.501700859553864	44.23638120385055	42.20284360830697	39.04073845034474	31.254405569121225	27.295520096523767	26.261188255479535	35.76266937034476
22.475034655368116	9.2657807798293	16.151916163381614	16.31152762145075	20.925477262444755	23.773202003496966	20.025920409907123	23.108064594885786	15.216951626355081	11.326770708525938	12.449577047114522	14.992058476624166	12.75973762761787	16.460320662677603	12.688366421940875	10.669020901316976	9.21110200169022	9.819947487124065	5.5	11.174865428564747	9.431221646004364	9.099186338632816	13.40006730043466	12.726468302215938	16.603700335940196	14.632718826010972	20.362739305959693	20.904436241218825	18.35781859048255	17.718733985514113	14.154650836740808	17.24558901938996	18.912454494507987	20.336289515865545	21.8406230456547	24.253738711791808	25.896682506787947	29.482359052191587	25.914053423638325	32.19685610317829	16.297535707704817	33.57128722234825	43.82706554676455	46.21037793930705	44.86584873957895	41.56815097179474	34.588193253536446	31.050122278740282	30.56631884101729	39.582257025983445
25.952336310539035	14.918432765172193	20.05406365823369	21.095704287179228	25.84101040063336	25.814711895654792	19.89237599787716	20.18949016591704	13.101341190213562	10.621811144923495	12.14202310458466	14.85889569608497	14.655477347719858	18.186897156922893	17.746269019546073	16.214055595546704	13.64954814375407	9.305165280809863	11.174865428564747	5.5	7.302272899207063	9.091288198173665	9.467468059326325	7.448111957068037	12.660282828537206	12.195860189773228	16.018148209881286	15.318105165599064	12.891777936585697	12.070142870597923	9.406320300920298	11.579620483938324	13.237740388785792	14.82807691003583	16.19257424839235	18.579502826420146	20.36257335192908	23.817353214599844	20.312606592125945	26.652597427223526	11.062567709565421	28.52983433098669	38.311760128182975	40.85621866882536	39.24522883324737	35.98114577989027	28.94441683589644	25.62022398068677	26.37175476385471	34.16939979604779
25.050473992235936	13.195178213318119	18.964423645576765	19.730512849676252	24.450150627327414	25.374029218634977	20.071701018963463	21.268123481007535	13.755939066047578	10.539871316888636	12.083174117064974	14.903715365749287	14.038929228651453	17.740063227627452	16.265458202860472	14.549370984434384	12.266062413803775	8.849973501816546	9.431221646004364	7.302272899207063	5.5	7.619075332466859	10.042268055798235	8.828169686690678	13.383454610175848	12.208321560335541	17.506268708568932	17.120299929215495	14.67791631490598	13.867833457775498	10.917858305173807	13.323722992896139	15.00422767565012	16.42917199654945	17.910236197088217	20.352011347036118	22.16282010233434	25.555908399958717	21.986801899491287	28.28614992191943	12.466887178434535	30.24770429087834	39.92893169697203	42.381359303298375	40.936791167047765	37.64631870150229	30.739108562452937	27.410291189475746	27.868406177797315	35.95914971044921
25.864494042970144	12.617294411481845	19.60397659227788	19.908960766477122	24.520797158388103	26.685398686854214	21.885391883092254	23.384551098885623	15.815640454214812	12.386319611777639	13.881778278274437	16.69573634062447	15.357426023765719	19.126604108424374	16.2861693806699	14.138411960614789	12.661875530193377	10.616280338594432	9.099186338632816	9.091288198173665	7.619075332466859	5.5	9.889512890998283	9.852521649734587	13.015213764807571	11.107765045820702	19.55813278864231	18.65646203916244	16.373922906707847	15.336830796101339	12.943186731727156	14.561271836864828	16.282976548663317	17.238607584660286	18.979468911319884	21.596038460148826	23.72410937001977	26.630511907769836	22.89010033934024	29.043381086600174	13.078543278131452	32.09435047992788	40.60554801434677	42.84513030578292	41.81070676148827	38.45208469771439	32.08000884068944	29.047826180485515	29.92171738165013	37.589453519737006
29.590393244727455	17.005282252132638	23.496713811374736	24.119642890468562	28.79202623088779	29.731359653303475	23.823630839427775	23.389451046904952	16.882813828388933	14.576310295556118	16.10589339472759	18.82369872381056	18.47433322492803	22.09104159257314	20.556244665530436	18.515375250280503	16.706957153552885	13.133562726433171	13.40006730043466	9.467468059326325	10.042268055798235	9.889512890998283	5.5	7.938392192786292	8.841186556713133	8.501201891861122	18.485898212870225	15.696501848194659	14.007736960307057	12.483674017731815	12.420488907945964	11.304984732532443	12.938439350716411	13.172152803295191	15.162761243296421	17.9591429233829	20.632182212987033	22.687154843633703	18.808826038554233	24.806577931013138	9.024860034134655	29.647114140544026	36.301418625278785	38.471352153987944	37.61918668041429	34.220997150694785	28.44632597453237	26.032477177442377	28.53660128332722	34.46788984497757
27.898295168369582	16.48984336078419	21.995571761052105	22.973236766134832	27.710433152396714	27.67151094143531	21.48743161589433	20.99319228072644	14.475265206915198	12.463698081079322	13.943561316212428	16.57482000607967	16.580824550006476	20.06342905453866	19.563887790439495	17.871605388522823	15.50855902056379	11.24435394261565	12.726468302215938	7.448111957068037	8.828169686690678	9.852521649734587	7.938392192786292	5.5	10.839574369153013	10.918645575658793	16.26245139355031	14.362069180074162	12.251443349097439	11.033597835532646	10.00178435364261	10.2093442365206	11.930561295479945	13.1102057070079	14.686042824332429	17.25167788139459	19.42302927274791	22.34657105837528	18.700064583711573	24.970614047798396	9.165560382177324	28.04447555486756	36.606168911969064	39.05759508434239	37.65333048571648	34.34394642295041	27.7283052573428	24.779596418402658	26.467723978119977	33.305281037212666
32.930344282664365	20.07823293580224	26.83327816278608	27.388138851958153	32.0287169850626	32.97473662028282	26.780927302393145	25.472138487452675	19.680139580777684	17.773180827564552	19.27267320135404	21.913178334470572	21.774562676757522	25.346276358070753	23.790173389005364	21.627964187770456	20.013702995446536	16.41874231856655	16.603700335940196	12.660282828537206	13.383454610175848	13.015213764807571	8.841186556713133	10.839574369153013	5.5	8.478504166748987	20.093781149017993	15.866103199371418	14.986844781014787	13.212271656162846	14.87384490297711	11.808579830281916	12.97815275062391	11.874560123176673	14.165849448751278	17.053994070824466	20.316189577425583	21.093049563757795	17.067608128324125	22.56877520726267	8.992834850040103	29.744851412133126	33.80202921839903	35.70826557092039	35.384991613919	31.917183283809845	27.216360876665334	25.62211933489832	29.569342399288658	33.789213243674475
31.46642173002657	17.792768438472137	25.211443711248037	25.406958508647765	29.93152233670174	32.0728454569018	26.569529924035642	26.390637810382827	19.76461936733798	17.139498811254924	18.691098256949275	21.47720606277892	20.724591215868593	24.445241720360073	21.74642118196861	19.376898455651926	18.264806458176693	15.53610239231016	14.632718826010972	12.195860189773228	12.208321560335541	11.107765045820702	8.501201891861122	10.918645575658793	8.478504166748987	5.5	21.43540576335147	18.122769798730623	16.750471997799487	15.100983654841153	15.415943423208834	13.787560947070709	15.24841356934757	14.674390730285817	16.907405726579306	19.794937167380965	22.84977850537309	24.030264096641123	20.01648145042764	25.539927344882024	11.065034917258421	32.117403272694645	36.71578334102544	38.51627917498306	38.348751782046676	34.87353029796164	30.09203277682421	28.220036584086465	31.373997443431428	36.50975226098686
27.70482178330563	23.39772375220598	23.90655806000114	26.371848541346516	30.72073205084576	24.85037042684138	16.749039438191687	11.348934205768012	11.997759624900295	15.12352636233526	15.017418372248441	15.049915223652048	17.976961292525313	19.141537640821564	24.253809003265406	24.10364112102672	20.607666309154826	16.129781307150402	20.362739305959693	16.018148209881286	17.506268708568932	19.55813278864231	18.485898212870225	16.26245139355031	20.093781149017993	21.43540576335147	5.5	11.893012359739664	10.845330979228574	12.606057354615888	12.118235765717866	13.969895559216253	13.577693425201861	16.46876852567685	15.467751471557763	15.404182550789926	14.030049806462122	20.142422038479296	18.701205847911112	24.373117917549003	16.632695575144716	19.000058876031588	35.225123973520496	38.758396024003844	35.00144034445658	32.343802009780404	22.71948776510994	17.71112094567024	15.864154761206633	25.761885560258133
32.434480331870375	24.55120731318182	27.635967049236402	29.52474728128092	34.188855635498754	30.387247352567595	22.531522158874502	17.68550069395165	16.170743176657794	17.494328145186206	18.1941845006795	19.47280362919854	21.490420137605888	23.7571315084089	26.67505428321347	25.68283397138029	22.587103404566644	17.568294727974813	20.904436241218825	15.318105165599064	17.120299929215495	18.65646203916244	15.696501848194659	14.362069180074162	15.866103199371418	18.122769798730623	11.893012359739664	5.5	8.20009211804567	8.828489228584782	12.716567573778896	9.89370060930053	8.395905222660407	10.534411006212213	9.098311277891689	9.496560683137306	10.567650169393861	14.838345678504497	12.514603365836482	18.629169702522553	12.567965482938488	19.49755789114177	30.02154600816049	33.20967601012078	30.35401629337928	27.35154790028657	19.21962794728075	15.9203165377402	19.456943570062187	24.44372829186774
29.87998748251516	21.95135368506607	24.967034324348532	26.826262415758247	31.495413546611832	28.072577985644546	20.40832654970059	16.616143745507543	13.706914053909458	14.79716717894984	15.534273367112085	16.96566478283941	18.830174606906596	21.23083577429239	23.982636080235	23.04261478267285	19.90436194339484	14.887966479270911	18.35781859048255	12.891777936585697	14.67791631490598	16.373922906707847	14.007736960307057	12.251443349097439	14.986844781014787	16.750471997799487	10.845330979228574	8.20009211804567	5.5	7.296866893705908	10.020208878066637	8.701097560881985	8.309775135043845	11.285129318792428	10.872948801221906	12.10587112009839	13.042586567772467	17.494594782574975	14.84985447074645	21.137470130544955	11.494763296723654	21.293405168696786	32.6298041194005	35.72163241917803	33.03482101457778	30.00078992776502	21.870598826122585	18.232948482993354	20.146079615634527	26.781444636519648
30.452744446673076	21.420766640332584	25.235594929629297	26.864049082964485	31.586185359204205	29.006992143792726	21.575891248260188	18.315794192624615	14.598768991526272	14.960795022443811	15.932303369289254	17.72159076637733	19.181116642246803	21.905031327477683	23.82132488946307	22.62579586703567	19.69088616274474	14.70997711695553	17.718733985514113	12.070142870597923	13.867833457775498	15.336830796101339	12.483674017731815	11.033597835532646	13.212271656162846	15.100983654841153	12.606057354615888	8.828489228584782	7.296866893705908	5.5	10.152861098672364	6.908316006083464	7.040270363904872	9.885683876533122	10.128329241665652	12.093838419823214	13.892299090720902	17.447406960026868	14.323879783951558	20.724681343050683	9.727249385943384	22.66789193361858	32.34731419863414	35.23834483690146	32.993032565899185	29.840828005847946	22.375260443455936	19.247105056820672	21.875656791609085	27.77206178441852
25.8228347968863	17.59166034748393	20.599340422507503	22.33647873870889	27.028837569060432	24.62997393852882	17.644696293897365	16.49710343126482	10.456399156138998	10.339188329653648	11.285879562880341	13.268951599730174	14.528462444756084	17.34201008692029	19.463035639158775	18.600016192383166	15.394889095420398	10.389598165062406	14.154650836740808	9.406320300920298	10.917858305173807	12.943186731727156	12.420488907945964	10.00178435364261	14.87384490297711	15.415943423208834	12.118235765717866	12.716567573778896	10.020208878066637	10.152861098672364	5.5	10.580900380160195	11.678673014960616	14.253523886747544	14.781003768072368	16.530321821891178	17.462928193610434	21.93150870932038	18.96967226349242	25.36167512547421	11.950524856389961	24.94374474262918	36.95899081125312	39.88987025882119	37.49219112274285	34.40221311171361	26.370074628773743	22.462986086355752	22.479660764466693	30.967927128122803
30.847333712539807	20.99715970123701	25.416444003133908	26.856063453959507	31.600575287465023	29.687311919801047	22.464042498734923	19.619249971175396	15.358257535728583	15.181991793711019	16.309336783940857	18.33606202016638	19.474407223764825	22.419359077038735	23.674315856022034	22.28419862923378	19.53813218462495	14.671080749061609	17.24558901938996	11.579620483938324	13.323722992896139	14.561271836864828	11.304984732532443	10.2093442365206	11.808579830281916	13.787560947070709	13.969895559216253	9.89370060930053	8.701097560881985	6.908316006083464	10.580900380160195	5.5	7.222907156749116	9.179022916864634	10.125622944787729	12.551672981077555	14.853304948755584	17.738224508800936	14.296699840861427	20.687085070367488	8.332653924719828	23.873735148688088	32.35163334358949	35.072486055404966	33.18463462159113	29.950734419405514	23.018969825724444	20.249310531175396	23.267913605093327	28.72453285615204
31.989611606436576	22.651628521825	26.737536033118303	28.30991775033307	33.04195866521094	30.530456357048777	23.043173245669283	19.39483286335361	16.117694438182582	16.46273693683463	17.46308074255686	19.258039488134116	20.70238752658093	23.445248564213887	25.207969263091986	23.90893194523382	21.070961687802985	16.129600026635806	18.912454494507987	13.237740388785792	15.00422767565012	16.282976548663317	12.938439350716411	11.930561295479945	12.97815275062391	15.24841356934757	13.577693425201861	8.395905222660407	8.309775135043845	7.040270363904872	11.678673014960616	7.222907156749116	5.5	8.482536862293568	8.62148180816634	10.848895704778668	13.194319674073665	16.102003324298174	12.831021941140305	19.238655085210404	9.68457267364158	22.37100298541006	30.881054677640375	33.7254572485476	31.60540987125217	28.414432187717154	21.29841150749631	18.59461363299841	22.202391397601858	27.040532415328038
34.521324472320515	24.09809179227647	29.031729963457572	30.35537592588209	35.10558647273374	33.32392294511767	25.9607158143124	22.31105208386418	18.943958936620227	18.83611569645163	19.98692391438525	21.98914264716075	23.13664856323503	26.095161126500017	27.069312673372593	25.478392261010885	22.95508685440106	18.218096161799988	20.336289515865545	14.82807691003583	16.42917199654945	17.238607584660286	13.172152803295191	13.1102057070079	11.874560123176673	14.674390730285817	16.46876852567685	10.534411006212213	11.285129318792428	9.885683876533122	14.253523886747544	9.179022916864634	8.482536862293568	5.5	7.8140072333909	10.685503498002108	14.127936503874643	15.019510596897302	11.158215292228622	17.360573218957917	9.683632137673236	23.669319144781777	29.000254608156915	31.547818329984043	30.077565731623825	26.74302695812793	20.929586760186112	19.320774737317308	24.420264954614876	27.41622509592725
35.060645131872505	25.600614418927368	29.856900541742824	31.421419379257582	36.15682703614521	33.434087258351866	25.76972179420536	21.280163052791877	19.038752082602908	19.581488198556965	20.55632384401048	22.24888155287533	23.809402299158712	26.47526795184078	28.286696164734447	26.904609927369073	24.149052070279268	19.235275102295	21.8406230456547	16.19257424839235	17.910236197088217	18.979468911319884	15.162761243296421	14.686042824332429	14.165849448751278	16.907405726579306	15.467751471557763	9.098311277891689	10.872948801221906	10.128329241665652	14.781003768072368	10.125622944787729	8.62148180816634	7.8140072333909	5.5	8.391684803560468	11.851968718655446	13.160535780889921	9.710481673945711	16.11851016481928	11.640616351634524	21.404535811289115	27.767227307820338	30.61048492453617	28.559337795335974	25.33063533608705	18.789958248032363	17.00730303542354	22.50454262338209	25.126953778112433
36.43013216474455	27.983062825540774	31.569221351759293	33.36415820828242	38.05874329081494	34.3304669840829	26.402356996788217	20.91030724422935	20.16598155644985	21.360789820447295	22.140063254957113	23.46929698459772	25.435710014641725	27.753682463709396	30.396063535357538	29.212835810148793	26.272567087715245	21.272616471842348	24.253738711791808	18.579502826420146	20.352011347036118	21.596038460148826	17.9591429233829	17.25167788139459	17.053994070824466	19.794937167380965	15.404182550789926	9.496560683137306	12.10587112009839	12.093838419823214	16.530321821891178	12.551672981077555	10.848895704778668	10.685503498002108	8.391684803560468	5.5	9.336872734176389	10.901612817176817	8.859390518928633	14.65072803222835	14.45803096739162	18.78669792705994	26.033769802355778	29.220665761580925	26.462012295882175	23.396296276331025	16.008353584230253	14.192930189318146	20.655959716570926	22.236134123039346
36.114770826864564	29.490234535540935	31.8496187038221	33.99099761844235	38.55865117058766	33.37742630053332	25.262256642388984	18.71647970630082	19.956305945850247	22.03136784142675	22.48250388693803	23.230802648758665	25.723320340770414	27.462936565406633	31.35574228646236	30.55557860879621	27.33900583467061	22.350948321526534	25.896682506787947	20.36257335192908	22.16282010233434	23.72410937001977	20.632182212987033	19.42302927274791	20.316189577425583	22.84977850537309	14.030049806462122	10.567650169393861	13.042586567772467	13.892299090720902	17.462928193610434	14.853304948755584	13.194319674073665	14.127936503874643	11.851968718655446	9.336872734176389	5.5	11.92189453616299	12.1411483498865	16.351357079235832	17.309722113710567	15.053005465257291	26.7317728992957	30.379776220243016	26.484362390702156	23.822000273422308	14.500211848112055	10.900327069464158	17.002683683624433	19.385192673403182
41.73204596834561	33.235367732383516	36.96158997083339	38.76340479769821	43.460197891961904	39.40560390068689	31.363857555370437	25.12429869064846	25.444188146494177	26.762314152545017	27.525422940678116	28.7579423737751	30.822009139262516	33.04417952209649	35.768514127090874	34.50961326039855	31.63810998415338	26.651775850166334	29.482359052191587	23.817353214599844	25.555908399958717	26.630511907769836	22.687154843633703	22.34657105837528	21.093049563757795	24.030264096641123	20.142422038479296	14.838345678504497	17.494594782574975	17.447406960026868	21.93150870932038	17.738224508800936	16.102003324298174	15.019510596897302	13.160535780889921	10.901612817176817	11.92189453616299	5.5	9.537905876030436	9.949561234500724	19.176590961062434	18.48954002326375	20.720779894218147	24.11838060088287	21.062099642708514	18.01321383394575	11.888229544287885	13.354670056791186	22.594478008129446	19.30092550215353
39.19556421381677	29.679818276022846	34.05937313917526	35.62861300669776	40.36572031815117	37.372601398785925	29.54612518394098	24.264169949075	23.053897533365053	23.784184186773803	24.72867446503176	26.313749283156795	27.99519149167365	30.57075732854891	32.47093060288299	31.02130529470491	28.334823023386967	23.4406834623741	25.914053423638325	20.312606592125945	21.986801899491287	22.89010033934024	18.808826038554233	18.700064583711573	17.067608128324125	20.01648145042764	18.701205847911112	12.514603365836482	14.84985447074645	14.323879783951558	18.96967226349242	14.296699840861427	12.831021941140305	11.158215292228622	9.710481673945711	8.859390518928633	12.1411483498865	9.537905876030436	5.5	11.908031199373974	15.341040649487407	20.89089186503955	23.561406795165116	26.425715670667703	24.45347686417998	21.1686318551521	15.832820144157282	15.881127092745936	23.64360270257427	22.977155134152024
45.51744593280426	35.95837171101782	40.45847314762059	42.03337103909386	46.77215367735354	43.4762581648823	35.51294927656771	29.51647134717917	29.29275408010553	30.18508407887847	31.101803215308443	32.58399060425512	34.378706056522105	36.86068207439787	38.852465342332565	37.33515001307997	34.719585508803334	29.84465045492059	32.19685610317829	26.652597427223526	28.28614992191943	29.043381086600174	24.806577931013138	24.970614047798396	22.56877520726267	25.539927344882024	24.373117917549003	18.629169702522553	21.137470130544955	20.724681343050683	25.36167512547421	20.687085070367488	19.238655085210404	17.360573218957917	16.11851016481928	14.65072803222835	16.351357079235832	9.949561234500724	11.908031199373974	5.5	21.467571421674954	22.23825185266775	17.16617792147238	20.08687758162735	18.33205158790875	14.914816516993426	13.766829738314424	17.25165365788964	26.897407570624456	21.368145874468166
31.394666158752994	20.036850489763758	25.597367223205314	26.63751830040574	31.37579684598288	30.82170040236065	24.0891804707754	22.112975202646172	16.90217397987686	15.74731776795059	17.111836925899844	19.514110186574385	20.00186865771902	23.311870770626985	23.224466479500183	21.464736018082554	19.17396444886308	14.764047014930863	16.297535707704817	11.062567709565421	12.466887178434535	13.078543278131452	9.024860034134655	9.165560382177324	8.992834850040103	11.065034917258421	16.632695575144716	12.567965482938488	11.494763296723654	9.727249385943384	11.950524856389961	8.332653924719828	9.68457267364158	9.683632137673236	11.640616351634524	14.45803096739162	17.309722113710567	19.176590961062434	15.341040649487407	21.467571421674954	5.5	26.555481859591684	33.05503174166979	35.42237575082303	34.23446240842135	30.874027616172715	24.92870347774279	22.696954215870615	26.099754599435236	31.060909637461034
39.79322804975724	36.81064016233205	36.984211407147185	39.65780841307602	43.79387913835452	35.77022599227763	27.99931986756664	20.02823741852587	25.390588503993204	28.608324896147575	28.495720595655136	28.135669551952304	31.31788958149675	31.805793362605137	37.73077048193207	37.583206789229656	34.1021443294614	29.487781046105525	33.57128722234825	28.52983433098669	30.24770429087834	32.09435047992788	29.647114140544026	28.04447555486756	29.744851412133126	32.117403272694645	19.000058876031588	19.49755789114177	21.293405168696786	22.66789193361858	24.94374474262918	23.873735148688088	22.37100298541006	23.669319144781777	21.404535811289115	18.78669792705994	15.053005465257291	18.48954002326375	20.89089186503955	22.23825185266775	26.555481859591684	5.5	28.76221203529589	33.08185602884197	26.96638549926926	25.65838982662521	15.061829712759955	10.642932194748232	12.310100856106105	13.077276514245376
56.946845523721294	47.58202475518146	52.05480392529687	53.68864636370144	58.4229501504766	54.562778852260394	46.47406442864117	39.74907501599205	40.661622171390235	41.79491879494687	42.653452433823915	43.974218993261566	45.943994596335564	48.26092961956995	50.51860187013182	48.977423336460106	46.38571662772744	41.501700859553864	43.82706554676455	38.311760128182975	39.92893169697203	40.60554801434677	36.301418625278785	36.606168911969064	33.80202921839903	36.71578334102544	35.225123973520496	30.02154600816049	32.6298041194005	32.34731419863414	36.95899081125312	32.35163334358949	30.881054677640375	29.000254608156915	27.767227307820338	26.033769802355778	26.7317728992957	20.720779894218147	23.561406795165116	17.16617792147238	33.05503174166979	28.76221203529589	5.5	9.920640921589793	9.202660351206093	8.616547705258593	19.43076167516062	25.116323260021858	35.01522642928714	23.830173050969883
60.10074594161621	49.92422146432047	54.960199464171204	56.40060883704818	61.15035468101849	58.00367069921551	49.98081031306616	43.541578282497156	43.87766958365004	44.68747381313915	45.65436842404682	47.17073201857343	48.91792537890653	51.447449189397354	53.10181685598464	51.379366560194214	48.9987406437015	44.23638120385055	46.21037793930705	40.85621866882536	42.381359303298375	42.84513030578292	38.471352153987944	39.05759508434239	35.70826557092039	38.51627917498306	38.758396024003844	33.20967601012078	35.72163241917803	35.23834483690146	39.88987025882119	35.072486055404966	33.7254572485476	31.547818329984043	30.61048492453617	29.220665761580925	30.379776220243016	24.11838060088287	26.425715670667703	20.08687758162735	35.42237575082303	33.08185602884197	9.920640921589793	5.5	13.048723459765512	12.945187383878801	23.647431619491503	29.24544850882525	39.2195366332533	28.247048504492128
57.061809185634445	48.63137908745674	52.48836594859185	54.32548260471996	59.019618529356144	54.31598034538354	46.1818928072825	39.06573707926418	40.80949202418773	42.31920040562162	43.04503095258826	44.116904606988804	46.339763650279686	48.38419268559755	51.30881825755492	49.95927195579946	47.17357371024517	42.20284360830697	44.86584873957895	39.24522883324737	40.936791167047765	41.81070676148827	37.61918668041429	37.65333048571648	35.384991613919	38.348751782046676	35.00144034445658	30.35401629337928	33.03482101457778	32.993032565899185	37.49219112274285	33.18463462159113	31.60540987125217	30.077565731623825	28.559337795335974	26.462012295882175	26.484362390702156	21.062099642708514	24.45347686417998	18.33205158790875	34.23446240842135	26.96638549926926	9.202660351206093	13.048723459765512	5.5	9.034682060427428	18.22169866487107	23.964828968020687	33.51800288951621	21.219672364442342
54.21661740028646	45.33312880114887	49.465386832492314	51.204229040904394	55.920347376803626	51.69405722874462	43.58409396210732	36.74256183370541	37.93024707209139	39.24059876062978	40.03462731631744	41.24473118494517	43.330851181670084	45.527604384661444	48.116393193435016	46.68751073776647	43.97862092445786	39.04073845034474	41.56815097179474	35.98114577989027	37.64631870150229	38.45208469771439	34.220997150694785	34.34394642295041	31.917183283809845	34.87353029796164	32.343802009780404	27.35154790028657	30.00078992776502	29.840828005847946	34.40221311171361	29.950734419405514	28.414432187717154	26.74302695812793	25.33063533608705	23.396296276331025	23.822000273422308	18.01321383394575	21.1686318551521	14.914816516993426	30.874027616172715	25.65838982662521	8.616547705258593	12.945187383878801	9.034682060427428	5.5	16.316246829233357	22.013424317530312	31.899298816748512	20.957197712064914
44.924240062612654	38.26290095576592	40.83410467506615	42.99028221763301	47.556464064331465	41.83829563912676	33.707816363034695	26.388803931153582	28.90467700054549	31.014354776244776	31.482306977095206	32.1459757667845	34.71739833509963	36.33123412667043	40.314918643804255	39.401832429573794	36.26495480248964	31.254405569121225	34.588193253536446	28.94441683589644	30.739108562452937	32.08000884068944	28.44632597453237	27.7283052573428	27.216360876665334	30.09203277682421	22.71948776510994	19.21962794728075	21.870598826122585	22.375260443455936	26.370074628773743	23.018969825724444	21.29841150749631	20.929586760186112	18.789958248032363	16.008353584230253	14.500211848112055	11.888229544287885	15.832820144157282	13.766829738314424	24.92870347774279	15.061829712759955	19.43076167516062	23.647431619491503	18.22169866487107	16.316246829233357	5.5	11.255325510301029	21.086680057532966	13.166060994498029
39.770752667804956	34.55461515607396	36.104246243914474	38.48248580208905	42.90667264701698	36.399496046649446	28.30841089513335	20.768268444578872	24.148374853391612	26.758091224518072	26.985189682451576	27.26097681773599	30.100429593118644	31.3155222796057	36.10226424676141	35.529783568960966	32.197478832250724	27.295520096523767	31.050122278740282	25.62022398068677	27.410291189475746	29.047826180485515	26.032477177442377	24.779596418402658	25.62211933489832	28.220036584086465	17.71112094567024	15.9203165377402	18.232948482993354	19.247105056820672	22.462986086355752	20.249310531175396	18.59461363299841	19.320774737317308	17.00730303542354	14.192930189318146	10.900327069464158	13.354670056791186	15.881127092745936	17.25165365788964	22.696954215870615	10.642932194748232	25.116323260021858	29.24544850882525	23.964828968020687	22.013424317530312	11.255325510301029	5.5	15.52931027397535	14.049175919727384
33.95353974902652	33.323117353954046	31.93881984623326	34.84167211052292	38.61756141622132	29.54364638792863	22.178723447855212	14.34073163105653	21.288439306752274	24.999846467032956	24.480240871939056	23.424931802855962	26.81540552043155	26.54372150944278	33.45306195999889	33.81386629268623	30.27548931830862	26.261188255479535	30.56631884101729	26.37175476385471	27.868406177797315	29.92171738165013	28.53660128332722	26.467723978119977	29.569342399288658	31.373997443431428	15.864154761206633	19.456943570062187	20.146079615634527	21.875656791609085	22.479660764466693	23.267913605093327	22.202391397601858	24.420264954614876	22.50454262338209	20.655959716570926	17.002683683624433	22.594478008129446	23.64360270257427	26.897407570624456	26.099754599435236	12.310100856106105	35.01522642928714	39.2195366332533	33.51800288951621	31.899298816748512	21.086680057532966	15.52931027397535	5.5	19.75802626643752
47.22317196325689	43.05341122366269	44.09594811575229	46.63134464594055	50.92083378405739	43.31720476720742	35.47170365459992	27.53516351193527	32.25915329441685	35.12869985842792	35.23360256586591	35.20858649180591	38.23803148826136	39.060087640182594	44.432905528973656	43.98726763730474	40.60654716945902	35.76266937034476	39.582257025983445	34.16939979604779	35.95914971044921	37.589453519737006	34.46788984497757	33.305281037212666	33.789213243674475	36.50975226098686	25.761885560258133	24.44372829186774	26.781444636519648	27.77206178441852	30.967927128122803	28.72453285615204	27.040532415328038	27.41622509592725	25.126953778112433	22.236134123039346	19.385192673403182	19.30092550215353	22.977155134152024	21.368145874468166	31.060909637461034	13.077276514245376	23.830173050969883	28.247048504492128	21.219672364442342	20.957197712064914	13.166060994498029	14.049175919727384	19.75802626643752	5.5
51.86525794416582	46.829206940756144	48.47128354510142	50.89159822405297	55.285837699032655	48.10691730587054	40.180367239912925	32.30139076422371	36.53879648533719	39.15942763638718	39.401163280288515	39.599895236458984	42.50345274824934	43.56650293724188	48.508416185986974	47.86245560373311	44.574812369408704	39.633679922838894	43.243450156380284	37.68262154262912	39.48486579109737	40.958683781650926	37.49356435174044	36.61412879554127	36.37513141140332	39.23492875302899	30.065377663990624	27.864649187074434	30.389289793159488	31.14318490232292	34.764078585593936	31.92601650630626	30.20553685366006	30.06236340383523	27.877677413441926	25.036791744630733	22.847266028726768	20.987301066666603	24.98307680779281	21.715356389509875	33.99424591527418	17.982907795600035	20.801657834454428	25.086518909841065	17.634208892608925	18.349404498149077	14.667687549322313	17.91636317289015	24.716204770694624	10.46995907780039
53.85861925536656	47.6864845519145	50.06270754623699	52.310867512932056	56.8285338027269	50.403741207072656	42.3536096111293	34.645899152316225	38.09735497504686	40.3816113609864	40.78676417780764	41.27713041853581	43.9858973066878	45.380572883471665	49.70483941598583	48.82468631183059	45.67137637071359	40.66624279278164	44.00666173734635	38.3553084876327	40.14662509947704	41.442549102410574	37.68955204291423	37.09686947010109	36.187105151274324	39.12695604669566	31.74588183001856	28.643482742601297	31.28842386577895	31.789579982760422	35.778520256114156	32.39129121339924	30.67670461702431	30.064864748059367	28.037819124509923	25.346511579765426	23.851150669087378	20.596722429639264	24.620546681657537	20.222556300592966	34.164841428238354	20.85137207705891	17.122267983216844	21.306704127523442	13.7883022533471	14.96083556366593	14.924271844562043	19.587928194322213	27.661344652611838	13.821696662124225
59.27600945367996	51.73369752798489	55.03211581434561	57.045364932359774	61.682265145032176	56.17785124990885	48.05562369919883	40.59717625737079	43.17276686697893	45.01512445724623	45.61492830324571	46.44402913057701	48.887560979123386	50.658857174381744	54.179079251945396	52.999173136209436	50.064997337468846	45.05456572481803	47.98074236719684	42.315420140559716	44.05344684902892	45.076482669098354	40.99958949097101	40.82791932146863	38.96940392636495	41.946928548953075	37.075561016494675	33.02964787064668	35.729709126109555	35.894470823422196	40.24238524793236	36.23668072871825	34.59127462014729	33.35911908470901	31.648164807491305	29.30094499501969	28.71662648032438	23.99855213834021	27.701448300626005	21.943053290447015	37.54241896452435	27.399958543676476	13.3607220878987	16.421069196859065	9.843887743170715	13.175816495762062	19.865331598944948	25.32997423625151	34.17443972235193	20.6507959754121
72.7441866250951	66.71022393486959	69.1423569239521	71.42258779477132	75.92346753815502	69.0088372457032	61.085502929957705	53.20592910226599	57.17486313368417	59.496406868118086	59.89750528622406	60.321393921687054	63.085503081667376	64.36972551061557	68.8139624270433	67.8839949005523	64.76850921707839	59.756984337466236	63.00054756162187	57.33028677104868	59.107602952094354	60.29352473222934	56.3589368023088	55.977333940879824	54.50751654670047	57.48491684009997	50.772995233159406	47.706545741920664	50.370724799875724	50.78988460421479	54.87362039602559	51.30041559326305	49.6048616666681	48.68687188453783	46.815310730940276	44.256075283605945	42.96512863283161	39.18339990329464	43.06787775025036	37.58046489480599	52.85707150820691	38.79375715978329	28.155874340251234	29.35619303959377	25.281552872206422	28.782463447039646	34.003579808046055	38.563731328389636	45.37452945725968	31.217833587647647
67.29814995751647	58.8159128092365	62.77198166699668	64.60445109154948	69.30217231878089	64.42743113495398	56.29113229774468	48.985756539230195	51.06823633883298	52.60258172362079	53.328492614518225	54.37111909606638	56.62274358124798	58.63012353991047	61.5657695534654	60.1674856370547	57.42875372059994	52.46960940216536	55.0508526898246	49.458194787233296	51.12833049281733	51.92431404853423	47.67063312415788	47.82677871190632	45.26660226131895	48.196709234304166	45.174603866894984	40.63852335718819	43.319570703351154	43.2601453171548	47.77376990477751	43.416070920578754	41.85782660710915	40.22485434103823	38.79166093676179	36.743509589851996	36.68917376182705	31.34232433398417	34.646348920030746	28.38098605432676	44.3482948811597	35.98908517855452	17.016034648878136	16.705405426864786	15.784793876473854	18.982833148904934	28.116015700334	33.73496009811398	42.756725885014916	29.16549391374629
79.59225987412324	69.87471367068358	74.68501670291167	76.24620655536756	80.99079099330041	77.08655145918571	68.96553496188491	61.92910495546323	63.30434405443976	64.41535214139114	65.29828903641403	66.61818763268678	68.58599324593891	70.90435923113188	72.99960834660898	71.32232343535998	68.88244841770381	64.06043562631447	66.1535983335154	60.75578226231293	62.308136168175665	62.801056516585696	58.42827708752957	58.98108127476218	55.64529276825423	58.42393428161929	57.738227848100166	52.67315266558208	55.28001010590473	54.9567011265041	59.58567671472008	54.890375056973774	53.47155008426293	51.430305304863836	50.35059346001222	48.685868415244585	49.20929099799995	43.3602457536448	46.14053146130409	39.7335098906237	55.35899478454056	49.35197113453903	28.152129176391266	25.45694870804153	28.36366513651347	30.90724540794882	41.07087373040113	46.79247660591391	56.081879730306504	42.61357765122773
87.06166439485551	77.64833044650165	82.28135352404489	83.91575095861992	88.65337031923634	84.37886628721802	76.24359410488431	69.02343477932718	70.77936927013153	72.02732616599464	72.86644018377451	74.09337634009601	76.16046432922106	78.37385033463345	80.71127437057471	79.0825942470977	76.58535787758863	71.72707805442593	73.91614537324375	68.4774259843784	70.05290615176122	70.59160006300866	66.22749449949993	66.7247370609248	63.47956348688674	66.27392462863077	65.0636524258086	60.19829443784711	62.833790361940785	62.581681112086194	67.19006333255577	62.56600014135262	61.11302452170007	59.14952204846168	57.99662745199157	56.22856109226261	56.54063207730892	50.862133613853196	53.78773422262189	47.382432099262154	63.11861091733258	55.947104373585525	35.73436928015242	33.27250910803839	35.56454055767871	38.352976335225826	48.13793911645826	53.78529345615299	62.7411759668572	48.8827711048604
88.58403251970427	80.96264856262492	84.45399041768613	86.4629512223798	91.10673259307218	85.23482604494936	77.17209374422829	69.47311886634002	72.57162283307613	74.43167218917434	75.04018231923413	75.82714710453443	78.3114112560097	80.01455360375886	83.55320055610659	82.27743629955556	79.42746548745481	74.42953698278129	77.19779620388641	71.56529550810279	73.26747189252114	74.14160941422058	69.9223415743077	69.98928414682999	67.55877395606484	70.4914763772178	66.38799253569309	62.439765138553305	65.13939605803309	65.23758957001678	69.64460155204425	65.49388550648334	63.888240068635106	62.413028468232305	60.87304225000314	58.65718573720985	58.11941435479386	53.293408980558695	56.789232299388566	50.615999886674096	66.56344105196622	55.3757090486923	39.29791537618418	38.2501778256007	37.836951621721134	41.201350075159844	49.18461289531109	54.36967452756925	62.109439776162894	47.8514222821952
104.85957181679812	95.17158752750609	100.01940714923286	101.59151975051911	106.3362873181235	102.19612973059884	94.06057837717465	86.81506210207753	88.57334854676165	89.75331300656121	90.62091060968437	91.88786360972607	93.91173108257418	96.1706691224806	98.33704262168408	96.63151313537344	94.2230466026916	89.4059515978699	91.46263629298865	86.09147665755486	87.6317708095001	88.08144153895721	83.69959851079835	84.30645017174233	80.85087701091439	83.5773163953211	82.88089489380367	77.97153499794429	80.59417850496925	80.29678284656	84.92087780437724	80.23581755862654	78.81464724608982	76.76883453914755	75.69407676753839	73.99271580522043	74.35691017112848	68.6416338518332	71.48372842264997	65.07602890454476	80.67495766528594	73.56755045919881	53.46773648658534	50.75285690118426	53.38230426443759	56.14316645411769	65.93728054566999	71.56285291036095	80.37523031164999	66.36176199212261
102.04223290138374	91.87349033689148	97.02878067120541	98.48190159470322	103.23204546286206	99.59501801444173	91.47560360218185	84.4158410295125	85.76098837092532	86.75332410433796	87.68297319000366	89.07240181706706	90.96061013339164	93.3590924456105	95.15782931608689	93.3593011602514	91.06732598629304	86.32142747726631	88.19718862978138	82.91925962792025	84.4119229533921	84.76254344741831	80.37329026865486	81.09743493222548	77.44081644613685	80.10497327851563	80.24554565894174	75.10878071617891	77.69039217809879	77.29482959031544	81.94000271982983	77.15665180715581	75.7916253466201	73.6266034595939	72.67188075062917	71.11454845526131	71.71761755424177	65.8223534838537	68.4713393320757	62.08201704201159	77.44507522205514	71.56281552023349	50.60157752400947	47.585050316480086	50.85494389439137	53.40666768043891	63.53769564591948	69.23603321484512	78.3438805578068	64.54902906730317
97.16261140450423	86.75855437894933	92.05963377867799	93.45140904002375	98.20126479526587	94.84265184385546	86.74186746509613	79.80902971152092	80.89987006754895	81.78806473261488	82.74996777607953	84.20579311636862	86.01737768775502	88.49029759193151	90.0957738883299	88.25511579821558	86.01941042735395	81.31277584925775	83.09944520476992	77.86992822966734	79.33834224303953	79.64299132215598	75.25373202212057	76.03188609789767	72.28683480990384	74.9231672982387	75.49655965240497	70.23321831381884	72.78788461607371	72.33899294995939	76.98994914918761	72.16018032940077	70.82642112380243	68.60198375696953	67.71137487606174	66.23665778857901	66.98149557963717	60.98914535219043	63.5226577426402	57.15565250493573	72.37294835258349	67.25639732564592	45.78488759530189	42.601040300094574	46.25959336813446	48.6608054712003	58.97848206834292	64.70947063702879	74.00016431819645	60.41055051135789
99.36638673445839	87.95142079133478	93.9260010695944	95.03223932341209	99.75453314604322	97.5211384532903	89.53268633354298	83.05218100464002	83.27956614143555	83.74076960165235	84.83130231355658	86.53988399779513	88.03279563841305	90.78682531674903	91.54363655407373	89.49660147156737	87.5636789031102	83.07667245934508	84.41122067807156	79.46963386851671	80.80503505687085	80.86283840719896	76.5111541340453	77.56735647454774	73.37324968832819	75.81100225699001	78.32266600820658	72.6539361996343	75.07753959562369	74.41413386964693	79.04651577610068	74.05966815568942	72.87681121182258	70.409641196773	69.81559347874393	68.69276713431113	69.93636494409056	63.68036648405472	65.72768544760154	59.544907027439336	73.90958420071249	71.42352305175694	48.82069838253169	45.06727425063551	49.99310906548886	51.87249115102913	62.58174236466771	68.33073321655414	78.01086938455322	65.04345040869649
107.56937552943997	98.25134681970475	102.86541805643193	104.52442018002064	109.25997976876984	104.74539259896197	96.60981587995491	89.23670011534195	91.30289456684206	92.62056790522787	93.44072990257675	94.61425460668856	96.73643489076812	98.8876439454938	101.3254005347865	99.69051866672783	97.19916466348991	92.33627102914832	94.52311486343646	89.09137090868904	90.66420094958234	91.18554758776195	86.81548346266639	87.33607870400563	84.0316448986205	86.79877226224464	85.48882315035303	80.7590470210185	83.40645655766924	83.18192605765687	87.78195300613879	83.17766578405947	81.71817176858497	79.76338967365115	78.6035280314095	76.80073589394173	76.98775582828819	71.42076377609268	74.39581200750476	67.99232697929656	83.72584233833234	75.72292719517746	56.33712824419046	53.8453101431256	56.01046380688825	58.90782708877771	68.4161569187306	73.96843657609999	82.53113124618567	68.39683306388504
67.7096617004417	56.48610943920485	62.264965886757146	63.42342121740726	68.15791369957037	65.99643881222303	58.09161038179416	51.99974306377928	51.68083226240306	52.07390879601175	53.17032368671387	54.92105299638632	56.36661980720631	59.15256869269857	59.97258216135822	58.009172419763495	55.95716880345401	51.4207254261929	52.884034686939	47.839053382007144	49.2132094825747	49.372752550370805	44.994971657325976	45.95020013519307	41.94181189972753	44.51641110140044	46.97132392456838	41.10992707182215	43.47393839336224	42.76216847664811	47.38714887140239	42.39300416352458	41.223314903892174	38.743295139809526	38.17760645454509	37.191066020565984	38.78402469264532	32.396789669648015	34.13336576444176	28.09871392095528	42.28653382312356	41.960352761407925	18.76227858921405	14.381803649409118	21.40340921994448	21.824660802197293	32.49887147970951	38.03900034366414	48.04363320021989	36.998588907464125
58.402537417862256	47.427536136823186	52.998226084096665	54.22392320973003	58.96709687306548	56.693923874723204	48.814538533064116	42.8858460483298	42.36724977994662	42.78543788427291	43.866605605599375	45.6059926001702	47.07253402249831	49.83830460974022	50.81363315961715	48.92830795516273	46.766767091822715	42.1679730419344	43.77821619802152	38.62851241100391	40.04829175419067	40.31135346931088	35.92234126389677	36.76019198943874	32.97127817329347	35.65982489424556	37.74014089038167	31.811829107313137	34.16052874723053	33.451779177886124	38.08181891535496	33.10352825362964	31.913640644199504	29.46689241287306	28.86309415559227	27.913284319117434	29.68343498667605	23.263920270939277	24.824115123781223	18.885754779648224	33.09493707073101	33.822831849001986	12.45129158437664	9.721577536513346	16.13013424417423	14.648272181626332	24.26298124904854	29.4827020171469	39.502569900390235	29.962023670946017
99.62955392434013	87.02406574447616	93.8091853905093	94.51098539258557	99.12729908850034	98.4610685859255	90.7499059922115	85.0072010251985	84.04894172927926	83.9207413017332	85.16450910653226	87.18488756100103	88.21700904878763	91.30645423848043	90.89810109084752	88.607323169451	87.11768350797342	83.0141789772305	83.71111283908866	79.26211322848913	80.3885343931395	80.11227047854193	75.9113190272242	77.31689421261179	72.62353041437582	74.73130591478653	79.8043053586039	73.72254019698508	75.90672263694309	74.96983928220082	79.46640330862591	74.38722208781886	73.43913084986738	70.7131526808491	70.53580516262006	69.92020707890983	71.80133087581231	65.38425877518438	66.71024968586916	60.99952176125395	73.75168323879898	74.89949217773363	51.64800305635688	47.405069258337114	53.65706514380297	54.761340513867495	65.54561097838663	71.14304289391465	81.12429780454197	69.32223869553675
105.46765019963235	92.44846921042505	99.52666151908569	100.06239757019662	104.61221704298403	104.55200513593226	96.96811468735808	91.485882506425	90.14610292134736	89.80534966833733	91.09887709217486	93.22157451370772	94.07912646505206	97.27744110263613	96.41755299463682	94.03811616447477	92.74030976181606	88.81242393751658	89.2515930549856	85.02904919809438	86.06589656318684	85.65679690954377	81.54856566646602	83.08100303204965	78.22768534461676	80.18131884945541	86.16166008454782	79.98288918427141	82.07277189334157	81.04774811275918	85.46627920083951	80.38827058503762	79.53015936880553	76.73362124876489	76.70257773261552	76.25791115791272	78.32114011193161	71.90008950108836	72.9938992907028	67.47764915611799	79.57821130399941	81.82473743912377	58.565577890383366	54.2548898987506	60.731581752442665	61.66635126290269	72.39528064527408	77.92519312610388	87.93869302033711	76.43610295856959
101.61092246535073	87.90542415650933	95.47343865816329	95.68668743570916	100.07930393941032	101.24253023492881	94.01156309822547	89.23042612368991	86.97525991053085	86.17876743832616	87.56365379498315	89.88627801871993	90.36437257152132	93.76309207398741	92.01252682221661	89.49194377528036	88.56256561810193	85.01900306403627	84.95296366133667	81.21422548925638	82.06238995802364	81.40432020335402	77.52107907460669	79.2835962165122	74.18068100738645	75.82038287448923	83.64947082579049	77.30865587802965	79.14998398535913	77.9381884665079	82.1314511166855	77.1183429239175	76.46993664051223	73.55660001845253	73.85413636493043	73.82401509308822	76.32824354174586	69.9933394300175	70.47835957649735	65.5495296151145	75.95181761818463	81.03063173015558	58.142867023508536	53.723000494042466	60.8419170592377	61.12808128135449	71.47092483844145	76.70198040370431	86.70066653200362	76.4452833414222
97.67591731566478	84.21141705006973	91.60204496178972	91.9371993212541	96.39673295648606	97.12239301912015	89.77305530618652	84.78859339788396	82.79264915321507	82.1436438977739	83.49983500021762	85.76018319122927	86.36567583850498	89.70099318008106	88.26973730412234	85.80145202707817	84.72802790529555	81.03965479439043	81.15878481632194	77.23600785336471	78.15318446349268	77.5866417792774	73.61234820974148	75.29577177737019	70.27233846519631	72.03399085500102	79.26821178773767	72.96156042411052	74.87857035269492	73.7211502248868	77.9930820871328	72.94999045451227	72.23488485068431	69.35162139445862	69.55031633274535	69.40356955532245	71.79922969406462	65.43060085948079	66.0727898681836	60.98138039899314	71.89845120459853	76.25249018746051	53.258759373227264	48.84376447204708	55.88818131240463	56.2696019036605	66.70166938920508	72.00052687894903	82.01702218900198	71.53025193623118
95.21615159032505	82.35906470370482	89.31576977104663	89.91868324917634	94.49961909196635	94.2315893440889	86.62418626207076	81.12833796719269	79.82159771357178	79.53461281988876	80.81404018880613	82.91095172121739	83.81670822701223	86.98427427939842	86.2864210596071	83.9464240713758	82.56391291169598	78.56899896424362	79.10814481042742	74.79483415294163	75.86498321675828	75.509837096303	71.36106514229706	72.8469040592432	68.05160325560524	70.07337796459343	75.80399890297171	69.63155149894679	71.73405461473347	70.72482918721386	75.1623898015207	70.08241394286784	69.20415330176024	66.42182668798998	66.36249664710235	65.90049525213394	67.96760545020044	61.54720074749416	62.63947229955222	57.12223844922231	69.3215310984364	71.59853923968252	48.36059427071831	44.01668553997504	50.65303386561164	51.44835377751423	62.13474292796159	67.63146534703651	77.65293209390695	66.37268685062661
85.01093453132005	72.71859325185524	79.27034022871244	80.08702372408109	84.7449564598918	83.72682139883683	75.97981318231207	70.2099504089922	69.32112656503352	69.29466704396572	70.50981112859144	72.47933970756742	73.59785241949588	76.62715568892594	76.50597769148831	74.29209460275911	72.65618080401079	68.44111050812765	69.32021156178712	64.71658898627425	65.9026240048754	65.72843320837639	61.467385138880736	62.77756097351606	58.216519169376376	60.44637085564416	65.01107033162643	58.949002709184626	61.15987038398158	60.25820311054999	64.78550383932736	59.71246977860158	58.72356007408851	56.034178166047	55.79325145270744	55.13210657462898	57.006192709384344	50.58794401423564	51.934813344874016	46.2011568053373	59.179164503811585	60.31699358950777	37.06000678325055	32.747387634861596	39.304419877953464	40.15875597635906	50.89076758533252	56.439535473317385	66.44452723597706	55.02386306022582
90.84727853669979	78.35386615573863	85.05243563768565	85.7962728142085	90.42960875470642	89.65076403175317	81.93781187409199	76.22313304852021	75.23925597895426	75.13485075358788	76.3707391676482	78.3791900668567	79.43359193593976	82.5067958219552	82.19484609106448	79.93370615267082	78.38742145006155	74.2444775008324	75.00649042485674	70.50080383945793	71.64797611209013	71.40926530190866	67.18464332737526	68.55726142372603	63.90925194721682	66.06453380550812	71.0002365360691	64.91099310967093	67.09476389960415	66.16245207379121	70.66564039878412	65.58749743154607	64.63099312767073	61.91212049821446	61.72409204408426	61.11293367790178	63.023855384842705	56.60406570518568	57.899137317440186	52.209821931781896	64.98058059918208	66.3218689302371	43.06041628734717	38.76385117380704	45.23302681640787	46.164144226171565	56.91024071961739	62.46746371814199	72.46960820551638	60.94509313415151
82.57243490508046	70.6084098606088	76.92997805112763	77.8596498128057	82.54858371737912	81.1160752528791	73.29258698456076	67.34201920946802	66.73603222828635	66.8658478950353	68.04073102535371	69.93038133240704	71.1717667158543	74.11513584473494	74.31332307889485	72.17056037022338	70.4049731555795	66.07866856948135	67.14211971457914	62.39250217127527	63.639892686529066	63.56478755318149	59.2571699559807	60.46446171347095	56.05127088275518	58.38449432306269	62.24159586533565	56.268490695368556	58.54597312306743	57.71547553360764	62.28633509784275	57.23145547912699	56.17635213158709	53.554057259358736	53.19737416177735	52.40137441272984	54.125855137681135	47.72361844618342	49.2587288221604	43.380786348570325	56.8359979175519	57.12002459534769	33.861298174287185	29.611851708562607	35.97257009175433	36.97266024426402	47.75200912027127	53.352969130336135	63.33065127250523	51.681974671278155
79.86784940466667	68.30460767655265	74.34704239170848	75.40558570366049	80.12242295363619	78.21504348833825	70.31330923499445	64.16041693248837	63.88674255204119	64.19928561249486	65.32462767806868	67.11742140935979	68.49968186618104	71.33805163868328	71.90599796627073	69.85005996447822	67.93785771946645	63.49155282129231	64.7677480262798	59.859684901395276	61.17572232505723	61.216911140354185	56.86782951989922	57.950055017762004	53.7264400709143	56.172903885013774	59.18397804766368	53.329789636547204	55.68077762096469	54.93708943902755	59.54764942845901	54.527852171738225	53.39704923765749	50.86339225295801	50.369006016267875	49.41309149362625	50.952947837475875	44.5872056135288	46.34684276904174	40.314384787850464	54.29742465230387	53.564282275647685	30.351742600680286	26.209723847887606	32.283574175311045	33.468226302517046	44.27970852526582	49.9337906456605	59.86598659882895	47.960340640428576
72.55666972118	61.28189815095349	67.11039055342614	68.25514726429066	72.98698840761138	70.81879685636889	62.89544818580978	56.71587776632845	56.5164535615865	56.921760636333886	58.01784410691518	59.760972428320095	61.214622962842526	63.995621137508145	64.79471420448023	62.81069031430083	60.78774510202114	56.26445323686741	57.69413794485125	52.6753695941396	54.039217958520844	54.17255830434217	49.800108835592916	50.78262935087325	46.72308570892702	49.263637949429125	51.75107620410036	45.931631943615244	48.30966794582655	47.60801822011638	52.234385255564035	47.240960091670495	46.0694134435912	43.590604598948346	43.02035466962043	42.001124333672465	43.508571795216575	37.14592336864227	38.965245565737476	32.88708269158991	47.12021659955854	46.27840881080368	23.02038174280649	18.800647195095987	25.205871331847806	26.13289961243736	36.921763731776856	42.5446490774062	52.50545808573744	40.92530204163635
72.24069479751779	60.465940447974226	66.63608869821465	67.62622125352158	72.33164526999283	70.76396901376243	62.95052466651764	57.08482629467654	56.3833368862764	56.54130731197764	57.70406743991769	59.579577173066085	60.84662428223511	63.768557404614995	64.10538453144085	62.01705235568994	60.162657283857484	55.78040955180404	56.95210300254402	52.115588468930994	53.39692192752395	53.39048026901354	49.05502256197125	50.19524678963846	45.88930455806373	48.306791613190825	51.92515234473359	45.92292576330431	48.193371662213615	47.366691628208585	51.944122426723986	46.89506926928829	45.82723290351129	43.21947834486597	42.84473772773265	42.06795398947783	43.8768741552866	37.46086226665724	38.911181741540226	33.086235464543265	46.55429121853635	47.36888420581062	24.20697730847612	19.812076058253794	26.822424996346953	27.257121256501087	37.8783345617465	43.36665957373277	53.387036484615834	42.44597595367307
53.15849866568071	42.83920571856384	47.92899447459717	49.32741304831085	54.077614638776254	51.24645357856349	43.30226006823269	37.23213899059985	37.00161739423998	37.664600242820356	38.667649769867424	40.273719845831145	41.91560185228496	44.53528067353061	46.0162068152014	44.29140151623599	41.916710691082336	37.17478165780716	39.12238068350168	33.771702442725584	35.29228622289062	35.76670216589967	31.398520790754283	31.968895658056248	28.685353514969705	31.52993919217362	32.163398213347364	26.3691502097499	28.808117263308503	28.237094375628438	32.88939367561652	28.02143925484818	26.7132360858259	24.472038605061133	23.6113342037024	22.417042259536473	24.019979509145127	17.609048467985993	19.46539919936893	13.29297851940721	28.333216552070674	28.361349194513288	11.221133865875956	12.5892322249456	14.265003940963407	11.215392649758767	18.850355545507725	23.87647392018421	33.8753324176036	25.16495134490291
54.61632491141071	43.53302913917574	49.158413395605876	50.35050396926947	55.09142190663154	53.02490448724231	45.211848842361235	39.530014634326285	38.65717537380168	38.96733032171248	40.07392428530207	41.87219440945206	43.261952000734404	46.08482464981955	46.92966729414678	45.034809825638995	42.889886375834216	38.317670226488346	39.88617946947544	34.757073238235805	36.16426030102046	36.416691245836894	32.02777974546765	32.88174427540829	29.080516613725756	31.781897390593695	34.23702365138982	28.18171129915037	30.458964935121568	29.682189636860194	34.29424471514078	29.28760419002785	28.14206820463709	25.635372218588305	25.124467597398034	24.350390501166757	26.405794300651316	20.006763765702566	21.16861742491474	15.558800742152561	29.21618390733018	31.437450444752624	13.30429819799111	12.691309807045478	16.825064817601284	14.220724213154737	22.00335440418355	26.79943460059751	36.722423446172286	28.475590428585317
42.94490711925429	30.35976267725835	36.99443722049217	37.68524005535367	42.338347140309644	42.41548510482947	35.40247678632325	31.89769789131319	28.258873915596578	27.363366833294247	28.730946543054888	31.071308487094342	31.592525739774974	34.931968001769754	34.09926580770056	31.921162747276107	30.27402255375143	26.287460805310168	26.914497750310478	22.494344560155284	23.548232141860574	23.326065471331002	19.069862827484094	20.547200184894287	15.811380242110245	18.191802599640397	26.049241686767626	19.80183253839796	20.928901594108936	19.449232998956973	23.348133171555343	18.444792914719446	18.12293277382123	15.143855209466752	16.234605012877747	17.68255538537649	21.420402347430407	17.823625388671328	14.941797666741559	16.347497347098315	17.120974453281423	30.307638811762498	25.431833448008163	26.435762329105255	27.835027500785415	24.317204842159224	23.911790745357006	25.23877138437901	32.83827812657976	31.530680357725608
42.065179936732946	30.501122847283863	36.37444440695977	37.406036322122944	42.13315823802089	41.02911461253834	33.64307029573823	29.400991951045516	26.65488127441411	26.349456201971282	27.58735058380061	29.683001993810517	30.651576039404578	33.745025148965006	33.93973282317279	32.00534268816794	29.937461080125804	25.52181824515781	26.86272193816146	21.854169087430577	23.18377506070578	23.384730763825672	18.995845555376608	19.94229029873425	16.103098448485255	18.910021135797585	23.60128306224518	17.217414826787707	18.80223213268113	17.577012406698472	21.923985595814422	16.84718263855362	16.1004772764678	13.211044324882227	13.634330911901781	14.528073133356086	18.128396834193474	14.256510719585412	11.523924405510297	13.178935606295143	16.291674893652583	26.801347342344677	23.42988358365344	25.112160268496737	25.41575963087198	21.88368964704296	20.39842758403644	21.70896390938567	29.619491435204406	27.991277229310366
46.424971667812855	34.5913535610457	40.69612760618757	41.651380101126634	46.36255518352503	45.38994830481759	37.952064707887494	33.41285798782256	31.003291597557066	30.711421971447542	31.95727678629236	34.04920337245408	35.01099744505659	38.116457093794956	38.144685206739446	36.121474311485585	34.18655525016811	29.85325123591989	31.01533456382758	26.152947463366413	27.421202239777784	27.483068966896735	23.116440928379102	24.225329776533727	20.04240922693733	22.668022105547692	27.68330986201984	21.29581254494056	23.0668797047379	21.911719895820493	26.293486404340552	21.21491953516018	20.416053397278617	17.566125029633298	17.783150767997167	18.1497660244055	21.37514555449806	16.16056011659557	14.836715313920594	13.14267745876582	20.59891581939931	29.15007319636084	20.69002422317151	21.622455886806552	23.272646116493775	19.799944808698083	21.364387348459637	24.01298177855629	32.8076949417507	29.00027904523252
56.37124983350298	44.356502345204774	50.64427821021836	51.549755434049096	56.24366387767017	55.22208176211739	47.6364618604328	42.511966352285015	40.81034642837461	40.65551482160829	41.88407881453703	43.915088188492454	44.95754670829061	48.02374665995876	48.011647836251115	45.90795447669103	44.09401104715755	39.80493201230436	40.84980589862477	36.09555696102026	37.32896557431405	37.28349714684187	32.956533636077204	34.162555629039545	29.780053254513593	32.216033706203724	36.98336025431749	30.704718285567214	32.73325558279829	31.715280314097168	36.184968523332074	31.104968056499025	30.19266722878551	27.432884072920462	27.36675291334555	27.11578311147403	29.656124738844685	23.425688527365566	23.784667342256785	19.052735515335797	30.54731790893291	35.500733130876554	17.33896550937219	15.35046006522762	21.001390248343057	18.66765550561066	26.2201643539573	30.69219084994624	40.4491553280335	32.91760772119896
62.39998823943218	49.93086662758772	56.56230063573837	57.31149891833015	61.96014655495422	61.421707763615004	53.90867046960038	48.85886979932392	47.023594341328696	46.70461154176633	47.977149986498695	50.0858694335631	50.99270743215331	54.14733893448928	53.72183607383128	51.50339000332701	49.893938351605726	45.77044363333989	46.53470724485616	42.01484792547681	43.15216883618733	42.94128841154096	38.694461790735595	40.06952299810174	35.43167129941383	37.66603521960338	43.31911394493417	37.02206599108821	39.00034626603514	37.92532838088272	42.33035244384137	37.25211147996217	36.414780961901926	33.599286918023495	33.64643622466377	33.46025575242096	35.98165014741295	29.707067181449226	30.12470575399705	25.295083989070125	36.510618129222266	41.48306731519283	20.979030938644385	17.413327693940317	24.611162020227003	23.17093272582495	32.04237323670031	36.79974879606432	46.65484243402924	38.28071977290273
61.223061883856495	47.69684962505799	55.09840847808795	55.40441269610993	59.88066710610085	60.96603102712466	53.97201377424154	49.97053890452767	46.84103237090045	45.83406438615509	47.243566815460994	49.6404077720832	49.9926207159869	53.43297902503657	51.7382929275232	49.287496233302434	48.20517370578687	44.64144471287708	44.62582195458716	40.838216123864214	41.675281787573425	41.05717104525311	37.13360570939684	38.91364711244442	33.7929790868159	35.50021444145237	44.18532837972464	37.79669933342007	39.314564643807714	37.94662796201531	41.93147090453229	37.007995182429056	36.5467616340089	33.57504917256799	34.21967546522131	34.77465138367157	37.91312158211474	32.17236626774289	31.4539091505214	28.12507604816448	35.6443694629052	44.86031772214376	27.10435904311259	24.18054404062034	30.806901452405974	28.720682960537918	35.89994971236058	39.86052179442924	49.21085595648529	42.87467994727158
66.64620104528868	53.40477335426841	60.60343606838419	61.042464751615	65.57310618179149	66.12114045647715	58.890426839236845	54.366454087474374	51.84255771725188	51.10663956827199	52.469630809798566	54.76133427870149	55.32682527036947	58.67118379318	57.389709787084755	54.99466958399459	53.76246213342738	50.00314711275655	50.23701192421469	46.20042362075461	47.14301352261932	46.64836023544736	42.606768618595055	44.25889576220965	39.27103609412881	41.14608542594615	48.685241974094104	42.30727092291948	44.057578962903776	42.81462284285095	47.0020693576238	41.98541248058325	41.35551220600326	38.43065422003305	38.80275180166312	38.98157382120745	41.793557746918786	35.6839150113385	35.62225285156849	31.36062104358101	40.86340257743324	47.82024259976255	27.510718827918023	23.737102455189003	31.101007888363547	29.763314994170358	38.46499943002202	43.02788412190918	52.75314360972719	44.84551205822071
70.07872879797752	56.35491411884043	63.91619831118288	64.12205425495152	68.53588134442779	69.89521397808952	62.9050640314721	58.7836203727121	55.77774934523881	54.74896802008816	56.16655895167848	58.57494283240175	58.88916634136103	62.35126487685642	60.44870395471421	57.94314665705156	56.99784058370216	53.53355487625594	53.384229261890866	49.73377196064061	50.5288901407248	49.83809525621544	45.99181677655006	47.81611976439558	42.65527048789006	44.251753951607014	53.02737299786282	46.63440496161218	48.215730507203375	46.8687298272046	50.868830152525	45.94155330707606	45.458306320631785	42.49197243305536	43.07417723074176	43.49180587883663	46.48071428514308	40.513190539639	40.145330489283324	36.271829666677405	44.57406158379654	52.86363183724286	32.79804316092242	28.97510126171523	36.37705229863359	35.05094532254247	43.58752894326804	47.99978170674243	57.60765683868234	50.08154137981094
74.98175517205827	61.06523536068255	68.77654896688799	68.87577382380748	73.22425428690961	74.93174476115671	68.02437656835745	63.99328328552405	60.88004319893801	59.75608887356555	61.1909705575885	63.6360897210205	63.860032498086326	67.36155075621086	65.20048745569304	62.648311782733785	61.83763990347559	58.50136907778293	58.19398825281613	54.710455005751506	55.44689170371232	54.67658486368107	50.921754239739755	52.80586211614219	47.59553956634506	49.073692859643074	58.227437817972216	51.835189679785344	53.383137387025236	52.01315534258708	55.95643496579346	51.0617848717159	50.61595512114282	47.64363237799182	48.26810744839041	48.71571093220906	51.7096414772511	45.72961749473891	45.37093269180774	41.47096651309816	49.62368621435515	58.02169423318128	37.479387761934134	33.47056952067015	40.97463784589169	39.878905540191106	48.696907889516275	53.18553125171174	62.823343461956604	55.06123917905332
76.33151746678294	62.57177965027407	70.1654888685347	70.35178829911206	74.748121098196	76.1329211001799	69.10125705542366	64.83965406612421	61.98762865895531	60.99541695747304	62.4090613946419	64.8052768513179	65.14043991900766	68.59640710210557	66.67749173893242	64.15878855917619	63.24397660235996	59.78533668421093	59.62488314486886	55.98496935664285	56.78186486430055	56.083307499566494	52.24497721254604	54.065986965749524	48.9084755442475	50.49329531404014	59.1147615537791	52.723995245897996	54.36680473890172	53.04772580473707	57.0884778211703	52.14211843771796	51.62344405688408	48.66565522039071	49.182705971468984	49.49093353853947	52.36651764815025	46.27593784759364	46.13453823401778	41.94986625107904	50.8112593914899	58.3509396935349	37.23484104160107	33.09655735508072	40.6400841774362	39.7649528335056	48.93666759294424	53.59771412187214	63.34442759599811	55.08409633725608
79.8751026527624	65.70573969017937	73.61479551626367	73.55718234371177	77.803065454405	80.04557604524643	73.30004454147122	69.49357518423247	66.13045115920042	64.84132420439093	66.30243568639384	68.80731919403502	68.87891698418073	72.43962874279373	69.88782369560238	67.2769860810455	66.6603111064157	63.52581218533119	62.98287904664251	59.75742084403297	60.40189345974887	59.51721676514807	55.907531405042086	57.87802778728882	52.607474673907596	53.91091646754456	63.70039185316137	57.31544104522721	58.77673053594845	57.35881245227335	61.18674737602609	56.36097325997397	55.99147446068183	53.011010418813655	53.73274288510738	54.284841163271686	57.34654539938014	51.423036631073735	50.952405342124	47.19158838983318	54.800536373706464	63.77287927695647	43.16299016252882	39.0914997540813	46.62032990862415	45.60777536448555	54.46171632276314	58.91919855512547	68.51684803807774	60.82136007501866
31.85572653646096	17.042184194672537	25.510567647893247	24.886153752124315	28.94989369493567	33.48799608314381	29.22206999434278	30.40518573305935	23.09367742671157	19.747354487238503	21.232125538111134	24.035067969521823	22.379150540170837	26.130791221358482	21.283755236155415	18.555801000982854	18.804319650237087	17.974547288004885	15.216524428243043	15.715955350797655	14.843958738592713	12.861890083744047	13.119952869712034	15.17394465262033	13.430542634236872	10.635294920074521	25.934140410795067	23.19350788257572	21.627450205187888	20.07068841511331	19.49949203198196	18.81745690398014	20.342604707107125	19.770494086970032	22.026720682037684	24.917258751037487	27.976789237108928	28.99793964614361	24.9629133227692	30.155881220097285	16.173104080391894	37.18869400585158	40.96547813829198	42.38736545808049	42.85381682454132	39.33989724756654	35.1469034222456	33.352616946647245	36.114470577274595	41.64101826376459
36.315652058377324	21.76774173245834	30.27981251993968	28.71165577985236	31.773898614508546	39.05225275183118	36.10790240964779	38.237438456657316	30.64443985635348	26.997563044350994	28.3535495199529	31.031499321475476	28.747701262787654	32.29294389008669	25.60755887706312	22.88828464890587	24.542035304482553	25.241242747159152	21.582601022910165	23.62489639940132	22.474694206305617	20.36531233523864	21.277391614264673	23.286330255783103	21.19794878261993	18.66955631799491	34.018411604064646	31.291491502158664	29.78440548367924	28.2138300283719	27.495968164319716	26.938323770966385	28.417279765998526	27.556550856623787	29.859243918132048	32.74199153823031	35.976152834189165	36.384571310575616	32.36726531007592	36.89755480267178	24.232915736375674	45.28695856097109	46.888923139006565	47.65786893855953	49.19380453117776	45.66022702054014	42.686540187885775	41.31243314168609	44.250991419952925	49.46625009892294
42.64484984783485	29.244722022868167	36.50190841014533	36.85897930331726	41.396616163243074	42.626738258048384	36.06988277013289	33.4019731005685	28.882437654355332	27.42225316831656	28.8853848392403	31.42327945817114	31.49141528104363	35.02256906762129	33.20572862439851	30.8323374156179	29.612515812403853	26.13283401996356	26.057098298783878	22.348244324548848	23.094869369404368	22.47487072430998	18.559083487095293	20.459480576532542	15.226541305407553	16.965207894920503	27.591930271310762	21.654833544367083	22.286822578498654	20.627672713125442	23.92823184995927	19.421596651409264	19.514567176791083	16.677426288155203	18.267725210107713	20.196048797765712	24.02179113547739	21.048541721315715	17.836375270408773	19.78211202655248	17.480735780651024	33.205784536631214	28.547206449514256	29.20304833011358	31.10309956863662	27.605167722650098	27.243304342166788	28.217040079145082	35.22621437723555	34.82356596701736
39.19161310167487	25.644184448647284	33.00294872815222	33.28606134705896	37.80475312817147	39.37838445125889	33.10485203650681	31.10599299187789	25.951468678913656	24.17980327069861	25.67856811108178	28.302457598274742	28.146791199078947	31.745776612896528	29.626429832789235	27.232738340166733	26.08629714636335	22.8013458964722	22.497639373262235	19.064089347883304	19.66868550688711	18.931066752237694	15.17248173907137	17.239323341133595	11.906838302746053	13.380009061175755	25.417877644749744	19.968178442329645	20.075929317308997	18.31607443048452	21.044126917341636	16.987184017041102	17.45456602854799	14.960878100479377	16.970917131151406	19.393402954190563	23.191240329483136	21.492156586792632	17.759727470244314	21.217732870923204	14.652343398217422	32.67589250056811	31.078942353651403	32.1451791378781	33.33605437013803	29.802941101866132	27.87069011820126	27.918435525014868	33.88035649022444	35.21698496493744
54.32779406681609	39.99859106610685	48.022357105295896	47.858552738934236	52.08302318667383	54.876681621161566	48.67829154916938	46.14539437752035	41.510519180467995	39.716635443265574	41.23096039114346	43.87981724110152	43.57078804721078	47.23408090247935	44.194539181079605	41.56565448303916	41.070361766279625	38.270548457030635	37.370982177930784	34.594926020971855	35.0337863757709	33.97669121653553	30.650807451190037	32.807762854321766	27.468189356620538	28.403108343855255	40.31842383283217	34.24173801643541	35.03746032552201	33.39183165480566	36.5778139628294	32.18452402350749	32.25056787068663	29.35925258971453	30.72995454081704	32.22295436017842	35.90766271991723	31.486426710654314	29.31247348500667	28.515323545268796	30.13631386457292	44.415179808886755	32.23531455288101	30.659939318468588	35.71937716903654	32.80025801872054	36.77786936621292	39.275980893698836	47.37374303520127	44.372054775789955
61.44360285802107	46.941981430329704	55.11457905724074	54.81078975649332	58.918775876238286	62.13062957165514	55.99127100367611	53.383910607284434	48.82498574463568	46.99579062848835	48.5160039903419	51.17841838632646	50.805181841265124	54.48853397647198	51.1663228162764	48.489694437380074	48.178037589327666	45.52709005925039	44.468873518873	41.87579799110385	42.26653518910345	41.1369084637936	37.922308114888054	40.10398103673709	34.76525900466343	35.5998472439977	47.54554481707157	41.3983186200759	42.290979351046964	40.66526982118062	43.892545002390726	39.474537602401966	39.49430311102867	36.57697041494546	37.850124117840764	39.17215222885907	42.76495387220522	37.91390839787023	36.12707369317907	34.50764537526304	37.45032365382413	50.90343180156181	35.98572613664924	33.48145373341596	39.65245612768114	37.17767710905665	42.72423800147692	45.766340642595914	54.26621288174533	50.14589409104164
66.38629709224702	51.9299744294623	60.065776745961	59.798955411676346	63.92228294554487	66.97547728320268	60.69487772096448	57.787061617588314	53.51310348048288	51.80664582515882	53.316129381931276	55.94732748810619	55.671261181306924	59.333119459394865	56.15007774298399	53.48123064666028	53.12179943531799	50.36972711128027	49.41548386076127	46.68497124117234	47.13392643947447	46.054416301972616	42.746727206129776	44.88338863008587	39.54562201813733	40.49411713799819	51.9383706646283	45.695811417448056	46.74768901763909	45.16969377884575	48.56472586028583	44.024809156632706	43.93966955029231	40.98709771978639	42.113768484906245	43.227109826953544	46.69938482240449	41.48780760264579	40.06841179378123	37.780204423826746	42.11421416324353	54.425042397188435	37.624649765393514	34.56714305390835	41.327286358962596	39.22223383350403	45.843502380388756	49.32375924475567	58.18526012571143	53.05019906323867
73.37920522251521	58.833323382531454	67.04678341887599	66.69911552602684	70.74886524630145	74.04760186571785	67.79489423287524	64.83140382187688	60.613192228188524	58.89024723702818	60.40296190023165	63.041218374409254	62.731943542338826	66.4048560546207	63.064775978708184	60.37197176532224	60.1140681251724	57.441493825796975	56.404170938844565	53.768458957736485	54.193081579350654	53.076683152944796	49.82460285475452	51.974165859958006	46.635334490687086	47.53536049808517	58.982644918417115	52.712259883702316	53.81406941617768	52.24840370044444	55.664656732847845	51.112891924940385	51.00481282823967	48.045013445731065	49.12238449666504	50.144950346192594	53.54805177847361	48.14873260502547	46.94005323929669	44.27461182110655	49.2141344394356	60.998782259312364	42.81888006164871	39.307814405335264	46.486801993206456	44.752585467842465	52.17195109535257	55.939407969728784	65.00129132825975	59.169144460639714
68.61797933917362	53.86574594343014	62.265352385251155	61.69180832101746	65.56844287569047	69.66785862787306	63.843055183009845	61.56793610020126	56.71948643183859	54.66656543338445	56.2055041915741	58.925063241089006	58.315346371935895	62.04782511405077	58.107112455576114	55.36699161089611	55.39941801079641	53.125180315931146	51.695697417255	49.57268425337206	49.81122504011465	48.51644759263614	45.6052314840091	47.87271406820079	42.562163293771334	43.10340056569598	55.745328698753006	49.66254829845301	50.45550516323096	48.795155387294756	51.825793214978184	47.56599476739171	47.67410115681892	44.78848119678538	46.135582441285145	47.51789368589304	51.12557555076069	46.25795369995722	44.489390931356105	42.774664263432335	45.41994746399165	59.24579465323994	43.31269521943283	40.33783026304409	47.01397522627967	44.808180824172034	50.95056609104489	54.11229931985225	62.625317835513435	58.2932168963822
70.30784176159109	55.4090639439086	63.974901881568584	63.10835968734975	66.71003010936718	71.80282611870443	66.46602800678937	64.82974495808877	59.456631832136054	57.08932182793133	58.64092498220394	61.420678792102635	60.49299633065794	64.26078858361251	59.62187690583142	56.84375289567283	57.25355682822351	55.46452953045105	53.597475632680364	52.0815029250453	52.11683700760845	50.635579053690606	48.14261334968582	50.500407121220626	45.29701029893036	45.44984327341483	59.074521340663225	53.19932586929471	53.73600949044121	52.014527858871965	54.66403746743601	50.71953489546116	51.009579104608946	48.22139475160301	49.76076014078096	51.3863010549845	55.09640041438856	50.6029027039635	48.51108786014631	47.366222525728105	48.3796223371025	63.570252884834865	48.66673173420027	45.831279441120564	52.35989604000546	50.02481997751785	55.611022398549615	58.42750038902346	66.5422548986251	63.07456081890203
46.09357644868209	31.308123269909977	39.74149388954138	39.136869170346465	43.0748907772646	47.398589377449326	42.176854956297134	41.29768000613069	35.291418520122704	32.72849122449668	34.280788289507385	37.078977134715885	36.08187302044924	39.8494997555045	35.54937966556972	32.810264678610366	32.92457860513041	31.078437533022363	29.240818246162554	27.79058760070963	27.72850516400416	26.224534301564763	23.9098167253003	26.320758461111126	21.346581939118202	21.108219214055378	35.78279802457038	30.60837555854389	30.49538843420237	28.70323160874194	30.6577843736527	27.318304452362803	28.002041340958105	25.62403362803992	27.63341391504853	29.966496289357245	33.79193253948055	31.317836504236446	27.963323902472485	29.90178266206226	24.692214464063593	43.19787344128848	37.304375659711475	36.97308572019314	40.29024889926231	36.9179371807525	37.519478082376686	38.313703321021606	44.5434101611853	45.10157308588872
46.43957984599698	31.913297263788213	40.10116390828727	39.78226851048171	43.93288988460652	47.32949560837521	41.62193704210578	40.07378541560876	34.572098204091745	32.34818910816743	33.89228342889467	36.635605241453526	35.977429733598896	39.70723333641569	36.13442603759391	33.46573085854274	33.178714988406014	30.789079254222198	29.467618006867916	27.276776796213667	27.47094252614238	26.203258543961937	23.31495882215826	25.636202672320834	20.402617500799188	20.762864846363744	34.40696598680853	28.874386605041924	29.066236315001305	27.3029317465863	29.769013946405614	25.963127794477096	26.434330250652224	23.840904351921495	25.68893047215782	27.823110271826476	31.65953644486873	28.716072598307107	25.563976031515264	27.024946424907903	23.5200307136973	40.921165587091316	34.15143943478258	33.8172036452762	37.16204449821599	33.8077653892107	34.80955606109084	35.94504716287625	42.6912054229018	42.437785320289514
38.860173649628386	24.2072826531399	32.508712375710104	32.07372284465084	36.19199429773923	40.05862464668261	34.91516853027241	34.51780262892545	28.133781961178475	25.428641599826747	26.979612012869737	29.788339345430852	28.73888204878552	32.50663855459441	28.43990453860289	25.74861058240517	25.640735841227162	23.75901995108722	21.941874640647526	20.566734071809357	20.41009304742277	18.881576711570638	16.78149493683802	19.218483758411786	14.649115335130038	13.873000390049897	29.236702519688876	24.72592658273723	24.118205927000393	22.331109121772	23.66006508814078	20.92284237074913	21.91558919441415	20.047675846861072	22.29099288802563	24.979530964174018	28.642185536979806	27.62602333519124	23.77798836642629	27.449844005741138	18.135613600322415	38.1951795052125	36.969767406869764	37.66051628855052	39.398949358120724	35.87566093841032	34.014213143271334	33.65253730465055	38.61405356830999	41.249325727769595
35.948593897464235	21.029142311393574	29.659656774586477	28.674378446893854	32.37914368033378	37.93617129550251	33.92634749785168	35.0295162890403	27.80542379144443	24.468554683186806	25.94683333363904	28.74315523097296	26.975958183340026	30.699808320226897	25.210241145602097	22.42604622927893	23.19466068063341	22.694301393594603	19.740480695135787	20.362805545484015	19.563225961085678	17.584871121269472	17.388837440866308	19.635587557701015	16.732959440025788	14.522288299786519	30.365491350436237	27.03028613707849	25.772302140769646	24.107592389884694	24.06482498125947	22.768078037746506	24.135060430837033	23.009292252824977	25.322747094592437	28.183467901746702	31.544970331397657	31.642313798675417	27.640904960077396	32.08265071926573	19.976175091428527	40.97006798173816	42.13282097813363	43.01412950905415	44.39527473908481	40.86097629473033	37.97196610763025	36.822965797386296	40.392396665953896	44.86096251801089
34.08413092332331	19.187073198383864	27.75980988051843	26.951764915360176	30.83943448684402	35.88448859836838	31.713665730748385	32.79163916512873	25.556369106277597	22.237861238854595	23.72410764902587	26.52695598590992	24.83526793318263	28.57685786482034	23.411792609435256	20.645008548701615	21.162736110639884	20.465744147816558	17.634074344647402	18.11776111885729	17.316979550390066	15.351728541063643	15.23038916642082	17.431253870051727	14.878244530778288	12.44564759806384	28.18040674581146	25.04621343696319	23.6763870782804	22.04513089284409	21.838326416339594	20.731542632275534	22.159081664641086	21.2354044463499	23.53794685027042	26.42077886356119	29.672206975704288	30.144468324670694	26.11457255397376	30.894090060311054	17.978248751775727	39.02653323496421	41.31075615192313	42.442802920591696	43.407935216172355	39.87615828152517	36.41316932937639	34.99753196805959	38.26331271960847	43.14700109576213
32.566723656239915	18.107239827366023	26.22267648505802	25.959412043253618	30.24833175793055	33.72101932176018	28.805217021292776	29.20693791199242	22.271027292550798	19.272812869854654	20.81210501805471	23.634826301269115	22.41798886052826	26.189760691493962	22.2941160488653	19.682846344060025	19.319763106537238	17.554506589060104	15.61275213375016	14.685138221668387	14.233650095727631	12.567500600478539	11.412075977744436	13.726659398713274	11.05854939382127	8.533531277299652	24.397954998755175	21.128221516425008	19.781707879062694	18.133808825770323	18.210294830439462	16.813676584140623	18.243085948607153	17.432108249122145	19.71622294256387	22.606826824288692	25.785973384634396	26.558950995725272	22.521398263890802	27.666374564482343	14.060519534991503	35.11292594162519	38.50045519758352	39.98170586469506	40.36721834983363	36.85487710350706	32.74624999469289	31.130734968343297	34.39617749758344	39.342950582426475
29.560790325310155	15.402428465961469	23.235046440942195	23.16238891676927	27.586660297026686	30.605093095112323	25.74839470628432	26.576191759711293	19.370395695667465	16.21480831340404	17.742997047250213	20.566317461522374	19.295672688649844	23.06721725786869	19.487157806595878	16.99310468023413	16.295505279732712	14.475483665992511	12.58596737858426	11.894880883088	11.19524264675662	9.445989989402232	9.521749684547082	11.364176761094523	11.027602025461583	8.14739462695806	22.108685988313752	19.718179371584988	17.954993715572435	16.489933247320963	15.656026844066098	15.326592540282668	16.948575870370433	16.878527066458417	19.007896739430155	21.85670037041351	24.642333299603646	26.35997170706498	22.386469365004444	28.075419389683084	12.908066655287348	33.65781047031007	39.32532247641829	41.160553773422116	40.900507962660896	37.439599401290394	32.28757052420224	30.042252445700512	32.330670081651746	38.45437112433515
25.54282015800864	11.122872116621764	19.190584485525143	18.91782045835106	23.30804074276976	27.050429385368847	23.152375204234826	25.508370429091954	17.73146590982357	13.990564730708154	15.329735243635321	18.02799444080524	16.026821511492013	19.745926707035743	15.244733624570134	12.713397384657526	12.377921719926443	12.256354101230615	8.790235331597927	11.68005742490092	10.024586616241185	8.136426951126118	12.042024082457786	12.4538146058919	14.74998536083334	12.236480989841478	22.021230888801863	21.28704340675924	19.00793622898043	17.964016458530853	15.442442855246696	17.148865612737946	18.871719733388773	19.645407108944298	21.48700223840237	24.1565761970464	26.354464440080328	29.11160396406094	25.30243977606622	31.348454934801367	15.461783650432952	34.70832414073041	42.828689563986224	44.90989332834169	44.15766614650099	40.762976758880306	34.65606924199406	31.68326555856771	32.378087091335175	40.223739029920615
41.40903882759882	26.518404866895466	35.166756461338544	34.005887253728254	37.466162863396825	43.549535546530166	39.537264152275576	40.31019159346922	33.28696018578593	30.049062100326168	31.543230858062095	34.34956206780393	32.62056293307625	36.342612012256495	30.63787312161293	27.853056521528018	28.807807296133983	28.28042391459852	25.38250331598493	25.751596065387123	25.089517863716992	23.164162966963477	22.45489244743938	24.820570572644236	21.08816090909692	19.466898388386674	35.3869916086264	31.414927753777594	30.51241634936347	28.76765630670148	29.313102757120546	27.375884576235222	28.546721168914978	26.919075362949368	29.196500655786792	31.93458968491688	35.54388809436843	34.62198280041372	30.789491035945428	34.253833358764474	24.54348870360313	45.08823161086639	43.16422347050003	43.389134408643706	45.82327248658925	42.33326947607834	41.008846230039154	40.621741623273536	45.14294356676526	48.26159780770334
48.63918850301182	33.721303793250584	42.35367800943454	41.30750092651743	44.82289218406321	50.54531707309331	46.021468922109065	45.906207646225134	39.41300124754808	36.4872044546818	38.02213578733525	40.845702622436825	39.42374459337855	43.185131317209496	37.888294760377974	35.10206149022857	35.8270452339558	34.75722299637784	32.279957011843464	31.81372881605063	31.450055896402905	29.695724535634994	28.130900090774354	30.568764006997295	25.991273170735774	25.170933760828216	40.58162364016172	35.75092958943385	35.3924281739892	33.59646931080226	35.034214737645	32.191675736717215	33.041262263099576	30.846542652992223	32.943658388524	35.381581032925084	39.18607930594882	36.91539734139816	33.50477549325657	35.50283129303258	29.452285844763	48.65261674520211	42.53195449472201	41.89328895731303	45.62955664973709	42.31001526760229	43.13212224772017	43.82258597060456	49.707187051774646	50.70616065619416
57.293396102892864	42.3905948864585	50.964595245575666	50.091875975029595	53.732486197366676	58.87485607760886	53.7855270424012	52.71828491270391	46.88997515740665	44.32662396142906	45.878504344938676	48.68135076744539	47.60153812431596	51.37414473142884	46.60233337339383	43.82423557711658	44.27162576898118	42.663821064247	40.63294003083892	39.39984203628832	39.314549848406166	37.75276071164264	35.51233867076678	37.915615076493815	32.860066291883044	32.716185320394715	47.094037834485164	41.57575636841085	41.75977977063755	39.98799618191246	42.21459683013659	38.63413267886371	39.14385836704887	36.54134564333244	38.33812340860055	40.34187708213305	44.162972779417004	40.59006472438774	37.837905993786286	38.130695822759584	36.11586030592588	53.21964381765228	42.50152276967087	40.81070620050505	45.98474536680275	43.03508694893606	46.30339683664201	48.14860584827989	55.33870432622882	53.96276805844209
22.415665074307263	8.921865900875385	16.499389140683846	14.819955358241193	18.305086914191023	25.47439684249875	24.1408179711923	28.715142788687018	20.920699386659876	17.10905082830643	17.818512155424322	19.76698309643216	16.623856875383982	19.510929255864866	11.79849696310696	9.300196674131984	12.248661199212496	15.915765042329534	11.797429988163639	17.30306300383431	15.502054612773573	14.286242921827359	18.50059636057873	18.569207314348162	21.187388113068046	18.514793600664454	26.545535724720715	27.11583413767507	24.61813672067414	23.86873584312025	20.450916883422835	23.252160930656263	24.959123083746313	26.02114146409414	27.747460809763666	30.303607014870042	32.142042548318	35.405490213088825	31.67527601609969	37.79262492839209	21.84993624222907	39.84736578747622	49.30009151835143	51.378727158368754	50.58267527938862	47.206784784194724	40.73300543179801	37.33279244194307	36.60393102475043	45.87069736971454
26.15736122280747	11.62845493562233	20.075061615659656	18.63952117185545	22.155584136640027	28.884439520577207	26.61387244693339	30.138576757095123	22.24900488357322	18.35949424079842	19.428536452931425	21.809475355787033	19.063014525805514	22.383152958768733	15.411812644448869	12.683217825544807	14.66503826066291	16.80883571438105	12.53279963771123	16.91439365473397	15.20636826635903	13.382978467294862	16.880091617375395	17.65680485638663	18.98369745417708	16.076896056144392	27.102842084332593	26.513263741967375	24.25619374924061	23.18595870435226	20.59728060373972	22.313741374710034	24.03225049864194	24.54878197252756	26.517626543933204	29.257940893342102	31.578064288230834	34.06663527708068	30.1653330272927	35.99990263651021	20.398915540486712	39.94266091995611	47.28282140423866	49.07010945920368	48.83111703683764	45.381684200144484	39.76610311572398	36.92053910781355	37.41878171114149	45.456018002432515
21.17568425816819	11.49682904741544	16.110893582609812	13.561775023517722	15.8417726916923	25.102037686339482	25.310640566836145	30.838437016433925	23.31206369056046	19.719843880471565	20.12034027493285	21.58036560262791	18.196614943102443	20.329992111106304	11.91803178647462	10.78648781070875	14.324779751449958	18.818039059154657	15.075471003486088	20.729544481042694	18.94842664424015	17.91781059833474	22.19292393804964	22.12638490616614	24.91472535431991	22.234502201520332	29.33325727017553	30.476735850209675	27.907715683040177	27.290422721600432	23.58326160685677	26.76306446251813	28.451891251169645	29.651054563606493	31.31100769229276	33.80024606812405	35.45029474821115	38.970786085097124	35.29422792086157	41.458233663147865	25.496298375963704	42.78202461714001	52.993233983237346	55.10129521243202	54.227171510309695	50.86890796201813	44.162951334555764	40.54451333006086	39.10020141702103	49.04865632570934
23.769441966055638	17.104329047127933	20.12141857993221	17.058710314484692	17.08128761977118	28.538312061510226	30.13255523119195	36.172238078190276	28.80272307455089	25.288190335130633	25.607699313890336	26.854583651919945	23.428826195587185	25.043651323777663	16.82822415046273	16.312263465987513	19.837789124328342	24.42404207662422	20.636145228667928	26.252691994409552	24.458318063623437	23.267996473620425	27.406201969560787	27.559988088404438	29.889271775683614	27.05942448194485	34.91043715246392	36.03772301048572	33.489356167845614	32.82263286655305	29.18704064666561	32.238172338877234	33.941349708976716	34.98880718764249	36.73776799826824	39.28834870379903	41.030767603711176	44.39480189296303	40.64636769340058	46.7120349249203	30.809578999440454	48.37541747816451	58.15135357432587	60.07450659550237	59.52365655420538	56.12566305042066	49.69692970865969	46.14560792830767	44.5716381460845	54.65410010385979
26.76899646089986	20.722732339274046	23.636086563167105	20.516310417064343	19.82325956137099	31.774702349684205	33.77359130606339	39.88689213098623	32.50801207227405	28.964475986651678	29.312687245503696	30.567791519201055	27.141019492042773	28.67687324473425	20.52760985099176	20.000860711906803	23.533892642321643	28.051195632145394	24.157579783538427	29.70869195957788	27.90721583491204	26.5862988746982	30.586292417019717	30.920854795285255	32.87263670632878	29.968758578991267	38.58111391778051	39.52155594216068	37.01095572058462	36.27187556702689	32.76705451982636	35.62308671450076	37.33747950527423	38.231590696979296	40.060409377020015	42.67204072225753	44.54266115091156	47.6986330338662	43.885593265368726	49.844619153878284	34.048564196768126	52.02775961210168	61.17425796992106	62.93169828373164	62.67508185389073	59.24335182758328	53.12669346779753	49.70510920888642	48.28228034047311	58.230087681443365
27.09050984255423	12.261512640629986	20.7539707956115	20.116894058721936	24.265062706296835	28.9178934085399	25.2816888735854	27.621611997401768	19.876054938941692	16.151787826124057	17.48918619804912	20.174639692053148	18.06525521104458	21.7405424119087	16.50275869828439	13.788112394908795	14.176180395544788	14.41280773564214	10.808332773152905	13.484717627114666	11.976174182375331	9.906660963586518	12.909065923727319	13.90190332160207	15.027044779585442	12.175695972643865	23.963233570188347	22.74699223973726	20.622019916450892	19.422823420968687	17.349706521188246	18.465345155297495	20.17159995990386	20.566622229653802	22.56676670910954	25.33682830819664	27.791973090953395	30.08610942213254	26.17335594605863	32.00972078796077	16.43354584106569	36.40189048292484	43.32693519906068	45.18988480893589	44.84163345162898	41.397703611158136	35.83887367516019	33.16704226423339	34.327246047773556	41.67642955587277
28.44014591981124	13.533672229905758	22.18152343852143	21.152126450883006	24.96966038761911	30.658332700622914	27.439686981669617	29.967608943763075	22.204120142618684	18.44649213516509	19.745289585119117	22.382727614677968	20.093073340390927	23.685823269787928	17.686478672880924	14.900848437221697	15.976866109316482	16.724863345002515	12.91377798052073	15.783583053176132	14.317644558742492	12.23035308700529	14.762773612796874	16.050268736521378	16.365621130944035	13.393068788912752	26.28582304007422	24.825461108202035	22.80008322564301	21.519475055564747	19.66827081638111	20.483870759043892	22.164441098848407	22.290406412593438	24.388304326616257	27.21286270190584	29.836710915123103	31.780956001796987	27.807276241491056	33.43274855437581	18.256277902688765	38.59340121907975	44.56001102880977	46.21017731855702	46.24045319216317	42.76123800773057	37.677539595850895	35.2295876843033	36.64783387127473	43.704429711120724
29.337226432786856	14.83591654969769	23.292108366589982	21.765126373805675	25.055995532667463	32.10587386753291	29.62114771383898	32.663635078221546	24.82637537669847	20.989401763754366	22.186144556209452	24.69961768823526	22.116428587410965	25.52648309148378	18.61766731797379	15.903771881223832	17.775865383079026	19.328856388004766	15.239267350411591	18.707374149586933	17.17494738069182	15.127162911166982	17.71315777562367	19.031084191372933	19.10007116803405	16.125285810440133	29.176929768224	27.805416994505684	25.779436502999765	24.501452574698515	22.567963685497272	23.457415197419174	25.131884522070834	25.16830908202724	27.301023892104634	30.141736317956823	32.81071279311081	34.624279800155996	30.627006674268895	36.1140680157296	21.184498984960598	41.57218536421585	47.08332043400496	48.56080546781007	48.88200657490291	45.383160463167464	40.58252049884693	38.20557688295025	39.540843978863876	46.67223755720023
24.79258023559248	11.783813072459672	19.12786970978311	17.106636618578833	19.97166218504611	28.16613714695578	27.0363369909187	31.47055189131544	23.6260374473446	19.765234356172233	20.578493279416527	22.620789922859775	19.512679296955145	22.39037904917318	14.470342172751467	12.15487266226895	15.116900643825264	18.43996101235411	14.161911846359791	19.295580616162475	17.51089004622358	15.947607397952266	19.79658030008096	20.29879863088761	22.082110379658143	19.209292148682056	29.024648408382426	29.072228279923443	26.686496626685216	25.766882004642323	22.728682953405503	25.004733014688906	26.727365716604357	27.459552456252425	29.346664106134046	32.022478577446435	34.13516695831761	36.954771856747	33.104924438841365	39.03479695642938	23.28229272673755	42.17228067290394	50.38141960630222	52.221182446881514	51.865639891121795	48.43355951762163	42.51927703065512	39.41548486420834	39.19907312847724	47.964621104522905
25.611018389418568	14.802903065845351	20.66142072408245	18.076281318756827	19.788036922844036	29.652756353683735	29.59781366871053	34.622275447372125	26.870213938071405	23.076072759485445	23.741513452616452	25.539233967869016	22.259422661885722	24.709319031553882	16.352856212828478	14.67933272698388	18.047632581438652	21.872437268352687	17.675928852123377	22.950926765672108	21.158762434222552	19.630911531097784	23.453410248516434	23.982736204747997	25.63461681246296	22.718094135037813	32.498875069435165	32.74346386391173	30.336483899079692	29.443087967263732	26.30846199502733	28.68928949099769	30.411841967043653	31.12275884394602	33.026059436325895	35.707017436858465	37.8034112303194	40.62589066546668	36.761193520262	42.64483541791995	26.9501773095996	45.74396801420898	53.93107547533709	55.67391523640126	55.476776971505124	52.03121090568109	46.20418965258683	43.06905316630211	42.57316764893298	51.61787890656562
22.799770987184317	13.805322569479452	18.19054926506434	15.408066847482678	16.82823011029886	27.054306411114013	27.662314028265943	33.25827867076509	25.717194987808405	22.093198708561214	22.528050009794736	23.99766988310325	20.60853617528225	22.646685228387557	14.24027839189696	13.196912706500363	16.73164908839982	21.131190149116016	17.24205026238846	22.83286976357615	21.035575877606284	19.829115375786742	23.980818184773508	24.12270063683418	26.513789529910184	23.717918791026165	31.692000795520894	32.63066342608679	30.099787564448246	29.402768338253534	25.83866828236275	28.804358364467078	30.509554120360953	31.5522936224821	33.299154207954274	35.85537295945924	37.637275170989	40.95590688274479	37.20945162147716	43.28734936185724	27.37421830893172	45.11594538295643	54.74658960760457	56.71671319984548	56.09418286180414	52.70181377813982	46.274214815468106	42.78173210471195	41.505496844260996	51.303380462534264
21.03398160715713	13.096062575068462	16.52475256637308	13.676857181857436	15.127183869927766	25.32737471710073	26.20324584744405	32.06575257951578	24.675402056863835	21.181486398434096	21.48052260034778	22.75717678430166	19.337713530984203	21.146925939006934	12.801507434015148	12.20136382295135	15.716300036085258	20.372264504305164	16.747385915179024	22.414985737793867	20.641982486546272	19.648980825718866	23.930865594533106	23.84061279574041	26.64853641049705	23.955467004524355	30.804972016353574	32.13166811748099	29.54429988129479	28.965911555961018	25.181881765722082	28.462889198863312	30.145856018595527	31.378126211162577	33.022111093017415	35.49246510263097	37.08480643223624	40.68036802203079	37.01794628318618	43.1913904423412	27.227392883811095	44.28258254466291	54.73059294034526	56.83853059189596	55.95534568244419	52.601030823930095	45.83145096630332	42.1436530175415	40.444476641727256	50.63105696948996
20.90706017437285	16.098864932114996	17.59899199281562	14.46544657141794	14.183464755135462	25.77012393299895	27.83339612875271	34.246356303146456	27.154578735550494	23.86379716007561	23.98575771131922	24.93205715779454	21.51130334943331	22.73521867086986	14.858794816440648	14.989046344023636	18.365605263446078	23.222089609427805	19.828559660417696	25.502520985925813	23.75099566078321	22.850328534016555	27.15861980794569	26.991164329344187	29.90237533074959	27.211962465158525	33.44729626338435	35.135742660029784	32.513980593528956	32.0196315521867	28.087876963010647	31.57296102227367	33.240177194039234	34.558953520654185	36.156553709118555	38.57773225013621	40.03798513474301	43.806767094462685	40.186111935853376	46.39097151640862	30.42340424685113	46.9473549525092	57.95041817403036	60.08598564983331	59.13433455502647	55.79521351409019	48.853219771805726	45.01496370366767	42.810250832218	53.45794145184727
29.451745176009286	16.835135236868425	24.073864787345048	21.792445025553494	23.946589532914015	33.13038931140289	32.12333568271514	36.26597895487808	28.37822138059628	24.48464914328971	25.432299828442677	27.611762052780623	24.578628803187435	27.49915097098142	19.48674387968221	17.261709182732062	20.15567009188259	23.012299904736793	18.69642071459547	23.173303251609685	21.488049613758847	19.60748188524699	22.713342864858163	23.786002996844253	24.27679603130174	21.298990095754068	33.390821701480526	32.6410377008615	30.466608020632606	29.314910922171098	26.887281059335862	28.358109832252495	30.059464022846683	30.271354494496734	32.360771569797095	35.17244691518671	37.68855428584266	39.75811664031416	35.775883284469934	41.30436107590421	26.223085121530985	46.20002814862561	52.25577164238398	53.66964077794515	54.07282043012825	50.57286133090042	45.65069701054597	43.06134657480847	43.694810147275085	51.57307335208297
32.31937254789624	23.730052816353112	28.497143739426456	25.519393870113053	25.529942433998237	37.07867766723583	38.14740077103758	43.52279683390948	35.80588750725119	32.02096030987536	32.663585561243465	34.35880259378422	31.013324648558218	33.12799090831437	24.725685864508463	23.47076995950215	26.92642434717961	30.804303771603095	26.570272689158934	31.657979882500705	29.892869952270864	28.199721806097003	31.63706641362967	32.50322989663432	33.32663882367025	30.34816756020691	41.42228594213677	41.35245462486953	39.043381594899834	38.02753805162876	35.153204210382	37.16096115533455	38.877968076066914	39.25551398457715	41.29980519918249	44.075752791210405	46.419409297420415	48.76251902137227	44.79765339411675	50.36105492243964	35.16064160343792	54.595906603624904	61.277055148580835	62.596184354072506	63.12632998010751	59.62368401784429	54.57781788672968	51.74638571635999	51.51827030959692	60.28916707272803
33.63474348327581	23.621349656635406	29.315052548646648	26.487888065292488	27.072631452042884	38.135231482939936	38.528493284607244	43.419675253635724	35.59248319321965	31.73521774331563	32.52178988356394	34.434300686044935	31.184019081365136	33.612269341036736	25.216849619751248	23.607251806484722	26.919331641461078	30.38590618908659	26.07935369411798	30.83670025997616	29.12117542254653	27.292210053426075	30.41289090013654	31.499840847308874	31.827043409987997	28.86270559740446	40.91241674456225	40.35745856344841	38.16318835717704	37.03062116226556	34.486309878196685	36.07559655830473	37.775522812775606	37.9255940964151	40.043400682264064	42.868505088965186	45.406474786431865	47.380464152442194	43.37695598591789	48.749685843901936	33.91265345454496	53.86448352008774	59.468910460411244	60.62978068858575	61.44263686159193	57.923602062965294	53.331126051664626	50.77759200810859	51.14495669779868	59.29114387692777
41.77718862170147	27.96507484373856	36.094005229151605	34.087942551160694	36.41212961818901	45.081644784523604	42.83985010609398	45.345910812498936	37.67917730879949	33.95808562227282	35.25586828690635	37.85843101240266	35.35193685088407	38.740749266311376	31.400157189891765	28.846892868500586	31.003824227539614	32.225298219430925	28.36637689795687	30.778052781718582	29.578524146138186	27.461383427118474	28.422320560756507	30.456870611616115	28.123123566431392	25.741534363050206	41.18960041151228	38.35170126683818	36.92268018167497	35.326603410850126	34.658353542145676	34.028603392492386	35.464051992775495	34.41462123895198	36.72816128383416	39.58688069626182	42.939309766990256	42.89884181268681	38.93604707560867	42.96742571050845	31.283737612579717	52.32867948965996	52.228226544525896	52.496324865071536	54.81711350698199	51.30976043705346	49.26380213860957	48.227721382074634	51.4189425198828	56.24472829400704
32.01647126437933	20.93891496478107	27.254647337142046	24.603053198500234	25.79293676084035	36.22188546379172	36.05900760103319	40.643567201577085	32.781293345496906	28.90256880580446	29.758282361009083	31.784885274357944	28.61136627953788	31.24284393036387	22.933298645929177	21.083205569783473	24.266147527052624	27.498112041252625	23.179707393611277	27.807713060972166	26.109254405732173	24.248695208006456	27.319845171120907	28.43098413610064	28.74292560038161	25.775662417573102	37.963618708012945	37.28397051377566	35.11165218289268	33.95861242191074	31.4950088739971	32.99215427637154	34.68958625477539	34.83056279422678	36.94805623866171	39.77427474737447	42.328502666897876	44.28865832521787	40.28757823836542	45.689986730925334	30.817938976952075	50.8371460371227	56.469076162063224	57.70084236610024	58.4030452137714	54.888000436801924	50.23562441994885	47.704213650303856	48.23526269448366	56.211937353441535
32.52083557237536	25.3356920526296	29.252600505827886	26.169824001767587	25.55601973104498	37.51750954990836	39.22078133030035	44.973380444664045	37.377753044160144	33.670649863458635	34.20113385363585	35.713771058064424	32.31692442251071	34.14516431918413	25.834497187560775	24.89430933648345	28.41318721596827	32.55792174488106	28.409556932848343	33.67393438162135	31.888210328600756	30.2894102827082	33.88869787453404	34.62588856651457	35.71372963775678	32.73756823583904	43.185959144283956	43.438683291973234	41.06475520371659	40.124892671518374	37.051285228960325	39.31409889362042	41.03593372356605	41.540954073365256	43.5401715238856	46.28228448481733	48.5045851300372	51.05926542391149	47.12099335786179	52.77442248954161	37.41260337374275	56.48082561437412	63.77420159524162	65.1578549102328	65.56528456494871	62.07246864894215	56.79063644952871	53.793607942329615	53.152365271922086	62.34267545380439
37.84613516684815	31.739113194522776	35.18621853524988	32.04824005926053	30.79281859930805	43.06792532209273	45.34502828461557	51.304018660458034	43.75967370297631	40.07423621384319	40.57623844171107	42.014979747365906	38.601865830463204	40.24957453941995	32.04516054531986	31.251838822099394	34.781875427006824	38.97593958055511	34.82901510906263	40.06705403346859	38.28616605204957	36.654324617544276	40.155809245087745	40.977792411898	41.83349995996516	38.855707509503425	49.60275888782716	49.81026588052843	47.458829820672435	46.490725746070424	43.468118572531544	45.651377231153376	47.37089054583399	47.77842182190206	49.81807032142979	52.586632445776985	54.87774368321858	57.28538807791084	53.31844452507435	58.84753579703617	43.680043316129535	62.90026249625185	69.67601531841775	70.87297992009854	71.58975163026396	68.07940853703627	63.09153391343573	60.18207468953851	59.54270878483231	68.73006663038413
42.09729778470067	32.94392408332338	38.30068798534478	35.343918554619584	35.22484716246062	46.905727438958955	47.776577389220236	52.7376151397213	44.89992001094832	41.03323235079613	41.840317259696484	43.75125718285422	40.484658332166724	42.81173355180376	34.39832143544079	32.9044617813301	36.23947300076746	39.651371297366296	35.334674761880564	39.89198937385901	38.22199330447688	36.31187404338283	39.09003249294505	40.39951238803355	40.0973821109817	37.20801636539393	50.11610051612546	49.20290872077082	47.128438855306044	45.89441764896863	43.624214157153624	44.8543257131111	46.52234143038008	46.37892957720392	48.58100449677495	51.45097997025478	54.2071442632008	55.67549378649371	51.63974190332603	56.61577376611514	42.519150175061036	62.89967699546864	66.80111619540688	67.51295022420899	69.0633592396224	65.52867909716579	61.79946916802241	59.60336998212074	60.39317977304572	68.05788475710787
40.06862018986116	28.666626046001404	35.34680798626138	32.699799838753364	33.686311214890154	44.32177279179413	43.92889514377256	48.02906240837058	40.137023359461004	36.24332925527195	37.24724212105113	39.45780776108807	36.40601487441486	39.208786935263774	30.974012060019138	28.985115731444857	31.994075999529578	34.70350488108845	30.4213096524958	34.37843242332997	32.82357883483441	30.795530484374247	33.08034360580895	34.63299815244278	33.73812991145026	30.93940203122223	44.829510196432075	43.27428915879164	41.38067033614847	40.017446520289504	38.230725392001084	38.88516695728699	40.502219109469195	40.09165798758245	42.344952240154264	45.23391971774788	48.19103519484328	49.21997595959152	45.183845982306465	49.92996483228891	36.398025753831625	57.164089071214576	59.91368612540751	60.538152371869266	62.25426529200288	58.72108988482213	55.4392350569536	53.58775086463594	55.18914972747946	61.94263714499241
42.90924345176733	30.34292660103756	37.75325318144197	35.342228237478736	36.86514876159516	46.806358227619725	45.60237468144416	48.96543963708499	41.132485913438124	37.28648207126444	38.44248331060774	40.85981227493532	38.03177308858354	41.12643077989317	33.188823505509745	30.92031583702286	33.59424996486529	35.63530269775545	31.49777662800206	34.74220544286109	33.349990685362926	31.24767101504523	32.866990715807646	34.69724229797794	32.989660206698844	30.400622169081906	45.25845816489986	42.99367840258474	41.348715243602385	39.847445704240165	38.64759111405918	38.614405101475384	40.13940150602214	39.35189208995398	41.65336545145858	44.537208895620026	47.74251468435826	48.11246814728734	44.11164276644259	48.38568070231626	35.9622203565652	56.98773161079907	57.8209092273329	58.12698703990303	60.36648065197002	56.85114787783475	54.441685817878714	53.09324202774653	55.59640668564503	61.261800947875855
40.14784194870364	27.54137586359368	34.950042871934286	32.56134822476487	34.18104489868384	44.00459998613025	42.81029749740554	46.27768933061444	38.426190833412534	34.56705651657914	35.700371710481974	38.09231169262466	35.23961925651152	38.318215647724266	30.379010670455326	28.109014375294777	30.80082506206716	32.93302516838905	28.76348013621447	32.16491310101546	30.728695925970374	28.638924481099018	30.458942006808403	32.20466264073997	30.785110506797896	28.10283488070069	42.681818327603736	40.63137079502548	38.89991265484749	37.441347495717494	36.06434781381223	36.240594215108224	37.80157851219139	37.15965066224639	39.44560888568386	42.33633545448881	45.44846424962107	46.09709148314353	42.074212618647	46.58944199431777	33.64221189690422	54.60560813371618	56.350307030103586	56.86527106741917	58.77329360359421	55.24506279898235	52.38272314981709	50.822870508356914	53.03561693723276	59.07245140103026
53.56045703992953	38.919796510963145	47.49778328836745	45.947781908152834	48.83273645091113	56.16773519591883	52.5255820481058	53.252868304689976	46.31589917351966	43.0633104338235	44.54691765678042	47.343695665734884	45.48190013196677	49.15659591276486	42.841120684974356	40.10416306602428	41.49550032004973	41.29104271692987	38.222190990903144	38.76683500341364	38.11851824171209	36.1770724687358	35.36393074770017	37.764789456779354	33.63535560931554	32.36279194384815	48.16905740844704	43.70409280634631	43.12041754981201	41.338336509905204	42.26632955254835	39.930671490911514	40.920132176759076	38.89974486676105	41.05961448612387	43.579239453907	47.356351415598105	45.25924294554825	41.809218417539654	43.828123009268225	37.12813622570426	56.86533504327876	50.42042082728339	49.44139650640618	53.63501622835632	50.384980524818715	51.48348455833759	52.090824382502184	57.62238469586843	59.0535471847028
48.25628490635864	34.425610534520374	42.59012855632499	40.568770495093226	42.78366209584735	51.573759125688014	49.174205769065765	51.309215924356664	43.774111704767485	40.13455690619225	41.48137077802266	44.13714397049841	41.73210717024985	45.17083266626227	37.89573620637598	35.33359541891887	37.419707079196996	38.379154783359574	34.65859390867265	36.63887270293577	35.574597047594686	33.47587048255524	33.92632552852891	36.112808411439005	33.13104398615516	31.075204518320305	46.872408704244144	43.49349794519944	42.32329787873936	40.64583882653804	40.458376625004	39.29217797104168	40.60014036787454	39.19264065690246	41.49100721780712	44.27088966862345	47.816309881243875	47.01982603546068	43.194608699046306	46.49507871579693	36.47970288185313	57.330616019295114	54.73620607882262	54.441842544105825	57.62403211207987	54.19392808042425	53.40463313865584	52.96381449676094	56.945813979694776	60.665222930707195
50.30100097258477	37.306489026603586	45.01198697355075	42.694067157956404	44.32485567025111	54.067332284643186	52.42800818816039	55.20392802182504	47.49715538216958	43.736396507573616	44.99338738421139	47.53572304148654	44.88271685829961	48.12946114354267	40.39177868906043	38.01269889473004	40.47420624239328	42.02193822341508	38.062245993082854	40.65884831169722	39.441899315665616	37.32325806762067	38.259193179737444	40.32690225854032	37.7720371522148	35.519609332689875	51.0677911482434	48.08370555118251	46.74356556347361	45.12007612895791	44.54033721423782	43.8005771743209	45.18887164867204	43.9646782446062	46.27534935625919	49.09620586879406	52.55724719809709	52.05680193376895	48.18059621495857	51.677419259434956	41.02440502474584	62.016827741765916	60.04346439799114	59.752514809450254	62.91455507539164	59.47592169741511	58.444999838127195	57.77898697777168	61.27955703334204	65.61913193148015
51.59119438335319	39.32444153584411	46.62032246383031	44.1136841595361	45.30635915719847	55.65829771874399	54.585559875330425	57.824819313321264	50.02633274662427	46.20154164763144	47.38496420504428	49.828143194225596	47.01504405375711	50.098842848063555	42.10159939352574	39.88069746067725	42.57770009127119	44.52908930893023	40.435818486733844	43.44594392104859	42.128965014264246	40.01411155421358	41.28702760264468	43.25608151027103	41.02761662643538	38.645250824343854	53.93153573639753	51.26069319566376	49.79438095531727	48.21818587769879	47.34891321838825	46.92986075325749	48.374234999970575	47.29697207281512	49.610962573578156	52.45829554543628	55.8428186571277	55.59521608301728	51.67962547738526	55.35569923226535	44.1929159904438	65.23979540964895	63.88565467818904	63.64284167766341	66.72234197558947	63.27069746938981	61.97931591548105	61.11646266692912	64.21999457665576	69.06760664168854
50.182676427350266	40.65530083892461	46.34076895014001	43.40841276680384	43.29491237386745	54.986669763272	55.672240003554094	60.33497892960778	52.455526072781275	48.565240699117574	49.46485679769088	51.499511663123386	48.29505329794968	50.75469324186047	42.351711142957356	40.73052697882269	43.978556331965194	47.09902530736845	42.78449718980724	46.98421072008148	45.392991215145265	43.394495814095315	45.74534476635783	47.28784914288242	46.32654613458206	43.56710694167333	57.38462861664604	55.940016557949086	54.03791107693466	52.68305670628753	50.80974453742261	51.55030339145494	53.16359880790385	52.69456990762977	54.962010681013616	57.85320557679516	60.849559878930094	61.7159704420094	57.688716230593954	62.194375638971884	49.049699190493826	69.82546817072216	71.7276824634009	71.98746190599307	74.2637445711167	70.74507045509591	67.98407600378968	66.2442605845187	67.72748820454515	74.5768483012968
56.9055254808134	45.916826521364996	52.50746538450042	49.75341206487878	50.221837452972984	61.40383039238419	61.19472019304266	65.05062833898748	57.17878536044426	53.30144091197734	54.378188040785346	56.66633056833596	53.66004768887249	56.478317052191734	48.213073447413116	46.25720887684045	49.23723473790794	51.69770169381549	47.47858723709917	50.96360961565079	49.539410179784014	47.44780022731268	49.08456875426945	50.93613892171146	49.050512315982154	46.555903884503635	61.4817510194717	59.17352910935524	57.57715059521136	56.05801426441401	54.866421919923766	54.8072433461506	56.304314570450046	55.37184858372566	57.683823646215465	60.55008338780883	63.855344873548056	63.83067238369068	59.88884193601313	63.67788904979222	52.12054259864997	73.17096362692742	72.22678005432317	71.9322360521378	75.07386649282579	71.62311269061055	70.20712828627929	69.17148565413095	71.82766205205446	77.2185626169141
58.42534957114665	45.92542871252238	53.3859490531036	50.922392622560366	52.161176523119956	62.43447679115799	61.1255947711219	64.02249743395038	56.303242461923425	52.528681221211286	53.768284623683094	56.28184598812993	53.56424206787293	56.73369265865346	48.83194140600845	46.54976529186626	49.13859733739866	50.8219488189882	46.827077537865705	49.478640837001606	48.26232139631278	46.14353510059886	47.03494930984791	49.12778991025686	46.43158774689414	44.26051791516984	59.87622156510331	56.77653258589017	55.50190790428806	53.85947597311773	53.35775004581426	52.52627647689598	53.88068008951326	52.54558811348912	54.847814566533245	57.63612113917707	61.163628560591086	60.35252340208909	56.55055969574432	59.677696827010855	49.73307189202538	70.66214642193158	67.36353729685533	66.67779105055331	70.41312547390217	67.04801129064606	66.73177559494343	66.32889187062153	70.06703241451605	74.02530728280577
61.43281823910111	47.997232770001226	55.98273025084747	53.78485664978431	55.5702047433965	65.01646508180379	62.846701630160574	64.89604455665227	57.424442396180574	53.807435391018615	55.160275832471164	57.817158071804535	55.3854162361806	58.78420046402858	51.315930763625374	48.831157387659864	51.04744141382522	52.04870133292725	48.336385819253934	50.207837881412686	49.202532358072304	47.11433567867216	47.31738472458029	49.57711218135312	46.19956012637175	44.39365614241188	60.302402887116315	56.53250723534735	55.57725689676855	53.85231071046189	53.98315946525228	52.46935772693437	53.66427102641604	51.974414680888465	54.22331319799998	56.888899561791746	60.57413895844884	59.013715723314	55.408310670366845	57.82237267816416	49.63743422960241	70.12711509246736	64.51511807841922	63.409388943573376	67.75258591748418	64.50888648478735	65.31482154967985	65.52857597907617	70.22253647204202	72.8084278329822
42.16888137465319	37.221326581064126	40.09083048212749	36.93013110393432	35.15048634170513	47.544163795621905	50.39615510033168	56.61699899097182	49.17543504587143	45.54496882931305	45.98301684028131	47.299813050973526	43.873388284414844	45.298653896815004	37.254093230392115	36.6494705376293	40.18815762712433	44.50100355759423	40.39912051961707	45.69333057989159	43.90700842815213	42.30179119507405	45.82946532176736	46.63214541235591	47.50186053484512	44.52463391760344	55.11419611920942	55.454654338682055	53.08396101528522	52.13848598317638	49.049719094198615	51.31189262734535	53.0323345530232	53.45386661859932	55.49130489737497	58.2562272924809	60.52125863442454	62.96080745908055	58.99284651310404	64.50452554648803	49.353915108161324	68.46260221274011	75.2855501486402	76.41681855370567	77.23336453198199	73.71935692351407	68.76223189657469	65.81305955786947	64.96324346224111	74.36212055867672
55.44571698355446	51.825079839604044	54.12945260119769	50.976931577099634	48.618247011218116	60.94951997767495	64.53529954483805	71.04028644817743	63.712654769956494	60.13124205484538	60.517360291771226	61.71547447771838	58.28647428476992	59.463720849288094	51.635483165259245	51.195738643045615	54.73296160574306	59.12395958309496	55.04456895301814	60.345038228062066	58.55957477125171	56.943416131408085	60.41200022658153	61.26702914615	61.969453644885675	59.00001725183086	69.72277182465851	70.09886191002757	67.73609529854232	66.78002056541102	63.69730442620256	65.93762844854102	67.65625419414053	68.00619128495242	70.0738187067442	72.85743108982203	75.16615441438634	77.49401308643621	73.50456103472709	78.88668935682453	63.93328975691091	83.0992423834262	89.45018004334277	90.34988147682117	91.53686500286099	88.0099667761284	83.35705466828803	80.46403963669668	79.48742733354186	89.01288769140915
51.27719166734913	47.32525581326006	49.76990066086496	46.612102257330406	44.38819895686282	56.757689671676296	60.15789454900681	66.59046590135151	59.23140285954117	55.63668674553461	56.03641669339038	57.265470139318644	53.83609017940389	55.07674232038155	47.190290385726804	46.71014944103324	50.248404135956164	54.6195807404537	50.53386921644294	55.83174280713768	54.046195738528404	52.431929246541	55.913689451605656	56.75701454103238	57.498353820383585	54.52643743569704	65.22277415142347	65.58697686844906	63.22275484511705	62.26866865887777	59.18604788617904	61.42973010019358	63.14881023728819	63.51564577459983	65.57618191744231	68.35546121306416	70.65415548457527	73.00894853022461	69.02446422994831	74.4399254951992	59.435988792932534	78.5914837199652	85.06207625136335	86.02337488774265	87.11258931072605	83.58847489833526	78.85700449940168	75.950870751338	75.01135397604607	84.49976231304562
43.141844538170375	36.35287676045546	40.323049864514495	37.20506500480296	36.09118372478149	48.332951056817826	50.37368020335907	56.087888969198524	48.42727290699117	44.66495666601623	45.26839987288376	46.854400367097874	43.466682522123	45.29147580803551	36.99645324472249	36.00235674281125	39.500240398798425	43.46314116492895	39.226503064826396	44.23989918232045	42.49186846120441	40.735443312886936	43.94697286078456	44.989044200338874	45.31536301607157	42.36263799127946	54.08128274823908	53.851100190865345	51.60602530560306	50.522641736993165	47.789428668125346	49.59266294584146	51.297202467300494	51.45355751882818	53.57799491129688	56.403503023485015	58.90876736441091	60.89133794214521	56.87849550814174	62.13871465598975	47.44783899656851	67.22507725499547	72.62861036323231	73.53244267413282	74.7452230841145	71.2153756621862	66.86478324435511	64.26686942739872	64.16477752828203	72.79337000377477
47.07070752995836	40.8902585994387	44.569965943456396	41.42904466839485	40.02042077241074	52.360167608747595	54.723427977854904	60.57911821623002	52.9566356375118	49.21356537342901	49.7887202258309	51.31835366664092	47.91702080356191	49.62981272141358	41.396066649032015	40.49667704668646	44.00858379336851	48.03338824830875	43.809229186281605	48.845429275061214	47.09524554561566	45.34354043817843	48.54768879045085	49.59777122762387	49.88336655666123	46.93663203375312	58.656983787162545	58.459816454826765	56.21348700334742	55.131366654774745	52.384880357685184	54.19960257395475	55.903371267410236	56.04125360090876	58.17304016934682	61.002403582186005	63.517228287133875	65.46688249420379	61.44964188777434	66.6613230958711	52.04560433303197	71.82361816179152	77.06417859858928	77.88162577345666	79.2304314309851	75.69817024522847	71.45764999251209	68.87567253451833	68.71169377998528	77.4019325354481
46.58909546174971	41.810134183403704	44.66437035035325	41.502573606299975	39.60089993023077	52.001957552866834	54.9886551449466	61.22940074773507	53.779823054607796	50.13837516416996	50.588280895669754	51.912304053785505	48.4858295560961	49.89265988644583	41.86530629287251	41.254426506432985	44.7926539161081	49.0773268597258	44.95336497048994	50.20250462901043	48.42217500067321	46.78202365684728	50.2282627311165	51.098757843642204	51.79698825687447	48.825491589340515	59.69683318975138	59.938481770974455	57.59423835673979	56.61689351721171	53.5977139905717	55.76329664777604	57.48091789931674	57.82240691876313	59.889834762613205	62.67531499759251	65.0061311792451	67.31226896910425	63.32553254813689	68.73917659580572	53.74926655691657	73.02347490467895	79.38246870290726	80.38085944601254	81.41738652861505	77.8943246473922	73.17377126989918	70.315845148629	69.56814313205496	78.8632691547647
52.934686606422275	47.98662134307555	51.02926096733866	47.86783291593024	45.95906776678025	58.359835163759975	61.34025433759939	67.50858492525944	60.00248235082551	56.321861229717804	56.81640028200177	58.200869348234406	54.77818996930333	56.2426138860342	48.174692292700385	47.48665294883934	51.02050144808092	55.21201593029623	51.03913201295605	56.18475425683151	54.419410908513655	52.71446195126254	56.006738021780826	56.99700152445212	57.397685426604575	54.4451854475577	65.84116816469738	65.856143092512	63.56851153982237	62.52844197686392	59.658538187792075	61.624698309677555	63.33418992231276	63.53101236850543	65.64739421256068	68.4656552423989	70.91992504418789	72.9735970839127	68.96107629533941	74.1981231143556	59.513405422124414	79.10118402469261	84.59449010261797	85.37816276785934	86.76950898296263	83.23710939194773	78.93625789562523	76.26157955573409	75.78787696032049	84.79905137923693
60.61862206103273	57.09266210121753	59.394770966392116	56.24454749159615	53.82823891644585	66.1328822335377	69.80554756709006	76.32510925563524	68.9927452142345	65.40378361333465	65.79753086206259	67.00031271599784	63.5713192005912	64.7373796636435	56.92023446015059	56.47378791228288	60.011550410110615	64.3854655749151	60.29147310228381	65.56436773563883	63.78264600788694	62.14491610538513	65.56156082278557	66.45932689108182	67.05158181009284	64.08888806051897	74.99010392565832	75.30131665555813	72.95614509054549	71.9791848121249	68.94156267712415	71.1192024856831	72.83560971175994	73.1321012707183	75.21897602950084	78.01565699074662	80.36896144819165	82.60351835770882	78.60298290268328	83.91193749181296	69.07892155053855	88.35388323631253	94.36316035246273	95.15936838181702	96.51453026346033	92.98355888349313	88.50733421737566	85.67895656564538	84.76937243432381	94.22654063487676
60.61288438961341	55.96449484576544	58.91372814178494	55.751780327458924	53.68976696334798	66.07695803493493	69.25476247118314	75.47874593174738	67.98116928824858	64.29982083305471	64.79477018731433	66.16742869949806	62.74307758241923	64.16017902611077	56.13092928593665	55.4644244826385	58.99873689773365	63.1842263499432	59.002521492788134	64.11616471040315	62.35673518834517	60.630004564727805	63.85384516124875	64.89610291293937	65.15228449538061	62.214898420452435	73.81385212465786	73.7579568176952	71.49372776612216	70.42949436123676	67.61331074997577	69.50478304136499	71.20943010708505	71.3352386111566	73.47480741999395	76.30728595221863	78.81769495884497	80.74293599921744	76.71981857447311	81.8449742611947	67.34989823063175	87.05703403828541	92.06157524230836	92.68727530567377	94.33125908327986	90.79662622146233	86.7565749998702	84.17081078451355	83.76674594163084	92.70136433367638
52.46372947204593	45.314895194832715	49.6321709100225	46.52415534798867	45.41035653786345	57.67039884289939	59.61327584892564	65.12445817473923	57.37960050959822	53.56301444430397	54.25335439625651	55.957851608028086	52.59821106560394	54.544786319292534	46.20508410404175	45.072987838612995	48.52992714438578	52.27327963846042	47.9829937078181	52.74195214600908	51.041030650878014	49.17842778116313	52.0553732341249	53.31931404660067	53.0654010123889	50.182824656072114	62.833821108646575	62.14468260616742	60.028877379717166	58.82932759178754	56.415243604339885	57.808246396488315	59.48273658991744	59.354847535727984	61.55796964204714	64.42744830161807	67.16142229578203	68.63393766879932	64.5968103004065	69.48270809805723	55.49270212137004	75.77072236877501	79.45080153634912	79.94865586978112	81.82390564152298	78.29122729480167	74.77295865033273	72.55421726478403	73.03139587623687	81.02203979422136
63.6364245672321	57.91297951233354	61.50772529745784	58.3535913931262	56.633738501290075	69.03185819739002	71.73041261045346	77.62905862496372	69.98679307396878	66.22348879769177	66.82546401878152	68.3707525678424	64.96855254007076	66.63256674958835	58.43606588625883	57.544593093051624	61.051574877727866	65.0066417082464	60.75179633409558	65.65170643680504	63.92831959855985	62.10776903841616	65.07966757531547	66.29137062847859	66.13025414918782	63.24228836428922	75.61384108584178	75.13461343708316	72.97602682588271	71.81316884766245	69.26924192245694	70.81495180756974	72.49744622789551	72.4120333219348	74.60799267670981	77.47321655878098	80.16519844504778	81.70153554970169	77.66452852940655	82.53133578705852	68.53048918303412	88.67577033249384	92.39737882291061	92.77857108208846	94.8243160201055	91.29404571824674	87.83399428673633	85.55167972420608	85.72293147192188	94.03758166196418
64.24624062763507	57.26098488895143	61.58838610273994	58.469503263473094	57.194486399568476	69.51846713705096	71.59972777046994	77.08059179135412	69.31144229770062	65.47838882911964	66.19868866344665	67.93462085705306	64.58086239413822	66.52850661404875	58.19348507581709	57.04693491144969	60.49229154557437	64.15550558681372	59.850954725144824	64.47874322985376	62.80681908900691	60.897722071526175	63.57857550193495	64.96241636214192	64.36402140017793	61.54678662237901	74.67462448786162	73.73466754480329	71.7008844297318	70.43826676811639	68.20495301527274	69.36728618884297	71.01693686347936	70.71076092833893	72.95389489106432	75.83943311751683	78.71066086831779	79.83565778802881	75.80176936715254	80.38910866712138	66.95952622046958	87.48067731378016	89.88386681448206	90.03665141742398	92.45372261552465	88.93780464369026	86.06677135743172	84.11085744873482	84.91596311073863	92.52039847112019
62.93137388325939	54.56184981176069	59.67916017380902	56.63655809507951	55.901563808706044	68.00953625320778	69.35817295027212	74.33266050270745	66.47459421204647	62.59446297452293	63.44024563986251	65.37544445405202	62.1050109673376	64.35832069909085	55.949009351108465	54.52483960730025	57.862297246494826	61.165598917198615	56.84609272217032	61.134935595206365	59.532584522015284	57.544255739624894	59.89137731130122	61.44740758368667	60.39432140590015	57.67118617557362	71.51299923152901	70.08760989378813	68.19724767516504	66.83692099853167	64.95037422378525	65.69609538486162	67.30123116938984	66.76826743032902	69.04750247061438	71.93912164343422	74.98118987750384	75.68297723862152	71.66960046757387	75.96305649245153	63.17487285159717	83.98372247339927	85.08144848840986	85.03013917619177	87.77608062738082	84.28232438454825	81.98888645926228	80.37182706549201	81.84380067271238	88.6726079493475
65.73717147745154	54.81017328045983	61.41037931033528	58.63853586604321	58.99570749994326	70.28857780995708	70.09508859369654	73.8382823516287	65.98253326150879	62.11580943822008	63.21852627187962	65.53702870362602	62.553608543103266	65.3901297581938	57.12637861532027	55.166100112177666	58.12628519184906	60.49184467418032	56.30067961543731	59.62519371912699	58.247469953437445	56.143682679358	57.5751935267321	59.50836901112825	57.32990615923553	54.95177873298922	70.13492894618064	67.56879670797196	66.08267963312645	64.5179803364236	63.53150864951563	63.234726540462994	64.6826671684465	63.582024178666764	65.89551032676003	68.73319658942088	72.14271962327913	71.73598333748323	67.86204191149753	71.26825165433895	60.50113750157676	81.54803952267285	79.17175505718139	78.51212801154803	82.19160138233272	78.8075679851001	78.12419712465491	77.40277637073015	80.45428801972933	85.29452412035744
68.87482758806772	56.36930103225968	63.86562245917547	61.39202946881325	62.54656746868902	72.91349158278118	71.53203661767685	74.2039077621505	66.5550263716386	62.82039437204232	64.09276342443314	66.64481545489002	63.980320469781645	67.18534039408888	59.31024451742252	57.01601854026588	59.56346485200603	61.095348684845455	57.16791453128359	59.578501729634304	58.437265337054946	56.32342118392278	56.934848034063464	59.11022185256311	56.06230524686894	54.078438195315236	69.87231064102339	66.42679876775372	65.32201147516207	63.63316681867575	63.42555111034633	62.27041919203606	63.5403759686652	61.99033614257584	64.26367934100105	66.97713412843093	70.61341465315913	69.26899079520655	65.61173584377043	68.16085660339246	59.44912299209694	80.1596377131627	74.84042184970488	73.65055381306513	78.09854939329693	74.86586698230141	75.59269483139657	75.64724753093003	79.95178738972918	83.04992628993928
66.59890202763171	62.72772378418918	65.27749458777143	62.1219599853241	59.785249482349506	72.10800605231832	75.67362840277275	82.09456884130444	74.68969835512767	71.05609007916814	71.49667393264916	72.77067524727448	69.341530486272	70.59507686543633	62.70075986993769	62.16368367094701	65.70255747497772	69.98908561880957	65.84635508165584	71.03158873531524	69.26216913677351	67.56944431953164	70.86028934119125	71.85550605867313	72.20911032003671	69.26498589726532	80.61172333290794	80.71393659105755	78.41823858658545	77.38647777043656	74.47986437368483	76.48392217045118	78.19313897963544	78.36945693640652	80.49540832738352	83.31841624719259	85.77824732746126	87.79519407508897	83.7762647377168	88.93509931269799	74.36406449601398	93.9168852334168	99.16952382666062	99.7884980240886	101.43446674403573	97.8999023065482	93.78242778751545	91.11720089997154	90.47679906678893	99.65621585001377
75.74431588110741	71.34643632891024	74.25656071875328	71.09588674712862	68.89024398370587	81.24155423316587	84.6205191454455	90.88028856411273	83.37462158011108	79.68140272857306	80.18995006665236	81.56849545812946	78.14375059961161	79.5297721202964	71.52841556922256	70.86149925084477	74.39450564948424	78.54593918638854	74.34371505311152	79.39059302761414	77.6435260081157	75.87835543739493	78.98167076195256	80.11125042777746	80.12737377243991	77.2210104820961	89.17514137509126	88.97011949730532	86.75153110603458	85.6429890445692	82.932463368771	84.68163006794069	86.37591527585855	86.37944058281319	88.55524826169136	91.40883864548023	94.01850170966335	95.71284978564417	91.67821102084228	96.60497239786363	82.45461630914706	102.37270006053181	106.49394493995547	106.85175419571439	108.91968024624285	105.38893393828405	101.80851549254425	99.39008372489788	99.1577391286763	107.90241062198126
85.46095291046841	79.51334251068897	83.35618624573897	80.20453414056973	78.47366731131213	90.8743262766529	93.54763718903739	99.30048708596603	91.5857977235948	87.77837894133714	88.4486560450317	90.0864010536103	86.70091734714062	88.45284441194634	80.21300764793847	79.22233342849246	82.70394546481722	86.49247622132081	82.19980752077322	86.88833444376186	85.20847551368779	83.3101512050238	85.99269837636282	87.38302807910102	86.72706120564624	83.93109336822481	97.04438265291017	96.15375787838943	94.12051964638009	92.8586437487195	90.59943216751358	91.7842254556268	93.43057161970395	93.08495488921272	95.33785407827472	98.22602711788682	101.1247779436485	102.14509129723143	98.11742589041341	102.55213560422409	89.36335279904509	109.89766954288918	111.71540116022426	111.6059148742299	114.41564119542733	110.92055280580462	108.40755923821379	106.52510397586963	107.25087970538469	114.92228579752606
84.01975474612455	76.97944693675662	81.44064961026164	78.32076596164531	76.97577161020881	89.32757234998574	91.43622524950626	96.80175762495303	88.99237561818427	85.13585108979933	85.90675343222273	87.70747588629027	84.37175130431076	86.3705081486745	78.02207308645326	76.81859234294926	80.23734457132792	83.76317733503205	79.44609697652581	83.8818169752369	82.25402882279069	80.2907780402284	82.71205765510068	84.24082658488012	83.21694556801174	80.49997526509412	94.20095651151917	92.90718710837591	90.9922236613766	89.64921493761469	87.66974321044748	88.51704158169932	90.12659442847098	89.59138601251388	91.87309032682163	94.76456511179549	97.80858793824956	98.46012014460354	94.4557364126972	98.62127061284102	86.00320042299673	106.7838983586691	107.40888844826253	107.09697411273625	110.2241211167082	106.75789435651694	104.78228971096782	103.20010533863115	104.4989703847889	111.49918959628913
65.75020401247625	60.95260014993304	64.02950023314835	60.867495180919974	58.82740591836917	71.2148571499221	74.35825757589419	80.52565170589742	72.99117242260164	69.28649217690494	69.80953573259474	71.22229364060208	67.80107538559022	69.26183103400547	61.20147308408035	60.48591046258898	64.01580696917802	68.14164674135095	63.93508169633745	68.98185805464004	67.23369297690222	65.47258498161082	68.60203610645337	69.71142307386944	69.79514885120803	66.87745577467359	78.77017991291243	78.57168401310093	76.34509357680359	75.24400284062307	72.52184580797054	74.2905170353535	75.98750032710367	76.02602703046577	78.19097507828319	81.03873802268355	83.6228749944088	85.38662318863267	81.35512835614357	86.35963508104766	72.08203953301205	91.96199867536856	96.39526050638439	96.87964270170875	98.75153301187419	95.21787568247358	91.45541823094919	88.99094799783698	88.76995006908886	97.50770089868686
68.9360947424566	64.43978799937165	67.36557792696122	64.20421644522362	62.053562742707996	74.42148980897313	77.7209064409448	83.96627499271918	76.4636960813469	72.77505037153752	73.27833775758367	74.65469203465344	71.2301087179183	72.62849849175473	64.61603339165397	63.94911817232239	67.48263635428259	71.64727670043602	67.4527977112248	72.52602697513264	70.77395372300458	69.02350974783455	72.1744206467225	73.26999022971025	73.38044190713973	70.46088958579078	82.27696345624844	82.1312522415105	79.89427029900529	78.80316937850131	76.05065830497603	77.85618514201104	79.55485376231931	79.6069891621591	81.76884838993327	84.61454956550396	87.18477327701424	88.9724142108711	84.94141567846361	89.949698161069	75.65725250338247	95.49326417570677	99.97604013983467	100.44418627889836	102.33851594874986	98.804997890261	95.03604731582939	92.54946091686806	92.24787324567106	101.06993552245844
70.42548515656321	66.45105591671532	69.08648821378709	65.92975805001967	63.61047226952917	75.93457607498563	79.47759148996703	85.8645322634772	78.43351884992889	74.78335571053978	75.24207815750285	76.54233465080095	73.11373135593423	74.39630554483588	66.47787528749893	65.90822222240638	69.4464051641819	73.69718935588098	69.5362577663523	74.68224738684431	72.91895112290696	71.2035850720245	74.43702041225474	75.47489407474299	75.72054391535596	72.78733188264462	84.32402364171477	84.33637058750577	82.06342988871425	81.00800122939528	78.15931108835558	80.08693458747418	81.7920738340402	81.91355415250733	84.05630463919093	86.88999116761563	89.39720014990355	91.31282513563124	87.28735955765204	92.37136352821565	77.93243339310786	97.6013474146134	102.49234287253283	103.0207871116795	104.81300074411092	101.2785173206052	97.33667321206451	94.74735757828677	94.22188821889203	103.28006247732722
71.90151298819701	66.52669994998757	69.9762570611901	66.81705752055275	64.93977824426776	77.33923636747251	80.24446042772882	86.2220686048989	78.59788763929842	74.84171309871422	75.43277151655589	76.95137755162573	73.54340964255772	75.14519276012591	66.98985224018378	66.14167070405169	69.65407177875295	73.63122256015168	69.37851673210183	74.27480059446101	72.55343929955113	70.72795472784831	73.66951700149859	74.9030316646218	74.66968239724197	71.79579665770284	84.24024626044044	83.7412957634976	81.59399735093888	80.42172115261484	77.89638929640432	79.41454954175408	81.09316996260311	80.96915295277387	83.17557808061309	86.0457456957718	88.76660527238063	90.2237835858155	86.18590833075058	90.96814227796344	77.11065558356763	97.30046041752826	100.67786705802993	100.93208831379579	103.17379739425489	99.64868097754312	96.3824916639179	94.15600790755164	94.34154852287975	102.63360358542396
69.31599304181108	61.50037159809846	66.33767250093211	63.2576224304047	62.264037550067826	74.49684723361521	76.15992887318681	81.30307419257312	73.46379545822002	69.59290843363885	70.40546331195834	72.28267637147994	68.98189067228	71.12816165071067	62.73622996869428	61.407738380509976	64.78388182180728	68.18925896955686	63.86949812099954	68.23033924410467	66.61495404474567	64.63906609252027	67.02913900911216	68.56779380905425	67.5447389792043	64.81959489964618	78.58087340954657	77.22461983273912	75.31879493000632	73.96888629197936	72.03246269133494	72.83410406598172	74.44297126583918	73.9186489872951	76.19757006618211	79.089208237132	82.12508532594632	82.82639966470236	78.81488266126827	83.07446924697042	70.32010819520386	91.10866236356955	92.09178453262557	91.95548490764867	94.82535376740293	91.33944822569717	89.13586320974966	87.51692803351408	88.8979142606213	95.82235702592234
72.85212209671347	66.58835211100151	70.55400505214674	67.41024647426802	65.83157729018367	78.21977948252587	80.69595715760057	86.38261576210915	78.65911491952497	74.84906997839583	75.52488476084454	77.18085263192602	73.80170294047183	75.6059623391477	67.33621743950373	66.30972618569939	69.7854621904165	73.56193624781568	69.26977072515321	73.97606499179172	72.29068112790826	70.40107142317264	73.13387995553786	74.49211389666398	73.94023675673982	71.11937162689058	84.11600761758443	83.2797241649672	81.22370669347073	79.97824152478287	77.67774676403326	78.91772123450708	80.57221614523675	80.28512787270445	82.52595500451808	85.4105987889881	88.26477485838097	89.41266283358831	85.37899028013628	89.94553053347512	76.52367316491944	96.99307777353565	99.35706373131906	99.42819349157426	101.96420409162492	98.45305712132846	95.64412254781502	93.66446841927063	94.3203213855706	102.08428443924718
77.86395126064389	72.85061742887412	76.12495104242046	72.96326827725169	70.94643878309323	83.33238554506902	86.43421413189705	92.50755654683175	84.9146030800037	81.17355193639887	81.74323692130558	83.22146898960858	79.80694083702224	81.33585333857272	73.23030036953294	72.43809089754993	75.95782958616093	79.98054586542023	75.73768253433771	80.66259092343329	78.93684457349984	77.12019961723848	80.07879909290581	81.30321854973117	81.08226276897382	78.2087381805135	90.59649017310025	90.14457132088161	87.98879713959799	86.82392643030056	84.27149485093955	85.82095644951852	87.50093034623373	87.38207801132057	89.58812749162414	92.45793055750995	95.17239561582798	96.63478807244395	92.59689069625439	97.36337203497008	83.52184469444582	103.68454881883859	107.0243708739651	107.23088790438545	109.54313214318418	106.02005082356183	102.79532058264091	100.56054780275745	100.67212116071795	109.04146254862692
79.9200230402266	74.28001607783123	77.92342538217017	74.76701124110893	72.94935712794067	85.35009049405518	88.1584922292252	94.02893597525826	86.35685648397926	82.57292665475822	83.2048713286447	84.7838436062549	81.38599586860597	83.06034404292636	74.86266299279096	73.94307777252122	77.44126564924073	81.32267821827816	77.04676820029205	81.83517618055454	80.13503174699392	78.26916131442981	81.07181001729784	82.39174287069932	81.92611082845146	79.09283623115948	91.906411826168	91.19888859961736	89.1118495973692	87.89060364307998	85.50654928450987	86.84632267109853	88.50846544944069	88.26303546737	90.49656872917377	93.37847977500373	96.1976037003491	97.417019450466	93.38196042084871	97.97485712556555	84.47691216802842	104.86289821353931	107.38628748313032	107.43567596832817	109.99854528839056	106.48768737934017	103.63646302356288	101.59555338749719	102.06528950400237	110.03360881698582
74.54096193278211	67.58368267187087	71.95608487476905	68.8341929563452	67.49475951749115	79.84140985411169	81.97078084245943	87.40716296232556	79.61842474554543	75.77343836773902	76.51795074170592	78.28301287136752	74.93644286505337	76.90044843899291	68.56233002948525	67.39384130969864	70.8277832240822	74.42578366454369	70.11371188426864	74.64441880158972	72.9947301471105	71.05631995999552	73.60054427311266	75.06273492279593	74.23468957550129	71.46921076672585	84.9070573275911	83.78409727669833	81.81163724609891	80.5061073655824	78.40415780749673	79.40205563366843	81.03145994366402	80.60245305315387	82.86812832622596	85.75898425752293	88.72355428453312	89.59745317943386	85.57586162854389	89.93996668317654	76.93586092716832	97.60382543360448	99.0633242264704	98.96451078453246	101.76854715458153	98.27553579263521	95.88193246723807	94.12196634708245	95.1785034150772	102.47780741408957
79.39187080372825	72.5657355963079	76.88574343313789	73.75836160945254	72.35237962911398	84.71548853120262	86.9256660063981	92.38886681205798	84.60263753288251	80.75845975984483	81.50069597154202	83.25855836875735	79.90854510381335	81.85142440499806	73.52239434987943	72.36979261032295	75.80730759710265	79.4113755453868	75.09925090188922	79.62271761132882	77.97554169923394	76.03405056083568	78.55711830404438	80.03213298619427	79.16104306419355	76.40724003224511	89.89119591637537	88.7439788503571	86.7819162266202	85.46961174229412	83.38581390075468	84.35993116290723	85.98535212008184	85.53147772441329	87.80144898791458	90.6928042552461	93.67597474906034	94.4938741286967	90.47650824402868	94.78188471664653	81.8832147209969	102.5748234052953	103.79402134269118	103.61759634410426	106.53825699718205	103.05366397449964	100.7896580854445	99.07332819948311	100.16392632114346	107.41699040478393
79.22639671470857	70.27024236832888	75.80434017121902	72.80106192615018	72.20955113623096	84.25195600932922	85.28623764810226	89.8828385178965	81.99245121640705	78.09752899223865	79.04173665544594	81.11621529385795	77.9198600422892	80.34461255966846	71.93289388741617	70.3545824374823	73.5967884332228	76.58558767263217	72.28862215661893	76.19860354828343	74.6874010429823	72.6341040448226	74.55017653443178	76.30823155310351	74.63987452517752	72.09682043429869	86.68974037658927	84.6927513573996	83.00657463222166	81.53369114918566	80.07729041872567	80.31119273806226	81.83865424376178	80.97547686888792	83.28573248345458	86.15696307855534	89.42771615205133	89.43853015948027	85.50487194212647	89.18368399784514	77.66015034119097	98.68491260996207	97.31072753287533	96.68269872400185	100.29664985587384	96.893078938428	95.81852665763356	94.76122410936856	97.05384470115963	102.83650988869535
92.6249645200028	84.26823853143765	89.50521843892082	86.4540258006341	85.57605933803455	97.77312592670718	99.16646519599871	103.95773359806851	96.0741561910504	92.1815489386401	93.091195080883	95.10595927710571	91.86892550591247	94.17945459297015	85.76754730663431	84.29089877069359	87.58501908399144	90.69411559678126	86.38701798798648	90.38465362178759	88.8566236980983	86.81325348832479	88.77904865898144	90.52097377129994	88.88008544286838	86.33512467233089	100.86246790368847	98.92768629900877	97.22749012357322	95.76272204925033	94.2553135372631	94.54455163805945	96.07564260981367	95.21461349382655	97.525136747503	100.39560074969678	103.66767486156601	103.65000070231925	99.72505753109021	103.33368073499325	91.89796498615898	112.91792454805822	111.26031714430289	110.49118659113837	114.3045412043123	110.92585207497403	110.03276691824753	109.00151859309229	111.224922834532	117.07038870501012
93.99888912238133	83.862401062605	90.10319777821339	87.2138355328503	87.07019136654199	98.81332716003236	99.10848977112067	103.01658271798767	95.1540452117634	91.28141169556653	92.36413767365421	94.64080351451396	91.60016611508466	94.31697314063658	85.97265394163941	84.13986826443409	87.1898259119442	89.66691031835562	85.46093902039804	88.7966280225441	87.42962773964223	85.32427503648717	86.66442398182511	88.6424523657601	86.26020911782936	83.98207668005017	99.2998104598976	96.5683883065533	95.1691571557973	93.57441513515583	92.70271479709146	92.26909586669052	93.67448967582759	92.42457920526203	94.73057402259559	97.52846370406243	101.03264662988904	100.20014257053316	96.43017265585655	99.32880594031765	89.50507686588105	110.50500085440608	106.18423249764398	104.93366850265907	109.44355032173227	106.20208316258127	106.56740280733655	106.22039044036269	109.60352205299006	113.90730798732866
94.36019919187176	83.80950985826684	90.28168479457449	87.44396570044684	87.48605667009721	99.07558740073398	99.09125378264459	102.76293745593317	94.92859680120262	91.07386171768407	92.19723955693273	94.53339222625452	91.55300507040629	94.36422417495012	86.0669402677576	84.15088432709133	87.1263907961631	89.4324302899921	85.2682722958774	88.42096006913764	87.10050954962018	84.98727149759767	86.16044777015225	88.19232309204745	85.62648939190048	83.42657944059071	98.89697288775685	95.96804260189332	94.65082390352053	93.02747785821722	92.32269034478719	91.70381195416748	93.07214239654762	91.72530861510803	94.02294861099699	96.79379667176272	100.34846501383619	99.30689867030179	95.58752042725712	98.29334009678378	88.91866696640135	109.85514532715148	104.85345421030905	103.4797663018256	108.16218756006556	104.96309598988579	105.6545745311153	105.48540412638798	109.15917606082864	113.05687754400576
100.5830990819141	88.4178793262975	95.78405123795366	93.21734111706996	94.04583753180549	104.80796880015176	103.59562129144385	106.14209784967711	98.55624952378415	94.84907411439387	96.1373196740937	98.70310238785761	96.04232595120547	99.22647727621762	91.27799151787556	89.03447048373869	91.62275643484584	93.11481992571828	89.22130218937554	91.47304626466507	90.39387250855364	88.28744715200176	88.65792922587052	90.90161931030923	87.51829490669387	85.7397393169459	101.6402153065534	97.82263815315983	96.919191562649	95.18851028422048	95.2818887478686	93.80159718528469	94.96775398373498	93.1782924763447	95.39329395509733	97.98433826308484	101.7272768664031	99.67329059026058	96.26773493347504	97.959986689288	90.96898091221613	111.26587272865906	102.88587296422449	100.87386322898045	106.40940608478203	103.47707982691125	105.82708029209458	106.54045049170028	111.56246207991104	113.44288168659348
89.11486595479883	81.51888842744387	86.3142187659629	83.21870897211903	82.06144283238656	94.3641733313208	96.1823578706521	101.3105530014339	93.46010162762006	89.58274845733929	90.4146538322308	92.309377821765	89.01136354625628	91.143889140095	82.75796103079867	81.43661565333854	84.80729134316815	88.15819689244177	83.83861659627553	88.08895424702077	86.50260711293524	84.50053792116569	86.72277216658067	88.34960263422825	87.04605148906505	84.401941753997	98.49257689378832	96.91326415537057	95.09142661517424	93.69214562889785	91.9192364775829	92.519733427992	94.09655272977268	93.41343199584789	95.71177092641648	98.59800984082136	101.7489655376203	102.09814273419691	98.12425147362036	102.03992589679794	89.94211599767192	110.85742340013746	110.43819238578058	109.90981996581519	113.36443438926702	109.93471792728728	108.45622466329851	107.12126623742965	108.83011275786357	115.32597644606896
84.66768747678394	76.69526096615603	81.6897214052781	78.61548650842877	77.61426262188297	89.85965112690631	91.46333156791323	96.45665834355266	88.5914274928517	84.70707488466576	85.56751090512087	87.50935317517043	84.23484913386042	86.44633096711712	78.04472899212227	76.65513130990547	79.99645326197115	83.26014519874282	78.94281815509574	83.11591622093003	81.54591590584693	79.53082342194533	81.68680902587651	83.34277892168723	81.96277017115298	79.33760990258595	93.54527081786267	91.87114048858761	90.07802475643348	88.66213323334013	86.95945717686709	87.47857088599716	89.04558655767592	88.32597981639876	90.62727361323948	93.51133433619721	96.68719757217876	96.97195980710218	93.00434835196401	96.88316410632567	84.88467196879897	105.82988374476436	105.25579864393663	104.7281281300587	108.18535919419926	104.75755161803754	103.33483376598068	102.0528674351522	103.89357483758582	110.23326767739512
90.14744812729414	81.15902869384259	86.74601657562138	83.74286145114185	83.12391397090101	95.18778401183113	96.2072102551041	100.72214242292344	92.82981481456001	88.93486340926026	89.90134463434914	92.00464835993485	88.82413948394961	91.27475904235735	82.86444543202423	81.2650030275538	84.48832526447076	87.40414574457681	83.11781208797785	86.92237470565547	85.43926065663857	83.37200867770724	85.15789554073301	86.97270959995222	85.11593470919051	82.63981928910988	97.42972361697733	95.25762065065713	93.64087621782248	92.1355532471288	90.8123828811428	90.88987725236882	92.38822279840508	91.41677420592993	93.73044944656282	96.5861049213426	99.92803839244316	99.6894383295491	95.79899881497533	99.23048196716725	88.20426275805781	109.25509687308369	106.91227599122956	106.03648925410737	110.00902444085831	106.65851988166659	106.07739178066525	105.22948815518417	107.79183968353469	113.20465085373067
96.52946599180575	87.26975551753445	93.02533304296028	90.04457078934146	89.51817316323977	101.5299336829836	102.38488637884701	106.73506216369732	98.8445845459572	94.9523320754857	95.95388474871076	98.10820738046414	94.9626924443145	97.48385275729011	89.0819818822868	87.42181604333697	90.60232037895992	93.39478903254808	89.12764427245202	92.78948194169172	91.34238814296845	89.26017773854602	90.8971089152299	92.77111910186103	90.72280189158117	88.31651626174097	103.30675092141772	100.93867621667178	99.39800092914572	97.85935240294549	96.68927076441501	96.59082235747547	98.05711170672676	96.97996148161454	99.29343336853383	102.12999487124212	105.53748051118399	105.06353286491006	101.21830817282019	104.42794333725946	93.8734013906875	114.92702480737304	111.73313500466372	110.66816829550403	114.9116978336247	111.61014345037897	111.44923403101839	110.80070847180804	113.6585478076627	118.66946902807486
96.23686484727907	86.37112060701926	92.46548999053971	89.54501126413113	89.27609455599233	101.11484203545265	101.58607729875443	105.62689300999473	97.75290142893631	93.87266273866106	94.9322020436027	97.17379167107262	94.10002757612557	96.75848518692536	88.39121741363957	86.61060372389518	89.70221129075351	92.27383668193957	88.04773673508285	91.47824949207649	90.08813597513313	87.98816275768394	89.41042154466253	91.36134553239066	89.06618814546074	86.7537483031001	101.9899527087481	99.35473034141808	97.9178294072947	96.33731434110587	95.38443979234823	95.04113949834118	96.46294581043223	95.25649966198418	97.56518127537333	100.3735813828552	103.85481149079365	103.10847076065751	99.31991957258455	102.28929746963394	92.28813920676482	113.30895530499905	109.23367442735037	108.01339026385287	112.47910581010083	109.22606020395874	109.48152915287878	109.0628409216592	112.31044213311701	116.79536927501675
95.52802259704966	85.82536786856153	91.82700379507845	88.8893763040518	88.55223635347056	100.439490778974	101.01600504134676	105.14679687270609	97.26621813185369	93.38148209353797	94.4243543718305	96.64127396194075	93.5462272977188	96.166701501599	87.78754643713157	86.04009283993851	89.15788063998357	91.79437911697632	87.55499932066715	91.05551508253248	89.64779948718362	87.55257088586711	89.04103578901392	90.96869124800692	88.75027890323983	86.40741320741138	101.57146014224327	99.01832829234918	97.5485977443464	95.9807628421227	94.96078273646874	94.69293732161705	96.12910461067766	94.96364078787734	97.27440846603616	100.09253055034024	103.55074402012106	102.89327195584794	99.08510964305216	102.13608541007636	91.95044385471161	112.98606029861604	109.20933468711468	108.04630263668227	112.43102268468519	109.16006525663823	109.27173121694823	108.77750833529447	111.90348777283086	116.55572468211504
91.9438597897582	82.18124920663888	88.20828487069709	85.27771453740968	84.9771214452755	96.83729133830845	97.37667252796088	101.4975422423842	93.61704199419064	89.7324074370587	90.7760965120218	92.9954316608964	89.90357113062595	92.53259579473543	84.15666413496602	82.40059288239351	85.51359428605065	88.14511568168231	83.90595217591017	87.40971874551533	86.0001826063255	83.90541207800891	85.40494128618755	87.32758323720233	85.1298614667191	82.7774762908607	97.92604195782013	95.3907429415623	93.91225232467163	92.34761668800363	91.31481346660999	91.06209821710954	92.50242258243087	91.35135338487953	93.6627992337663	96.48467404141935	99.9337503987029	99.31657856063508	95.49850113684059	98.59657151680838	88.32277773923514	109.36219028676383	105.76885498279282	104.6601549782579	108.96942189384131	105.68399062166172	105.69747647958532	105.16744338676418	108.259550594063	112.96556118500068
95.73680268249365	85.36513179571566	91.74052672035006	88.87935550285103	88.83576073822019	100.49844979713295	100.63488445036047	104.40034011623939	96.55421325590783	92.69201262463484	93.79983171327056	96.11288898623701	93.10772594941095	95.88028190637932	87.56155894241046	85.68027396714085	88.68694142160413	91.06060225818717	86.87965053949483	90.10121945920214	88.76363025614992	86.65289453503257	87.88526713403554	89.89892353872715	87.39416068959929	85.16827538989679	100.58852283280743	97.72646462011241	96.38184327568494	94.76787798395378	94.00514861230127	93.45011967095274	94.83081835706606	93.51461976971751	95.81516262342171	98.59466511255059	102.13418237551862	101.15435236673342	97.4202196461725	100.17868059329112	90.6715141785204	111.63107153670059	106.80680904314796	105.45623571755725	110.10562195387621	106.89723126513529	107.50809554923525	107.28735018841391	110.86656245073675	114.89356215271472
95.52945163167712	84.8012380962579	91.37413874675853	88.56022909615349	88.68092291921184	100.20089435882272	100.09214914931616	103.65100480665794	95.83353422806377	91.9891936350776	93.13135261726819	95.49441763856744	92.54337898902193	95.39644763827324	87.12418876149721	85.17166092645732	88.1114461190834	90.33570032213326	86.19376454828041	89.25597957577273	87.95915822037632	85.8432684101491	86.93245747282513	88.99036132215207	86.33204320883462	84.1739692538333	99.71341262827	96.68538374222467	95.41098835634821	93.77381576246094	93.15351959819193	92.44140220603086	93.78987207169929	92.39294366444179	94.6849656485528	97.44006775795307	101.01990932633527	99.86596636634268	96.17611566531437	98.77326090011192	89.64686491528133	110.54087145075846	105.15718992375731	103.70844127206917	108.49436388321443	105.3218381737312	106.20008063550242	106.12771489814745	109.95080001996243	113.63395734423801
87.87189944274515	77.6740508108262	83.93507268344212	81.05462232575091	80.95856596976924	92.66204763286244	92.9212510766446	96.83782101666779	88.97288270633886	85.09886458105444	86.1785355019816	88.45272532766994	85.4119658933529	88.13335716285026	79.79287325009373	77.95344695440592	81.00142326921602	83.48707812677752	79.27754092808823	82.63832668603432	81.26301629588896	79.15935116036529	80.53754383260134	82.50075936644251	80.17602131267154	77.87163243156283	93.14536083971083	90.46889375567082	89.04420596519708	87.45838170737282	86.54462318549278	86.15918984091685	87.57651682031097	86.36367924261442	88.67226661572181	91.480596863021	94.96274609151541	94.22825042819699	90.43346129585908	93.44152482419464	83.40296149594745	104.4195461042915	100.51519582842138	99.37876293236565	103.73057048871415	100.456815121704	100.60349607339514	100.16982006466563	103.4567833418011	107.90798801077534
89.61359038103701	78.82385830673142	85.41908738262109	82.61552547021726	82.78418585539424	94.25948368089726	94.11532394136843	97.68151261014435	89.86063306462397	86.01459850961942	87.15458575499345	89.51617280441302	86.56581224468991	89.42409711607937	81.1579130532912	79.19764006486959	82.13361063006653	84.36296170404195	80.21777093029249	83.30087235489582	81.99657228519364	79.8813649676956	81.00358264881375	83.0495749865159	80.44074688295854	78.25773671957604	93.76550285258274	90.78715604890246	89.48847628154809	87.85861682291211	87.20002621602012	86.53103600629058	87.89129072044048	86.52766633720873	88.82384204381657	91.59078753459886	95.1522045868367	94.09085563166005	90.37415952554491	93.07819560133744	83.74181280087846	104.66352515845783	99.6808724995746	98.34195717875708	102.97878235933779	99.77129410688133	100.43787320467678	100.28170426975922	104.01360004965548	107.84248503100204
86.81892875512321	75.41602379321957	82.34513069997922	79.63787446872182	80.11347919695481	91.28453125931858	90.70397662394178	93.91292803639736	86.15380793610315	82.34611824030611	83.54205055810843	85.98406716648691	83.13484005275369	86.12741298533311	77.96915649477607	75.88715077429244	78.69521605352614	80.66074854018174	76.59251622931463	79.399689143021	78.16577641609273	76.0467156292608	76.93152936935407	79.04529072869178	76.1964551810171	74.12411376594342	89.7977106830191	86.56163718280033	85.37420506405705	83.71008387857744	83.28097728494676	82.36136553676882	83.66956000471318	82.18393562974302	84.4647661663359	87.19252813467651	90.81080844454152	89.49695371649592	85.8459187577505	88.32359323862357	79.55118574268879	100.34999487866298	94.61719122536554	93.16681084953505	97.96036458254821	94.79655892589837	95.81302073019071	95.86880712810324	99.96811594288654	103.28154117192432
84.99019420600368	72.66972501489938	80.09797703896696	77.57108081503891	78.53689588423826	89.13453220219037	87.8368814222246	90.41607979511653	82.80948583496055	79.09439726750192	80.3788307658751	82.94230681115623	80.28547527983602	83.48273251240846	75.5689733402078	73.30168518354787	75.86806285014121	77.36250647900707	73.46104269608915	75.75864765737192	74.6596821013	72.5506676953258	72.99905189180535	75.22096947960084	71.94952800038017	70.099649107177	85.97173530634728	82.28501342542347	81.30873188029473	79.59170649763745	79.5810671943201	78.2122960571012	79.41626485565463	77.71077775423157	79.94978146138766	82.58921993398154	86.29720859601062	84.50698213132051	81.00015013160044	83.0199443577507	75.38134839831547	95.84830458676244	88.6495037963545	86.9567451995456	92.08107242830356	89.0181340661257	90.73811250560472	91.1992533529271	95.95465743411208	98.304954260317
84.99214844273376	72.02813476940783	79.80178099756677	77.43723760574834	78.78027058292814	88.85795588546085	86.98936990533666	89.03161496209468	81.59658030440949	77.9838168800551	79.33329068295372	81.9806653115157	79.50016536991782	82.84317411177986	75.18441872943826	72.78599579958237	75.13367780561411	76.22532940897116	72.49399406404675	74.34277336032017	73.36728996906737	71.28380373047038	71.35286549357541	73.65154859267035	70.03532051211708	68.39683732754796	84.33157926511967	80.27470793694219	79.48899076557814	77.73656214751821	78.08784312175148	76.3392470095402	77.44387336078361	75.55433474152954	77.74209675180627	80.2874107803774	84.05573217152755	81.84566336010188	78.48847036523996	80.07633413542212	73.50952229635136	93.57407750097232	85.05109363870552	83.12580481481018	88.55664894628288	85.60096516124135	87.97124039234919	88.79591786141603	94.10465903878821	95.59837842280594
91.53563129509524	80.20133823369534	87.10165193055111	84.38120268081218	84.8057441177547	96.0299325928139	95.49073309511223	98.70213008974255	90.94512749648538	87.13807036719997	88.33410625960039	90.77502700148567	87.92203473228315	90.90656161454194	82.73760393129149	80.66606432393166	83.48242081725336	85.45230262738353	81.38457871062425	84.18263359240402	82.95314964256133	80.83407502916836	81.6981468669919	83.81926365119509	80.93648196504445	78.88305929342302	94.57386308970301	91.30248770382096	90.13352695702203	88.4646220642727	88.06214035819409	87.1128425294555	88.41177621163902	86.90136338611443	89.17789941501407	91.89511273520256	95.5264073189139	94.13869212251765	90.51134174286186	92.89998665258584	84.29985594909336	105.06987960422173	99.00556020791682	97.46207601716193	102.38038981436829	99.24790896369406	100.44113181053804	100.56518581122421	104.73449089930702	107.93067662795515
94.35048081421125	83.31504792653173	90.0556803473901	87.28683586982038	87.55652496150722	98.93650496246457	98.61112226607256	101.99068813829655	94.20277902291149	90.37663524475101	91.54718968223142	93.95131496180666	91.04951852597972	93.97050689537613	85.7467752916975	83.73344177174242	86.61188500471158	88.70572905074536	84.60079682386528	87.52554610676026	86.26396958580874	84.14562905202934	85.11488478527058	87.20755398835934	84.42603741400234	82.3247622160744	97.95056714618845	94.7890175016633	93.57233280361073	91.91738286930467	91.41469759469153	90.57399943044219	91.8954904623204	90.43490176518732	92.71869563330523	95.45287867247792	99.06255874286208	97.77364015385707	94.11979382230103	96.5931519897912	87.76857573430948	108.59784782068546	102.79899006367661	101.28387408853139	106.16177900348963	103.01555479110418	104.08985959785365	104.13201049583967	108.14866827551515	111.55760017828466
98.73813448713454	87.72665373533918	94.46163614582619	91.68797801893064	91.93323183765435	103.33708378889676	103.02270116557968	106.38556842629579	98.6025564307188	94.77897704381068	95.95261978502909	98.36011460547124	95.46082350286872	98.38228532576635	90.15677282327086	88.14532876771355	91.02306722145133	93.10592513851381	89.00564626421017	91.90800277485168	90.65377577442031	88.53516418183897	89.47489444639403	91.57721339375144	88.75544581663247	86.6751783538706	102.32430462652447	99.12042368354685	97.92453672055291	96.26384206369971	95.79487726728463	94.91681564649953	96.2281126881193	94.7410233737141	97.02057787756294	99.74418867671542	103.36746602211298	102.00524858641707	98.37417658431889	100.76331327065873	92.10791176068423	112.90785799914606	106.7982390167263	105.20129633371468	110.1886248756238	107.07111000436949	108.30845987595872	108.4175445977587	112.51068010476628	115.79655010798437
97.9928682098883	86.45365573001737	93.47697362799197	90.78960482954035	91.29659588197902	102.43251732237603	101.7265239510563	104.7488632383595	97.03632883096031	93.2550473741309	94.47925626618412	96.95815447262542	94.15579952628168	97.19561836479791	89.07559215702852	86.95885437086388	89.71747276498321	91.55307994487498	87.53198860014051	90.16743110973489	88.9834975272479	86.86559559345285	87.57219449904893	89.73668329598749	86.68082380800115	84.71819506458053	100.49903949029557	97.04057504111712	95.9608665383006	94.26891549434959	94.02926764501503	92.90334272773143	94.15841451308759	92.54770230106254	94.80558935624524	97.48119041909985	101.15745553133712	99.5221014201206	95.97293138670135	98.09778559283467	90.07961082713986	110.71005496740523	103.7298185736564	101.98225723649108	107.17257992903713	104.1190650545771	105.77646196629568	106.12096012842542	110.59159416592165	113.32295996186075
97.45054075497936	85.35751882373957	92.68092035489319	90.09992317480052	90.89799283797197	101.69881644077674	100.5539572302483	103.18210618896829	95.5707337406279	91.84934073385784	93.12718990646692	95.67953657218087	92.99587402394776	96.15995403949475	88.1864616011733	85.95880122323746	88.57208962179757	90.12002279730315	86.20348904399205	88.52433812557862	87.42504719610493	85.31560617619058	85.75164300863928	87.98026345902495	84.6646923774646	82.84532360130636	98.72801702747999	94.98647588364446	94.0435384781198	92.32052060440759	92.34500898362909	90.93765759135887	92.12414290135409	90.37523170198857	92.60155424905376	95.21439107719432	98.94266383177224	96.99497133495663	93.54973806377737	95.3615369021216	88.10565542026815	108.48827677481562	100.51036846557975	98.58859287366097	104.00861293998686	101.03537240635242	103.17896304523931	103.79497495685527	108.6893994224574	110.77866709508315
100.80153655946634	89.00360693666616	96.17166842386716	93.53087476429788	94.1628754615647	105.15899441944772	104.24556823873864	107.06459680227599	99.40343011463845	95.65206669159228	96.90463467539925	99.42214620284969	96.67809549096282	99.77978087712025	91.72541192521234	89.55537803465481	92.24492717555076	93.93503408883451	89.96630917230785	92.43593091098253	91.29754105593177	89.18318276645606	89.74011343564065	91.94194467746333	88.73429663466403	86.85472640570335	102.70027920839333	99.07544025568914	98.07639266477896	96.36560959533774	96.27668642101027	94.989329889737	96.2041337014793	94.50882892580078	96.74799144806632	99.38520916231674	103.0952425476198	101.25769218037033	97.77613631308981	99.6897279674495	92.15957120342335	112.64612098960966	104.96280016303926	103.07370313431603	108.44975352970361	105.45779610536061	107.46619592843253	107.98992358881178	112.72062084063212	115.05038382956688
106.62555602736244	94.78400777744122	101.98276395036461	99.34881893744911	99.9889003372082	110.97440728984498	110.01488588041116	112.75974022577567	105.12124781827994	101.38213590560261	102.6446771630999	105.17491138089262	102.44949617676573	105.56754122944089	97.52877609020997	95.34744339312927	98.018546885516	99.65989930353463	95.71104872562762	98.11486768623958	96.99628204803662	94.88407242077295	95.37345733423057	97.59227325592616	94.30924613518609	92.47392070130994	108.34485827321726	104.63497783925258	103.67978432705749	101.9598755354136	101.94492072127981	100.57855023315958	101.77102101416503	100.02853304524737	102.25539400825843	104.86795957365709	108.59660144896058	106.63015391766143	103.19597712771018	104.96159667396634	97.74693402417985	118.14217243817063	109.94388893769231	107.93214263713908	113.46536170275728	110.52744336074468	112.80300843968266	113.44636801006058	118.32586306894235	120.40932218154482
93.77218691698994	81.1797894252787	88.76669043310068	86.30021783309553	87.38929305643506	97.81722676475384	96.25555395147116	98.52008452336634	91.01723892038741	87.36063643874503	88.68367233760563	91.2961422734289	88.73104336264171	92.00285021381279	84.19755808800676	81.87092530946353	84.33569037051957	85.61171437820474	81.80412123237765	83.83263515250995	82.81206204859448	80.71714367178225	80.91334467456245	83.19086321006502	79.66344923199892	77.97103695472623	93.89848953508839	89.92802450773345	89.10068406031058	87.35573446895958	87.60624799054895	85.96180614493473	87.08845574835173	85.23094652168908	87.42700894597564	89.98479756765232	93.74698376625304	91.56364323979733	88.20238523848533	89.78205943801868	83.13018797062185	103.27131505163813	94.61217529741812	92.59336148748817	98.14030145347793	95.21881911945849	97.68709461815767	98.50443604719815	103.72971547791617	105.31559969630375
105.71495064978711	91.46569830821174	99.89576367927417	98.02595523368008	100.25690490800935	108.7491104175094	105.29857825555067	105.56696312042358	98.96318677499188	95.81330963721803	97.30880343473616	100.11294786151548	98.2453680384824	101.89507006218466	95.19645857592513	92.5360504267418	94.18858083303473	94.04589063686149	90.98715363886367	91.37026882088637	90.83349111683347	88.92961699476507	87.77646454369408	90.21100764158523	85.61782073005715	84.79747643792122	100.17100860899066	94.96823381484967	94.90848471345653	93.11396978819711	94.69037444295459	91.72246677231293	92.41489072952304	89.94608214168693	91.82303242954391	93.87385881122593	97.69534194846354	93.89112667247097	91.33402501550194	90.99235889171028	89.04467381072911	106.68384781210683	92.505378362377	89.43287062046275	96.20701199386434	93.95837449874931	99.25888989252005	101.5793998730883	108.82580520540346	106.81986826885428
91.09463708813162	78.08230369168297	85.88862382631193	83.5350695303	84.88586318066082	94.94416134613202	93.00413428976165	94.92666867314499	87.54071513321682	83.9537507458586	85.31566590086996	87.97763840861951	85.52936917226539	88.89214853825526	81.26526742493569	78.85478315975635	81.17321867396265	82.19105664072676	78.49692105926206	80.24355593127858	79.30032566907542	77.22518057022535	77.19219485483275	79.51055539214826	75.7887327802914	74.2232991400377	90.1567101690957	85.97645694969813	85.26092312496837	83.49861389993877	83.96333196443474	82.09703004154551	83.1640811698452	81.20583944941666	83.36861580777177	85.86902217015762	89.6578486424259	87.25059799031669	83.97563014392524	85.32672243124817	79.2720300571005	99.1490161489132	89.8371857448289	87.7219538796584	93.3927717481931	90.52463620394501	93.30811693174887	94.31798356112753	99.84944314106673	100.95665597848547
99.42174635243668	86.7988087516036	94.40823821389355	91.94737950772497	93.03748561801444	103.45980547453895	101.85367129475816	104.03801792863686	96.5661011728697	92.92559651634821	94.25759641679973	96.88085657873627	94.33627040925074	97.62191072261957	89.83460441660323	87.49972109787458	89.94619759099665	91.17306808002454	87.38905878497292	89.3485867233381	88.34973695496905	86.25950462452295	86.3852776676751	88.67759606021107	85.07498272077483	83.43245896288478	99.36624762208281	95.30775714089893	94.52938888513842	92.7768089069108	93.10645071860844	91.37930583279108	92.48008813155894	90.57358204452038	92.7528198127215	95.27963515018719	99.05743638446269	96.73292355339561	93.42971632109102	94.84041699478645	88.54973179777443	108.56465322275669	99.33231408711694	97.17524303119671	102.89562839422078	100.03946668980059	102.80800413444771	103.75885184545034	109.14425556280928	110.45254563577026
102.49772328334879	89.42942042270626	97.27550929470631	94.93411489427491	96.28680388948504	106.32987034003338	104.29514679735725	106.04642057744962	98.73490962245029	95.1858220411573	96.56435324863638	99.24551196492354	96.84200214618633	100.2305629995483	92.64530555839025	90.22026590595952	92.50067117358401	93.41818219505103	89.77644010624637	91.38167452499827	90.48399093221967	88.42174999683519	88.24726459063893	90.5907711438022	86.72495248724317	85.26400150549178	101.17846614215564	96.82332608258989	96.21065370003073	94.43625574696428	95.06278109071411	93.03035834914301	94.0417898438338	91.9873165656076	94.10991535975825	96.53991659924465	100.35243322319596	97.65625765185001	94.51116258298252	95.50607367897429	90.21597303545451	109.78825677480994	99.29156873938578	96.89144685898802	102.91057360312708	100.18886632329259	103.59677174873633	104.88495362960832	110.74367915530968	111.26174711574976
98.91321458970131	85.74271276126747	93.63888171595606	91.32936526820393	92.75698629241931	102.68974750204242	100.5650953603981	102.25091104303448	94.96247077484918	91.42829855788762	92.81380453373723	95.50369232343311	93.12662299151823	96.53422974302985	88.99742339889553	86.5528061085211	88.79673384777249	89.65892377154834	86.04230045372152	87.5930359465952	86.70929489210778	84.65184463018088	84.43947543061621	86.78794053083588	82.89768157211896	81.4538637835184	97.36261741060677	92.98480646238895	92.38404447169266	90.60820753002596	91.26368866748507	89.2019025589236	90.20663025397214	88.14374502119013	90.26348875726899	92.68975379174483	96.50313418009554	93.80250025789906	90.65747268416341	91.6583097085632	86.38928121096905	105.93644887856904	95.4998123009131	93.13124270135553	99.11308576091204	96.37674325642789	99.74556727962114	101.03153889806852	106.90890764702714	107.41034408739424
101.86402808486125	88.44121559291314	96.46899864331266	94.24027605599693	95.82818875863605	105.503123526794	103.10541124956072	104.50007598168183	97.33493396183403	93.87001129670526	95.28281559021462	98.00449523056294	95.72530681295316	99.19200328210066	91.80260141312017	89.30681114149554	91.43785144945413	92.09519537766762	88.58205473168357	89.89376539982791	89.08006215526471	87.04719721677432	86.63425353444917	89.01034751128901	84.95301644010506	83.63748536865894	99.48964226863755	94.91912827163996	94.43375777379593	92.64760255412101	93.50299929309634	91.2393397447218	92.17998321416417	90.02051160832562	92.09505727097894	94.44742579681278	98.27575898643458	95.31971517667358	92.29477870807719	92.9965409737133	88.44508216559606	107.63908589591132	96.3121363162294	93.76753129782364	99.95885447315457	97.32766912029287	101.15305408261406	102.67563859417994	108.87062161854944	108.81704925230399
99.34235292292642	85.6440146509579	93.80874154015765	91.68198571323009	93.47279651292516	102.80877005379749	100.1117333095517	101.218628889593	94.18045717169817	90.78966623654665	92.22768151627555	94.97747274694458	92.8048450102275	96.33007799607799	89.12141666935186	86.5709930657332	88.57106287328216	89.01246355762206	85.61210808813723	86.68267176359419	85.93794069276962	83.9331676858939	83.33066175470753	85.72765543739612	81.52910695038335	80.32964365381252	96.10475404706148	91.3775208481331	90.98908373483795	89.1968486882194	90.22822314455061	87.78914156120075	88.67447759799903	86.43982379425302	88.47554566339522	90.76778472107569	94.60251867610029	91.46604675053614	88.52916346491247	89.02803665655054	85.01524885648764	103.90328183146407	92.04688990629772	89.42256464948531	95.7071641113091	93.13151322158477	97.22008219347532	98.90246200846568	105.33427401796526	104.87655520805096
94.24277644085552	80.74794533132679	88.80692017801805	86.6060772722023	88.26492139385023	97.8340844401233	95.38815740793493	96.78691573055616	89.6134126298335	86.148236740358	87.56177102233202	90.28481773493967	88.01460364288509	91.48943708760143	84.13447397962484	81.62578505690504	83.73368798669831	84.37334997402786	80.86578806256419	82.17528065687264	81.3584085186507	79.3251571698081	78.92574830713234	81.29879864723733	77.26739865159765	75.93004227553632	91.79277613371536	87.26426096239767	86.75095297157075	84.96671000808348	85.79003600166395	83.55863131479101	84.51440815119027	82.38104782885024	84.47012118840951	86.84821510863797	90.67207854126578	87.82060467550096	84.74165727752971	85.58805131963796	80.76001270197277	100.06313540591434	89.24988754773375	86.84479629999117	92.87209450477374	90.16387722378418	93.7096763044093	95.12214671489797	101.21071879452899	101.37572668022824
91.48918832298442	77.13581538401951	85.60797300904251	83.80602329729156	86.17300439354962	94.41975532995917	90.87712065805766	91.1461996781025	84.52876730362347	81.38605774633135	82.88399472564535	85.69023423743957	83.8503387362181	87.51231608451675	80.9135418969962	78.23329887805208	79.82058844456206	79.61975935257027	76.59080490108288	76.93569603288694	76.40251730375344	74.50364047533326	73.34530641794423	75.77928822743334	71.20629348042023	70.36495231796704	85.77093620726984	80.62669561651008	80.52082824322333	78.7251841634914	80.26046605002865	77.3307331157012	78.04811106067844	75.6130551500438	77.52131975362344	79.62588274440604	83.45553598960403	79.82906657347195	77.15669726226135	77.08418408009864	74.6409065128783	92.53491223995013	79.30491647325543	76.48873213976857	82.99101257863904	80.56305105769557	85.33842136144432	87.45311503261158	94.51453829975998	92.94704133798831
84.6743061318095	70.64509274896076	78.96334675850021	76.986790849243	79.08233460538305	87.89492584534526	84.86312149763616	85.74111020869277	78.79671152664345	75.47298799278502	76.93194191406637	79.70408369385808	77.64388668102477	81.22713012624023	74.26259808975344	71.6478550465318	73.47990107472388	73.69628273906227	70.41312775406267	71.26382960004901	70.57449802179796	68.59702227364824	67.85261377297836	70.26050696720196	65.99023867863687	64.8517736945332	80.57596253381784	75.80112898118229	75.438332371556	73.64456371724718	74.76227818311725	72.23753039701693	73.10608244733605	70.85860768967241	72.89198454942265	75.18748109252068	79.02168662074568	75.94515879464848	72.96802319889086	73.59413639101567	69.47231854289014	88.33482115070434	77.08881791323594	74.6861946806761	80.71394346725732	78.02107538838726	81.7550249055843	83.34509865703414	89.75727015395036	89.41813362617646
86.81507680310216	72.28884142461658	80.83335273560289	79.15445237368111	81.72038764039911	89.54983361860573	85.73666152153878	85.74713572276718	79.27235038995586	76.21811286290242	77.73086060076604	80.54701979415674	78.82280947089622	82.51866952746049	76.15597886685505	73.44172596753151	74.87738769303455	74.46112855355287	71.5677522203123	71.67133048500389	71.20824636865872	69.35128397127323	68.01709696641379	70.45493965764243	65.78058237597656	65.05362336506852	80.30656223078712	75.05598478176663	75.02872222447839	73.23599514156142	74.9172622558707	71.84853667285229	72.51659627869489	70.03137274536194	71.90214448010093	73.95576847157245	77.77897430291357	74.04672762191811	71.43493705825338	71.24616650770939	69.18999512666316	86.7980146103908	73.38613844927987	70.57691114163605	77.07232280790407	74.64915330777661	79.50585851681237	81.70313045460234	88.90542008276282	87.1026351170482
82.62941310225055	67.85856970135599	76.48959149883042	75.05415963882193	77.97037796974571	84.97936221630698	80.64021672529312	80.08849058028149	73.95631807251704	71.1073046743874	72.64378128789717	75.46726743630524	73.9906994236392	77.73645641381334	71.87352960232663	69.11187610529643	70.23841069521586	69.37953242646925	66.78755107699979	66.3753779459326	66.0686655658712	64.31371296763118	62.5981094166184	65.03090142392799	60.145728652501056	59.69199448345561	74.51381857026382	69.01898910655474	69.18860087130935	67.41026957660176	69.42783176757916	66.0458728201373	66.58881393538726	63.98491263089936	65.74901835132476	67.65589408024428	71.45008999767373	67.40648226389713	64.99252362043762	64.4119508486892	63.47591574345931	80.2750107719056	66.03407580070098	63.11834013266248	69.72983444489394	67.39917903128232	72.67827512559553	75.15004557047044	82.73071463435747	80.21929522824423
86.4137872133592	71.59468937659678	80.23734836518855	78.8705160347123	81.86696667656385	88.64672492981421	84.12338715531052	83.31552343999739	77.35838570877357	74.60135955465647	76.14435288501812	78.96562120218054	77.58503843838189	81.34239581632016	75.64548120348617	72.87493607315447	73.9052941589773	72.88873586567594	70.41365415474502	69.8024203527679	69.56190997537068	67.85134463786649	65.98005913594778	68.4041219695616	63.43144237227898	63.10801541597889	77.68006435858857	72.05574254783028	72.34057222944085	70.57469428818484	72.75999481006477	69.22656478306891	69.69735694440077	67.02954778511554	68.72075468616787	70.5223543171319	74.28597182071285	70.00577579704834	67.7612395771238	66.83822576256381	66.71110873210785	82.94269548638391	67.77256340508306	64.65022627352121	71.47522115629886	69.30411442387532	75.08813523735276	77.80387198147525	85.65001302062163	82.55507605499827
88.8442377186285	74.09324447827399	82.71924499919261	81.2554129136773	84.11980200453219	91.22888382666564	86.89860690561372	86.29733741540872	80.205016174434	77.36612816049745	78.90304138590758	81.72648060461778	80.2497418246948	83.99451644183944	78.09517515843716	75.33736541570227	76.48914738195133	75.63914804334128	73.04422666032302	72.62713543771214	72.32724505865292	70.57415639194524	68.84225711070141	71.27373606235841	66.36792185905645	65.94148657926291	80.7023277928764	75.15666927163944	75.371169563873	73.59683694633333	75.66279060859962	72.23770714897688	72.75484250315921	70.12463900743003	71.85716443730911	73.71347441850213	77.4928634051726	73.3120025146816	70.99717240591986	70.20334441819823	69.68454899563739	86.22552947656551	71.28600835953948	68.18389826225172	74.98853027175903	72.79384207986976	78.46088933777388	81.0910962204206	88.81794362372251	85.95169488556833
94.1757499227381	79.39059604521596	88.02616052843675	86.60501469447958	89.51563056385595	96.48314118832413	92.01750516734685	91.21174507041759	85.26123065494804	82.49289167503751	84.03478807173039	86.85670452556707	85.45070871898639	89.20432075374528	83.4165645621769	80.65241493595292	81.74061307382992	80.7771555686842	78.26665488079502	77.702927344901	77.4531259500032	75.73270876640142	73.88357471850053	76.30806445026283	71.33451298462936	71.0090885621933	85.56765494771392	79.91536849031752	80.22649987584023	78.46315689356938	80.66436165225879	77.1179202399941	77.57520707639502	74.89303062943502	76.56263784242051	78.32654687970253	82.07581929084883	77.68767408583408	75.52726584915236	74.42591960519296	74.60991562223728	90.64917752375658	74.84654033930157	71.54906846124905	78.54436287497931	76.51419935433212	82.65418933209956	85.50703325363239	93.46706177677589	90.0638476333699
93.62995621800209	79.19546978350736	87.70348455801835	85.95424020517748	88.39883957410004	96.47249957033526	92.78198526211179	92.87057843527609	86.35795386279837	83.27240054391791	84.77978163972827	87.59259068834028	85.8193903568417	89.50052338821561	83.01544355533777	80.31907780971503	81.83349974148253	81.51154782957545	78.56061821797982	78.75829989681012	78.27131184465358	76.39820498057612	75.12216688986419	77.55933264405029	72.90734254834169	72.15353673159113	87.44026561480317	82.19533645556778	82.16524301046042	80.37216121055825	82.02716908855504	78.98391402475437	79.65568073152916	77.17040944260418	79.03806018790203	81.08215420377215	84.9033167828152	81.1204960581942	78.5442607244873	78.26447802736187	76.32118090533179	93.89821897623683	80.09614636413477	77.16155128514066	83.79189211771805	81.45003104765732	86.52896125081197	88.79692182075706	96.04185401509655	94.10783546200219
98.67995118021203	84.58989552030798	92.94424572071053	90.99142000962478	93.09566870719964	101.85543565110726	98.6660928406754	99.2621743215408	92.47541075409302	89.22845783129797	90.70468018033665	93.4926367430531	91.51127132345658	95.12181569520014	88.24285725553956	85.61441381026438	87.38641111702229	87.4545180937999	84.26533235890322	84.90698695978332	84.28882400253673	82.3432213397623	81.40218902554483	83.82648262464849	79.38524777159813	78.4080464559494	93.9753212010586	88.96836835974332	88.76606903398654	86.96920333952754	88.3225280838669	85.56812861223177	86.34475693844946	83.97358883570165	85.92529698663168	88.0900122267453	91.9247822321322	88.42949956832288	85.68524336766093	85.75266708145199	82.84430995903632	101.07401676085699	88.0687549827857	85.24341533362488	91.7548168797851	89.3215409848922	93.99824578461954	96.01066080275461	102.89219126856128	101.61993393693963
99.99966098570019	85.63100296927789	94.11237392502791	92.31682369372325	94.67702387545013	102.91366930106234	99.30049317129087	99.42759994769703	92.89893668559331	89.79687542897166	91.30109686663229	94.11172078731728	92.3096501390955	95.98105461206593	89.41899515201716	86.73535499641233	88.29954548183065	88.03404026078476	85.04998354546004	85.30036295262751	84.8010656671218	82.9193357144008	81.67271900069065	84.10951559978292	79.46530096976842	78.701981718561	93.99893043661805	88.7469149993208	88.72339287752851	86.93042809575002	88.57953082734429	85.54237646775691	86.21164471092247	83.72076090293841	85.5813609861825	87.61132136664784	91.42962868618041	87.59170488797156	85.05325752196936	84.68266995346087	82.87979166962288	100.39557203439693	86.23916352348799	83.2005254443616	89.93989604436186	87.67097892713764	92.94929754904467	95.28780921571928	102.58575770632334	100.50906422458898
102.28986398939311	88.29155397251755	96.60394911880269	94.60516546814655	96.62309425972906	105.54086117498217	102.45933744348218	103.14561974305295	96.31541926266746	93.04077718991307	94.51023407601056	97.29180301767647	95.27027845541507	98.86373440248111	91.90373310332987	89.29318532428005	91.11961394854175	91.26548145184003	88.03230866045057	88.7564874603564	88.1155399697516	86.15799745711689	85.27550957445835	87.69641362636918	83.28969419557272	82.27900255814444	97.88230921967762	92.90829900484009	92.6840039061707	90.88722970099069	92.19482138564233	89.48490055380944	90.27509659996151	87.91837170401237	89.87879949449038	92.0549334778217	95.89031350641577	92.4152180559475	89.66137505944387	89.74328740823441	86.75365276127008	105.05099896687626	92.02592134517916	89.17621143604859	95.71398335036062	93.29378293240717	97.98856320826216	99.9906319461309	106.83823150200566	105.61060289525246
104.79560853775766	91.07908382817786	99.25578218310815	97.13440772103625	98.92530329217428	108.25251412103349	105.5128763405719	106.54076915710806	99.54419175528108	96.17350150136105	97.61709250681115	100.37256112517527	98.22102826098258	101.75502633128492	94.56729687142466	92.0124660910812	93.99648219492039	94.39618520842892	91.02084332207455	92.03225596119924	91.30744766963079	89.31062097788217	88.65132101430777	91.0545588730975	86.80425628169463	85.65014477324969	101.38966065136749	96.5932543008043	96.25077241435329	94.456652249854	95.556139853394	93.04984246599037	93.90930241203756	91.63788295112082	93.65124188114432	95.90690778177112	99.74345402936045	96.48445648251273	93.61388669406014	93.95151289768341	90.28612305694995	108.9997321961637	96.62569782273104	93.87868231408017	100.30222591366582	97.80421817419774	102.1694437382887	103.9758363726691	110.54680694132077	109.81477448654189
107.7919904805497	93.80630873462574	102.1148612189278	100.10842653826487	102.1036003068576	111.05439620486372	107.9676705526911	108.61462847555423	101.80905933085987	98.54418654620966	100.01553365936259	102.79873479713261	100.78374135431592	104.37847387905472	97.41490877928584	94.80636398715109	96.63465184416242	96.76924447219372	93.54479785412975	94.24567784866196	93.61420299595734	91.66053407287428	90.75129316876811	93.17438617108901	88.74087598500692	87.7562355852382	103.3310233069989	98.31512064044576	98.120968299315	96.32410146447984	97.6713775154534	94.92321997801017	95.69637814448387	93.31714030379048	95.2607191493624	97.40930369583093	101.24271822373704	97.68003553010875	94.97870165397222	94.93804240242083	92.19999213468688	110.36334873283529	96.93501741237688	93.98584212750521	100.6307442419052	98.27983412119207	103.1937043147767	105.28968069730418	112.23413010761266	110.79906862101724
109.11973891354923	94.93180931526582	103.33506666032807	101.4300443253874	103.59732067296402	112.2113483791053	108.83856040072132	109.17131788902711	102.53446452558133	99.36320001197728	100.85444192169352	103.65515337868628	101.75737723314818	105.3961565632065	98.63426965709006	95.98574025040608	97.67956717889611	97.59396905080347	94.50137955949634	94.94510374937933	94.39149398912222	92.47789499243257	91.36683327577352	93.80007170659131	89.22961062940352	88.3846256028611	103.79000652617728	98.60808094675505	98.5333603590517	96.73830863884582	98.28306095252232	95.34544593501899	96.04749042648406	93.58775234830996	95.4710317046909	97.52959792161379	101.35214585758311	97.55810584267755	94.99600769672368	94.65964218492852	92.66141532822084	110.34799237739621	96.13286576210983	93.03826981157242	99.8349539316838	97.60082823263981	102.92621790075552	105.24450309924869	112.47268351309734	110.4861417006399
108.55917856621241	94.2475985543423	102.70614443095228	100.87222798199429	103.15712751292203	111.53206662230494	107.97300251230592	108.10569246134867	101.58085311257067	98.47265568256358	99.97528647627847	102.78470392607393	100.96521946985891	104.62968618017362	98.00940636880033	95.33662648134239	96.9385974476574	96.7089066867565	93.70552493215382	93.98254538209997	93.47931024988156	91.59368541044364	90.35521154807122	92.79207702281039	88.14127318636062	87.38472097050061	102.66831393272244	97.38985808401821	97.38786634675078	95.59570093185933	97.26154261579717	94.20918677297648	94.86703025965068	92.36108630384425	94.20622601344994	96.20930340738896	100.02197859352022	96.0970466390919	93.61773392204518	93.1127187241086	91.55218799427452	108.93796849377291	94.3026283401708	91.13617811543693	98.00524340326508	95.833691820763	101.37837454626631	103.82105557292614	111.21038614526499	108.90758924478281
101.57890113396144	86.99627049388805	95.56597884272449	93.92696313834298	96.52229401877932	104.23351104405025	100.22254573151932	99.89266470571674	93.63905183427269	90.68978125826885	92.21509151547897	95.036975871682	93.4148158406353	97.13156276327786	90.89766355865305	88.17219134539158	89.5309237993653	88.9450198187652	86.1718818797982	86.0429809457366	85.66122918247979	83.85013480754306	82.31336863940477	84.75040727371395	79.93168704006949	79.38099279921977	94.34441457780622	88.87261717428176	89.02506521256798	87.24377016788402	89.17498103092625	85.87480547831811	86.43554284290555	83.83846010740271	85.60026522300393	87.48761492279043	91.27351223111152	87.11040915484791	84.78885303802805	83.98154097746225	83.28495502213929	100.0246814360881	84.75953960882886	81.51471684554882	88.46034211936093	86.3684007559289	92.23443111495307	94.89043317580173	102.57667234034156	99.7054678255071
104.05430235815095	89.25032130066165	97.89062464676887	96.49355192706616	99.419719891813	106.30890993639777	101.7269580588946	100.71301476078449	94.91411454719217	92.21459913836989	93.76021386898667	96.57926700729664	95.2363704066674	98.99611211215374	93.29042791648317	90.52291671742884	91.56767624931851	90.51004527169736	88.07243345788369	87.38027405384636	87.1770548300045	85.48660476161467	83.53131656851474	85.94675326763559	80.91181858663779	80.68447447508612	95.02147345635248	89.259219806821	89.67617263047698	87.92705695636403	90.26656146328217	86.598480125462	86.99080070161652	84.25632305234872	85.8527957202612	87.50749630621455	91.21366208735863	86.58805072327169	84.61808969719866	83.14941887243697	84.14109853806448	99.57640857782245	82.71312544623055	79.17377595354525	86.3837372667617	84.58454537025895	91.3129717560527	94.43609136246	102.66344181569289	98.59632929939427
104.97205986717951	90.49880705278514	99.02560703696187	97.29977433477431	99.75984181106313	107.767316844063	103.95024889016244	103.81789729804296	97.44598369070421	94.42667070722749	95.9430061731299	98.76098744779195	97.05239250612078	100.7484854944233	94.34164717320631	91.63737447269703	93.10382650065907	92.67269556712188	89.79759724959456	89.84495440706051	89.4104295968256	87.56581239326664	86.15727056039731	88.5956455925944	83.8463001631951	83.20660246363191	98.31443542070521	92.92184241375928	93.00938232496799	91.22272263080426	93.04182024109585	89.84570424757989	90.44775768309891	87.88792524796345	89.6853186508191	91.62134784411907	95.41944936110133	91.35190071572251	88.96575831655993	88.27966654930297	87.22603824966174	104.2397175052829	89.21015781091187	85.99026432326336	92.9118577485654	90.79244165943774	96.53921821972061	99.11131340767638	106.67854894190661	104.03391223333746
109.43570575508693	95.01042374887795	103.51811752695875	101.75715916484596	104.15631588488212	112.2864347394691	108.53515233585065	108.44987645809309	102.05315849595708	99.01557492453497	100.52910775570331	103.34553213092998	101.61030317307842	105.29876094415383	98.829303503077	96.13427140030323	97.6404803264027	97.25924808380307	94.35313527721064	94.45183355909448	94.00357140352341	92.14980560174698	90.77446944388004	93.21285200582147	88.47781520532216	87.82005182091149	102.95379930211439	97.5697390374112	97.65089271490666	95.86362451669109	97.66324479900564	94.48560023525366	95.09256377798451	92.53594206123223	94.33501866044381	96.27110064719203	100.06878486513564	95.98960405708712	93.61291544241335	92.90160209479438	91.86169965535328	108.88250968101828	93.71989861769833	90.45670229768295	97.42019543351144	95.33501748277408	101.15898592405468	103.75306797278138	111.32853656674928	108.64409073391171
113.59873215966773	99.22819001703951	107.7134475065849	105.91502192184079	108.24948028415304	116.50977239335799	112.83521658535614	112.8125568786022	106.38162328701073	103.32134313083877	104.83132178842212	107.64559939145572	105.87904598909917	109.55826048028985	103.02025784320693	100.33577545950833	101.88554912218403	101.56232177081002	98.62009932983521	98.78046581147699	98.31500499633842	96.45033277017637	95.1169111374477	97.5551383200412	92.84059323924741	92.15773895592639	107.32862760853689	101.96223731398445	102.02967426524629	100.24135223906531	102.01102698090837	98.8615906319768	99.47780817687176	96.92884673735877	98.7339881904107	100.67682491583905	104.47579988803521	100.40172119927296	98.02287709762298	97.3103466952219	96.23073861070944	113.29435533894372	98.06931642694104	94.77888040557193	101.76842322676202	99.70421557964455	105.56694229811465	108.16507425472994	115.72943890448587	113.04829729461703
112.69564191958217	98.17172201527056	106.72022868137813	105.03025356435053	107.53344105157962	115.42607473958735	111.48169651662005	111.16116793354317	104.9101294984052	101.9502551231159	103.47377449123401	106.29499409444159	104.64820140044557	108.35799785183644	102.0426913394089	99.32844683801864	100.73915617480274	100.20341128718874	97.40031359743821	97.31330959207042	96.92377343745451	95.10534349346725	93.58648305316513	96.02359487983367	91.20245117167737	90.65311290848356	105.60458946117635	100.10593716086862	100.28202611801241	98.50236220120607	100.44833064176595	97.13555159045907	97.68414196069692	95.07263645675664	96.81586828098985	98.67048212769647	102.44562100013938	98.18387726545245	95.93600324144458	94.9703093495058	94.55194944810465	111.12561331836709	95.29449127418285	91.90140678471982	98.98577652791025	97.02234259915748	103.20574183070612	105.98635068713526	113.77827631913327	110.6253808521491
109.25701123876686	94.71762260779528	103.27172966177051	101.59484041017714	104.12238872964376	111.96804364222143	108.00788675671909	107.6884486240842	101.43432992185792	98.4761566423725	100.0000362751547	102.82139947364551	101.18007724956526	104.8915528363945	98.59640579386812	95.8792163660531	97.27700513432946	96.72972102863628	93.93327326127898	93.83757633772865	93.44926571992893	91.6322835610465	90.11072391331255	92.54785974835032	87.72870049281728	87.17726285229863	102.13511313585308	96.6456920574276	96.81369502971965	95.03343339169503	96.97299736392164	93.66582885618034	94.21872548398039	91.61204123472974	93.36135110694603	95.22641134225822	99.00503869370085	94.77347865632724	92.50295367462265	91.58518311432385	91.07982411704008	107.70746432415817	92.04353046340682	88.69290665856273	95.73844912271547	93.73676340527923	99.82659004763711	102.56951942688156	110.32857605610282	107.26234521339676
115.69894151142287	101.08108746736787	109.66560542333777	108.05348160419543	110.66780686830762	118.2976045070327	114.15027174337604	113.5820490463394	107.49041886573917	104.61551628449496	106.14797890973963	108.97145100365736	107.41996693655452	111.14909202573048	105.00414313721456	102.2717990224332	103.57929522617975	102.88055706893688	100.18929389954265	99.90692256760858	99.57946111356418	97.80034489880813	96.13319215111062	98.56575405320268	93.66166517101047	93.22585414212078	107.9681326134159	102.35712901628227	102.63153818114667	100.8620994160256	102.95819148570395	99.5087730780785	99.99603321447296	97.33144981895376	99.0144059900486	100.78222519773678	104.52879831731212	100.08537302662094	97.97333158911343	96.74856270603472	96.97060256529035	113.05962541646606	96.56928516724604	93.05155102892039	100.24455672082179	98.40833457873728	104.94831372111571	107.91670367879225	115.92339446481118	112.29052942981745
118.57420448867396	103.99890016660476	112.56798632992432	110.91809996868419	113.47366416247618	121.23391666866038	117.16542661245266	116.67368989156031	110.534484917223	107.6307529186621	109.16025663040654	111.98326262791183	110.39613340548226	114.11805516322597	107.89849046041722	105.17428395757092	106.52737377294473	105.891386230927	103.15777859829831	102.9457275145249	102.5973734139496	100.80409492487314	99.18633709003231	101.62065393609484	96.74027438685127	96.27038554949333	111.0741124618045	105.48896986638808	105.74040758978342	103.96819637071738	106.02344919081021	102.61128141767988	103.11370437366072	100.46098126735252	102.15706586435803	103.9419708825588	107.69405787646416	103.27803944395235	101.14569742433153	99.95542267733117	100.06086123626358	116.24896270838678	99.80150477140974	96.2823155173184	103.47673115111316	101.63943270818986	108.15930932678152	111.10615443274382	119.07835825538633	115.5085723248079
110.8755592471523	96.1488941544979	104.76938401171633	103.2689833966987	106.04721841243129	113.2928197207631	108.90636255375881	108.08483809161505	102.15813936424	99.37915279104868	100.91970296665805	103.74224378306454	102.30383870427194	106.05172649238011	100.13670787263649	97.38367411686326	98.55309703650556	97.65988633899325	95.10432586248957	94.59840934438125	94.33928337822726	92.60739380793274	90.78062310298624	93.20500926653011	88.22451890392148	87.90504810290845	102.42357064808733	96.72060547126175	97.0799803464758	95.32178460567387	97.55879627712842	93.98235487304969	94.41408579690695	91.70692515418541	93.33816464064866	95.03634188187469	98.7581256384048	94.19347553700263	92.17546768381393	90.78416409699578	91.4897509431861	107.17913369844302	90.37314993272634	86.81703616950433	94.04137909811048	92.25244212149032	98.95768534973413	102.03736180509453	110.19007292499775	106.25416801693261
126.0624791893681	111.14312744920002	119.75386687450666	118.73386132370361	122.09087098535285	127.66726926153437	122.20634492389729	119.9832833774654	115.12314821650133	112.90325875652655	114.45250483569352	117.21383859916476	116.35572242325209	120.1220591646076	115.32312947671471	112.53724192240519	113.0911666960462	111.2996891955421	109.44883083233047	107.85775664178296	107.9560756458617	106.49858133687965	103.90021061226601	106.2189176217356	100.94483153782232	101.26977596712399	114.14631709263047	107.97786877683437	108.88292673771295	107.23883757279442	110.25496812808294	106.01955696892838	106.09076587653827	103.17781643443556	104.41139112606817	105.5593603249638	108.99481644206831	103.55261239273989	102.3790907003183	99.57215422377952	103.86707369519917	116.30786209035546	96.29957015219138	92.18259593145501	99.72648092073226	98.74064430749726	107.24276303475712	111.29760326617463	120.45069112569995	113.86289674767589
115.41668720206813	100.64730479768997	109.27993740148248	107.83104160392348	110.67368063568388	117.74435280904613	113.2194113271754	112.20993706122827	106.41529798557994	103.70352470607853	105.24818950687374	108.06818080543523	106.6999893745694	110.45634322303258	104.66345179612726	101.90244461466155	103.00182114257802	101.99563408889658	99.52329080743748	98.87816708621214	98.66508170324155	96.96456936211742	95.0325897604757	97.44884761384465	92.41530446745965	92.18230691876694	106.51197272955359	100.7282309559702	101.16665972693669	99.41999632411404	101.7701683896955	98.09392624384009	98.47570777852445	95.73110719647515	97.30921579256464	98.93096618862735	102.62086792860921	97.90747074286855	96.01274413743036	94.3955675358472	95.64215224981145	110.89653226506739	93.5078908571368	89.83698151359114	97.15118151598656	95.49142447759864	102.51812661079457	105.76078781883447	114.08564703213271	109.72898407864469
121.51933895238167	106.72457180727478	115.36343674895939	113.94836632600362	116.82943913319775	123.78521992395547	119.15823133588407	117.9977006152429	112.3129973723942	109.65446842953995	111.20168010211299	114.01869799871574	112.70359493747618	116.4650597706642	110.75862511882488	107.99296474024271	109.0442924144766	107.95587341600393	105.54569768938589	104.79690980883217	104.61915677155802	102.94286190050535	100.93168478226886	103.3403008230375	98.26773450934094	98.10251375221296	112.27207196473712	106.42374848205756	106.92856263291006	105.19261819364918	107.63366388616666	103.87846135100652	104.21846790922181	101.44442910299344	102.97609474832214	104.53030047986097	108.1890168280083	103.34694233733205	101.5644020409898	99.74562139140718	101.46166654425228	116.32676349894267	98.40697256840716	94.6306629390511	102.01931846705955	100.48842414959947	107.81125191135327	111.20102865337495	119.6744082794937	114.9334980566737
116.92181681790161	102.04493547327667	110.69321805667896	109.43177042986892	112.51433651912937	118.93755528033026	113.99876198308017	112.47904209364783	107.05587031447266	104.54462920401198	106.09630111515986	108.90003283950246	107.74723170681979	111.51889307499738	106.14642567285745	103.36604112905441	104.22698201673326	102.87582592964755	100.66508900718938	99.60809525678052	99.52791011768736	97.92632100038614	95.69977047333022	98.08401611807433	92.9275866643979	92.93193046083609	106.70537415324847	100.74274905119128	101.37446442608913	99.6634812770039	102.30073399415734	98.37647995614569	98.63117369134389	95.80574810799614	97.24961571782498	98.68646291553412	102.28943522242663	97.26780743416059	95.6504126936514	93.55646940700294	96.03972497710443	110.21662268272644	91.76410915684684	87.9103254048518	95.34684977409628	93.92640822132135	101.54127853210345	105.11108644917182	113.79111371989698	108.55578371883287
108.95275771896065	94.03620599823856	102.66703210239952	101.56762165492998	104.85171604030792	110.71254549130376	105.48302069685596	103.63808678088321	98.46288831412777	96.09791860165969	97.6499840617873	100.43420588749072	99.44206355731781	103.2142263710618	98.19365872691444	95.40728980275966	96.07057431263641	94.46242943456492	92.45593212898336	91.0982621373657	91.11297556199814	89.58987674430844	87.15947960914158	89.51370558654831	84.29196899521132	84.45964881007883	97.83194516463806	91.78072798788608	92.52206477029821	90.83684608580224	93.64764017381353	89.57708148722293	89.75490360375807	86.89006512696386	88.2550675080944	89.59134337465345	93.1440263630953	87.99070580837589	86.50326914541034	84.20405538291935	87.31909402924539	100.90365009862494	82.14835157939588	78.26536317982305	85.71772307875443	84.34694300385249	92.12626351919315	95.81738311860161	104.6444951180157	99.06894205304505
99.18851429385371	84.27072437478317	92.87456975274404	91.88677474966437	95.30724386729017	100.78411811454063	95.39570387174251	93.40432452874518	88.34167107328992	86.05653411789828	87.60715008838324	90.37783910574447	89.47855764660378	93.24655275017764	88.45820429719663	85.6731752113526	86.20394361029561	84.4417541458039	82.56157718289026	81.02759123860922	81.09562105163553	79.62113275540447	77.07681121966584	79.41236571698	74.16239964131168	74.41845615946157	87.58848591220584	81.50953707706043	82.28883539643813	80.61462440214261	83.50067336070839	79.36678629317139	79.51400717697943	76.63623716623482	77.97521564754133	79.28619144948836	82.82970861412406	77.66851506929174	76.18942587925694	73.88948811462323	77.14524248572029	90.58431219246044	72.02830025272515	68.21396289583576	75.62444574710761	74.16891283998531	81.82865543290887	85.4962128786508	94.32904015250426	88.80593946141178
102.61227302356873	87.70199844563503	96.2863046961005	95.35548633927024	98.83243819408175	104.10815176396282	98.59132651447067	96.40906633260724	91.50584783867139	89.30065426992299	90.84899756220722	93.60581478305113	92.78342179680772	96.54615527054375	91.90236244154352	89.11967309835887	89.57635050234238	87.70475669639845	85.91882586654873	84.24839362913715	84.36375108472609	82.92870599203506	80.28908608163361	82.60395515043206	77.32772880632365	77.67151705610029	90.57832684215892	84.44251952831377	85.30143096523433	83.64776005997082	86.63837121029269	82.4204342444904	82.51431337633637	79.61274738117085	80.88802880239683	82.11069598022574	85.60224796303359	80.30839493688923	78.96977592998427	76.43996011515486	80.25362680678062	93.1676962680493	74.06748684610832	70.14645887607834	77.61829778018182	76.31153194467561	84.28218656535003	88.10758418549776	97.08719061722167	91.13752553613378
98.59393712612543	83.70781983278533	92.25341735570882	91.4182318036445	94.9987555532434	99.94343561412666	94.2768953354572	91.91975172161526	87.16301119880205	85.04659533083334	86.59113008224963	89.33010910622225	88.60116958769373	92.35446317235274	87.92572411129454	85.14949980754794	85.48937691854289	83.47432342757685	81.81329966683968	79.97175074262141	80.1423849941243	78.75837180266363	76.00647791774553	78.29662674533834	72.99761288943519	73.43854488026045	86.08041463070245	79.90579518146565	80.824802847535	79.18917031949165	82.272449632703	77.9801889322324	78.0297341190845	75.11164661108947	76.33933622742718	77.50376699794447	80.96329423866224	75.60553287584928	74.33876674750549	71.70167051339624	75.86455865305373	88.43618200136808	69.21506021882752	65.28814137018213	72.7623736232127	71.47003204345756	79.50731927384908	83.3891707053034	92.43560633050453	86.32790339086206
96.42886691857606	81.59741710015193	90.07764283703757	89.36930034180025	93.07635484449222	97.57858246548476	91.70333510853519	89.07440476050759	84.55530750497113	82.57387627308742	84.11061658456805	86.81977506387501	86.22614826808008	89.96099963952229	85.8310769070516	83.06813748317114	83.25120081288281	81.0382814119193	79.55606104791137	77.47385220594586	77.72494255769922	76.41632718236231	73.50669844790637	75.75577491350413	70.43181869700385	71.0170224682639	83.22677931359414	76.99286397395674	78.0131431958816	76.40957424424404	79.63604976345165	75.23234103722992	75.20860127842754	72.26680483647758	73.40992976318007	74.46636931854117	77.86056404349908	72.37600589857281	71.25897262567872	68.39482482414951	73.20199216765685	85.13174636608953	65.52449996906509	61.539914536188505	69.04075376617288	67.84242023398897	76.10120680885852	80.11821040044275	89.29820683792502	82.81608656052335
89.11877664997003	74.20193706269154	82.80297628891225	81.82888268167464	85.27929398010919	90.71617516524472	85.37551008004651	83.52253207430688	78.34128316978806	76.01491799611647	77.56622594456955	80.34260121694447	79.4155452101143	83.1846150492155	78.39246923603555	75.60794178665833	76.13082572790701	74.39275580462493	72.48956187198799	70.99790646811506	71.04524077189863	69.55834038802722	67.05265831066939	69.39877440646652	64.16693781446546	64.37552265689392	77.7240650501071	71.70611505571162	72.40756462913677	70.71633251160745	73.51913804986255	69.45175114963956	69.64637197083272	66.79421127796958	68.19700840697695	69.60557829914657	73.20623709518065	68.22848300762396	66.56752314304305	64.588061608337	67.18792022318698	81.19631817064582	63.59411165206584	60.00684019145137	67.25321519543598	65.53537877143093	72.6501250918257	76.07887333755356	84.70777312365381	79.79905616721466
88.61268824659405	73.81687113534424	82.25984493935385	81.6149584189995	85.39133475934526	89.68408037287692	83.75888300611491	81.11828315882701	76.60652935945107	74.65244924442267	76.18681235568644	78.88834803680862	78.33194656126506	82.05972179033184	78.05533533640765	75.30143191776243	75.40976121716064	73.12726059831297	71.70880664268691	69.5476447592974	69.82064911837881	68.53781316405238	65.58129718540846	67.82036178909519	62.492781557675556	63.114521859128146	75.27109941673045	69.04412078516708	70.05425108934999	68.44971078709509	71.68409255683915	67.27263027910605	67.25007121294175	64.30966758405398	65.46351245969072	66.54624064689105	69.9643206158435	64.54236223500834	63.3527070098642	60.61289086970378	65.24783729282079	77.34983860681533	58.22342504811688	54.36290960547094	61.79893344300924	60.427959697239096	68.404387901783	72.31217492980858	81.41841418621858	75.23360530913676
90.87757241472033	76.28656711578262	84.54112812034232	84.14565774847519	88.13285468705477	91.54008915542383	85.1947025128692	81.92600740487582	78.00699390737928	76.36837191476462	77.87496330399746	80.493249130964	80.2324702367943	83.89768236093049	80.5232415686393	77.81553611022484	77.61368170109064	74.93423756277687	73.90311432210413	71.2470626446196	71.69411428621108	70.58329232539978	67.31110209083451	69.43789879152243	64.10258519131587	65.04139196157288	76.08982264054065	69.750418385351	71.01150650534579	69.49813737675005	73.05191806929969	68.4080915664805	68.20403593243829	65.22681059542526	66.15220768159519	66.93614079459552	70.15096117179358	64.38976102520724	63.646356597715204	60.24353691194647	66.60558276700897	76.90865475323542	56.468720718794884	52.364327462985344	59.903905867540466	58.924736006290324	67.67285227112279	71.99377914557628	81.45297099559988	74.11904300441599
97.96756345609971	83.28527736476664	91.62059400732501	91.12583826509609	95.02306671213796	98.76698805957479	92.5283520873832	89.37051788773908	85.34396351432625	83.62481054990995	85.14027649161017	87.78263355381979	87.43813315184025	91.1249868786612	87.52650193009767	84.79733825964796	84.71582872920766	82.16346742256185	81.00518514530512	78.50339220395296	78.90037324444914	77.73346343305451	74.55480443507265	76.71449251958916	71.37528992625563	72.22351096377301	83.53012927844024	77.20164216163924	78.42846269410943	76.8988549288323	80.39238450853617	75.79222205778369	75.61949969377015	72.64575046684106	73.6033830131776	74.41693313381363	77.64461698138946	71.88911796366683	71.13247761034253	67.73937185478414	73.94242711069266	84.39666616906567	63.776718601731886	59.618533635733755	67.16648508441943	66.2854743715156	75.14198777595213	79.48883383974426	88.95199109038508	81.53344305717663
122.48515199954028	107.5823045273469	116.22493702619508	115.04401867984834	118.21882152009924	124.36111959590976	119.2321082066091	117.44945257799534	112.23120980185536	109.82378756748082	111.37614647039759	114.16725754229999	113.11904689070879	116.89213292986265	111.71400447798831	108.9294406529132	109.68552337187472	108.17683258310922	106.0920559478861	104.84222872904085	104.82685914155574	103.27532602496764	100.91110942278443	103.2741835878496	98.06737335429169	98.19008050898692	111.64534625748381	105.59612682746372	106.33366881968611	104.64594535662529	107.42901354897724	103.38296855732216	103.56806370625874	100.70500044280104	102.06959662476699	103.39555499539438	106.93767727107311	101.74024448629675	100.29776837589637	97.91314631555832	101.11268360661309	114.6301423471823	95.49807414911109	91.52211992253231	99.02188904404346	97.78373836955583	105.78321289863618	109.55603200365363	118.43598176049203	112.64569091980817
118.73318506789929	103.82293937907576	112.46108324168961	111.31562651136414	114.53596482358788	120.55495698087559	115.37012267766146	113.53334616567365	108.35620444498129	105.97571692679269	107.5279530599435	110.31507044154499	109.29789379140949	113.07066949739598	107.96636779970807	105.18072956003066	105.89485825015443	104.33527223740683	102.29098348116023	100.98314328089376	100.98546013388292	99.44925477702022	97.04709449389154	99.40443131607596	94.18704484070417	94.33893309141132	107.72513968848548	101.66437820272087	102.4172240277131	100.73359494115542	103.5442459636891	99.47497329231851	99.64850503312546	96.78023872774712	98.13407873782869	99.44796672011924	102.98457504907266	97.77716739430964	96.34515610249056	93.94686108940293	97.21758528680455	110.66469458006242	91.55384427975127	87.58851899996002	95.08332270074794	93.83048521070086	101.8161608597442	105.59164318665763	114.48183507816346	108.68171020600117
113.29671214523039	98.3774927262611	106.98763240350185	105.97334710416443	109.34832897911346	114.90992564594856	109.4929628278389	107.38325405455346	102.42446712181533	100.16974945835122	101.71982338041475	104.4865011892007	103.60320938071206	107.37077378433293	102.55871227613196	99.77295312376754	100.32678106495712	98.55960468844242	96.68635905470416	95.13321608533835	95.214402210063	93.74579694248317	91.1790656530402	93.50672136496195	88.24436879403216	88.53325922081842	101.55484036679285	95.42554706208594	96.2733490823292	94.6148895839005	97.5694490396449	93.38202046772487	93.48845060392152	90.59066752195028	91.87217317370181	93.09318725963313	96.57837062469602	91.2548879552204	89.94769817487949	87.356708593484	91.1964903849821	104.09116428181261	84.67288637696427	80.66965059844959	88.18007305872644	86.99385290132005	95.15181587299381	99.04264276560933	108.05979400048973	101.9348186629691
111.57335410769493	96.71683951963209	105.22492525110222	104.4623360138909	108.10091986179808	112.77641276966776	106.90777400619481	104.2010486836915	99.75647259113425	97.7812800785253	99.31833147328057	102.02778314966005	101.42444863693721	105.16222631355086	100.94463992331151	98.17503089956847	98.41788950257337	96.24331378679942	94.72756541441574	92.68181625468083	92.92788029131734	91.60755868911676	88.71462671686211	90.96330601848891	85.63845138525978	86.21966682421667	98.35214418374991	92.08995797920154	93.160425806132	91.57021169475193	94.83361073196846	90.40430689441769	90.35330985990493	87.40270629833832	88.500022846484	89.47907779521913	92.81136399638385	87.19617539264918	86.23964615434436	83.12027328459435	88.39616442346802	99.82612487779303	79.42982643157721	75.27653116328526	82.8244263298551	81.9216238638251	90.64707637301078	94.86964354055661	104.20048598334702	97.13094806955337
114.43731226141543	99.52926685433691	108.10878734855213	107.18722467011413	110.66120138251421	115.89624304430251	110.29939804978504	107.94711615659892	103.19247654306899	101.04587052820133	102.5922324177684	105.33885296015539	104.56358727253156	108.3227295302409	103.73160156454124	100.94933246640922	101.38724888046731	99.4623415764933	97.72448733777753	95.9799584236499	96.1254411919239	94.71249319893583	92.01655396405087	94.31566978786947	89.02286041825069	89.42653659317672	102.10566835095179	95.91591242230729	96.85637032032909	95.22418333923966	98.30610893132264	94.0172962762298	94.0596634394161	91.13719806967309	92.34383003366331	93.4644056660377	96.88763586230182	91.43278909700855	90.27581094813785	87.45235644018979	91.90095629187257	104.18850932209587	84.3000819955503	80.21982856142165	87.7555623870656	86.70524011485703	95.13431607236902	99.1770936179174	108.33826230075242	101.78467161371995
117.58553153075306	102.67803862735227	111.25642786636968	110.33703613654855	113.81038821429267	119.03582539249255	113.42058975235612	111.02931958697611	106.30910099528539	104.17593545328133	105.72179121363234	108.46598202999063	107.70152779528702	111.45977027571307	106.88082319973394	104.09865529322468	104.53226250977234	102.5952680501209	100.86834654749528	99.10714104084045	99.25940214373443	97.85146623545238	95.14301214871668	97.4384773310885	92.14231162461479	92.55924867103134	105.18607804298415	98.98496518164418	99.94368049996973	98.31652960262403	101.41875552215447	97.11437079813172	97.14517661439037	94.21845823147154	95.40954729871257	96.50700100073416	99.91402452708445	94.42448170447832	93.3085151283663	90.42056608306551	95.00953715012952	107.15251585978093	87.09619639475527	82.98443267159473	90.5271715828993	89.5354995072395	98.0631002004853	102.15380391427135	111.3542811588859	104.66360075787458
129.00838124595992	114.11353770264067	122.67079309678458	121.8014027305418	125.31795768817386	130.35941685715255	124.60717623436868	121.98656603470158	117.46918777859585	115.42783732334259	116.96940422219527	119.69516215395002	119.01376637791127	122.76331335125921	118.32566870235851	115.54652126150278	115.91364394850805	113.86906417489931	112.23795344584519	110.34072119636176	110.542416488785	109.17574831934482	106.3735275650859	108.64319453194881	103.3282590674626	103.83568189095918	116.13787692731883	109.88233728833632	110.93686711400466	109.33863390224738	112.55660674941812	108.16377713008617	108.1309334047555	105.1841147231063	106.29337220678265	107.27452700562552	110.59924531460449	104.95579658707507	104.03237421079194	100.85355215157873	106.12688472376733	117.53912114499651	96.81513539934457	92.59206721892305	100.13599855394175	99.38568937045012	108.30847128836955	112.60513320633667	121.97697834110204	114.68137115310945
131.95010438393706	117.08439226948188	125.6030524307315	124.81604398830407	128.41453858750754	133.1603405398796	127.25124193857303	124.40686265642272	120.09111635769463	118.15255665435848	119.68784866154888	122.39030959081438	121.8080918508802	125.5439936217591	121.30899848017545	118.53662943130637	118.80205302680932	116.6207525291146	115.1127671729519	113.04926546985641	113.30806823618222	111.99340653157141	109.08267671534796	111.32150926302707	105.99226794511729	106.6001523592212	118.559405992237	112.26318996525688	113.40205560339638	111.8325744766159	115.1602454932441	110.68492396268496	110.59274032302908	107.6315421609364	108.6673201186912	109.5498472222656	112.80387135165756	107.05166162002489	106.27748872932548	102.88525796993007	108.71683774547337	119.51004082830353	98.38923017391645	94.11126400560786	101.63563515555602	101.03382730318148	110.19528515817409	114.62998986675957	124.11784124106713	116.40544851855535
132.37059109790437	117.55766693411861	126.01795603082893	125.33647430131963	129.03769543535867	133.4048784179868	127.3134416689422	124.21396511815529	120.13539553061767	118.32115380917185	119.84705398803025	122.51849404002466	122.056450419276	125.77159406852016	121.79320293875048	119.03265176854322	119.16972135317957	116.82369282767203	115.46810694221172	113.20511844189043	113.5321819736807	112.28251868675798	109.24484534527271	111.44377306472354	106.10550281114062	106.83243380366386	118.37493149742961	112.04142887094403	113.27388197966778	111.73939890423257	115.18933412956112	110.6245906619951	110.46471486737036	107.49164877775357	108.44312981362086	109.21501481846572	112.38707923278233	106.52658814969327	105.91466266522157	102.2991344300809	108.73901866396336	118.83551332660825	97.3458892208073	93.02272598576704	100.51363575861492	100.05871156023129	109.44640140975649	114.0184624153659	123.61764246981943	115.48232491970103
122.84504395170384	108.08376671162704	116.49281427113804	115.89286126691567	119.67623421871394	123.75943332141362	117.56715627402578	114.35718413600968	110.38334220657252	108.63840725164195	110.15787296965874	112.81007557881888	112.42008874700765	116.11990953491748	112.32399370058657	109.57522980347662	109.61574584121517	107.16253019814843	105.90845194321474	103.51825383863427	103.88648772373746	102.67996917380609	99.56455150456974	101.73876497328114	96.39919162200461	97.19734595508352	108.52306819714441	102.17835445255602	103.44582794899816	101.92672253729009	105.43215408216845	100.82698539657648	100.63794772539147	97.66140108407998	98.58053025372811	99.31714483660885	102.46765636193047	96.58728065666848	96.01007639732521	92.35174757285999	98.98206475833334	108.87900582818826	87.41188079518436	83.09717427317271	90.59708093047153	90.11390830690625	99.4876488996552	104.06709736170616	113.68010942639101	105.53234711127412
118.30608699292607	103.7299190742938	111.97390776370945	111.58848359934808	115.56013145141546	118.87521169570412	112.36520795447493	108.70413763602649	105.18000127291049	103.67971881147982	105.17325757359758	107.75327538672433	107.59558840846536	111.23710927362691	107.9666390879937	105.2582418403397	105.04070666002679	102.27814542533332	101.33108602270438	98.56355753177628	99.0623428408758	97.99132391158079	94.64637980262398	96.72975856575182	91.40654125664699	92.43293774971974	102.90841983198808	96.52513991266247	97.95657495185449	96.50961692056471	100.22497188490125	95.47677695100768	95.16323344857172	92.18085801503504	92.94068695408977	93.47544440640215	96.46896519775672	90.42722333485874	90.1346413883988	86.10628657538516	93.79789305557296	102.42913629085761	80.45029355842058	76.08082531854315	83.50971082920404	83.24793889039071	92.94680761083477	97.73423945945471	107.50093933634858	98.7042032623746
116.63003983464026	101.85973051944218	110.2774434620965	109.66541727596181	113.44229935129611	117.57587713333659	111.42882169263432	108.30825328496653	104.24810664602859	102.46833687248186	103.99062697006883	106.65169461063564	106.2328589409733	109.93818476760171	106.09952283834872	103.34913816830036	103.40586239042173	100.98378930476912	99.69961002102565	97.34962476442486	97.70192369536969	96.48175590947767	93.39289319547284	95.5781669165378	90.23886480102676	91.00869716787726	102.46866874850998	96.13707472821443	97.36719457876175	95.83435189940904	99.29981308285593	94.72236756379758	94.55808998345852	91.58480694077988	92.53876372663372	93.32594179865647	96.5185668512143	90.69508026390179	90.03112516931316	86.49397372057393	92.84928897994791	103.08042488367353	81.88318330500452	77.60814377419405	85.13522622441928	84.52888455013624	93.73614635801634	98.22821734134723	107.77909809123545	99.90653157443168
114.30311851624144	99.72655224084647	107.9706295626349	107.58534606140655	111.55979849778235	114.88087164461291	108.38733600574668	104.76702659023661	101.20124928427347	99.68716941564527	101.18204156636446	103.76597174172413	103.59824789029261	107.24212758702602	103.96317957499578	101.25513840363028	101.03779997549228	98.2824483786805	97.328097437298	94.57027936889952	95.06431269296694	93.9898349311469	90.65118064016123	92.73870117578247	87.41402986006848	88.4327200129357	98.96575769293628	92.58536008896024	93.99986250751293	92.54595149683246	96.24573021385336	91.50725195695833	91.20452356928047	88.2220045893277	88.99847126577191	89.55854508206627	92.57612946317646	86.55975879867206	86.22141437253023	82.25315598287048	89.81608482584073	98.62458342812455	76.77918612872354	72.42615164170056	79.88392822815494	79.54738499214679	89.1606031849221	93.9027742674704	103.64205901480332	94.9979616128959
131.1872988022768	117.49731247974428	125.06371820071627	125.28333885733187	129.66748486280983	130.72495269503082	123.38720555988235	118.31946686529082	116.40552849950741	115.71197566261097	117.08129498457085	119.36299341231253	119.91576295431418	123.28279290382385	121.60896069098449	119.08308541210471	118.15719987859224	114.57739416623623	114.55020958748108	110.77224058891376	111.64283472406738	110.99995215221632	107.10074710688761	108.83728071578471	103.75970546694079	105.41755385322416	112.8427993396909	106.55451508650017	108.49043389450361	107.33593910229435	111.59784087537142	106.56001545806686	105.84974629306681	102.96561236569649	103.15730897720546	102.96142081664499	105.25877130619055	98.86038333922484	99.6421138576623	94.41371817364556	105.4729059846312	109.2035399045466	85.97454682912642	81.62355754687823	88.23355347447318	89.05968408734054	99.72033267436954	105.17211754348368	115.20069972199722	103.9480301572551
131.7837615900798	117.42217685976286	125.49260830353394	125.29096551485272	129.398603270318	132.02173912649425	125.2017390264787	121.01555537782102	118.0511364472082	116.81828850769911	118.27780497902553	120.7698304643918	120.84886859016487	124.41651699398749	121.63900259011953	118.97439107453847	118.53807833729881	115.49828616520378	114.84321417601205	111.73341696706079	112.35791647185854	111.41967613402169	107.87512416960583	109.85504751811467	104.58116862540126	105.8220206463457	115.3039529613635	108.91408943295828	110.53965504772422	109.18840272944722	113.11956205598645	108.24020332273028	107.78275645980746	104.81474462866261	105.37300744930572	105.63866575270428	108.38821455514284	102.15819238772248	102.27937113519619	97.74755647028692	106.75731770902578	113.58780286980752	90.86906128829324	86.44868275680702	93.6162030716016	93.82492088625278	104.0286862701094	109.12799534534987	119.06830123128113	109.18979146451728
137.45564216391983	124.36631841542186	131.5086386536366	132.0135409130247	136.54157100316402	136.50252598621157	128.86710779470053	123.20418246863119	122.09103867852694	121.79075673823057	123.07956406088815	125.18416761602805	126.06620144855766	129.25398135693922	128.36206264701022	125.95682356398657	124.71021889743508	120.80034200606316	121.2056859683011	117.01638154518517	118.04611420783496	117.61393662867212	113.52493092164211	115.0683749918476	110.2004006772021	112.11813148862394	117.97627823412914	111.85477393183045	113.98995160663183	112.9955349258875	117.43501970235381	112.35528334901025	111.47334467497444	108.6950501479046	108.61716297070845	108.08246351263506	109.99973612581898	103.58213380779306	104.84984079715773	99.19314904263021	111.56569173596758	112.89152063318267	89.70351408208964	85.52486996136015	91.49909842319911	92.82000577463745	103.63032154885151	109.26922041048245	119.21696060714098	107.01119824897887
130.13793029315949	115.38905536046602	123.78637792481115	123.20275310497728	126.99628561919506	131.01309789206306	124.76796273812644	121.45664814569491	117.5815611181977	115.87726632722406	117.39325796795382	120.03479254464844	119.67898007370795	123.37191320989244	119.62977920465053	116.88332182693301	116.90257219860824	114.41174802202427	113.19415031863825	110.75599478754688	111.1429024953977	109.95281386157538	106.80628760993487	108.96741852965992	103.62829098175587	104.45922245163102	115.63015882444498	109.27268876648667	110.58134035060318	109.07797666837268	112.62783993234363	107.99222038941014	107.77555980096486	104.79621618610534	105.67658844644374	106.35741218636505	109.46045014464525	103.52129673955992	103.0384335887473	99.25152108805713	106.17939104643543	115.70382419434428	93.96764431461801	89.61800602951242	97.07758922908062	96.7255542250291	106.26779244914565	110.93876479551976	120.6150568314097	112.17160897852445
133.39281576689893	118.68761312541008	127.04464824585534	126.51714573673642	130.3590514671281	134.16968009255564	127.82432301860739	124.35734637944131	120.63595518724975	119.00743259780697	120.51601986958228	123.1360979486487	122.85009336481542	126.52693933837729	122.9291828777094	120.19196011550774	120.14312870427406	117.56361902001576	116.43262597756872	113.8857555821943	114.31126971602313	113.15928469150263	109.94554639383794	112.0802138920292	106.74417323049678	107.64207251720951	118.54425044262203	112.17223344661427	113.53897515231014	112.06001497832334	115.67983355939008	110.99644998629682	110.73772923565379	107.75584913136719	108.58055089926958	109.18699103268683	112.22891606512592	106.22462506698521	105.85511164567524	101.91973614228729	109.23700461951277	118.27771214990491	96.2971664459032	91.92173235641276	99.33482139828558	99.10363863057792	108.8020647600665	113.56668275730723	123.30818189806784	114.5604942020986
134.3528042919892	119.71999755281092	128.01309511472817	127.56807918745518	131.48088142287003	134.9910150181034	128.51487946834357	124.85185240588876	121.32879540952518	119.80233026077997	121.29984231214088	123.88929546596151	123.69828168880944	127.35064205375288	123.9600801803388	121.2382321628802	121.09052154121706	118.38906859524936	117.37962747234958	114.68395900888069	115.16176636991274	114.06353819706497	110.75981940969825	112.85703433122393	107.52973482068172	108.51798332734857	119.05968854871413	112.67492391662272	114.11297667890696	112.66618242512533	116.37325434571007	111.63188112186099	111.31987246080716	108.33751339784754	109.09196264742339	109.60703904499361	112.57315422469097	106.49839828562156	106.2629081774262	102.15769377361127	109.94314652776457	118.39280517598864	96.1709036650381	91.77465648514644	99.1292968247833	99.02502442588278	108.88181812439097	113.7468250481893	123.55503140986274	114.4767127067755
132.83895083508702	118.25829995580632	126.50683712827143	126.11535716589621	130.07369672208912	133.39062627979393	126.83854949461667	123.06568252231273	119.65636189771756	118.19128384313493	119.68150996401911	122.2516021140856	122.11824004227181	125.75425114471597	122.49566044062774	119.78496990530206	119.57353553994704	116.79719125348986	115.86396477497016	113.0770717624341	113.58665932746666	112.5223705857738	109.16451412414247	111.23803162126586	105.91856356887307	106.96178244615632	117.28708481385996	110.89778530885384	112.37504598616717	110.94712578338537	114.70312434400198	109.93006365481281	109.58773898919657	106.60645619862053	107.32118988037995	107.78619950277412	110.71091752754424	104.60221036609963	104.43697211863102	100.24522280312085	108.28333666518263	116.41351213664235	94.0885681280486	89.6851690568485	97.01130694320403	96.96270210405048	106.88888926119499	111.80077568343246	121.63898699459132	112.40650632870012
131.9881634826742	117.47357398639049	125.66708222119557	125.33789928160282	129.3471802582054	132.43776284748242	125.79679624396145	121.89064889997455	118.6218405551342	117.23105255939736	118.71199748362201	121.2579529534092	121.19335618752439	124.8086502955827	121.7060533966998	119.00936753261247	118.72389191351341	115.86035149134567	115.01742120124315	112.12393012167297	112.67108777633857	111.64736555404896	108.22695740088224	110.27122613495139	104.96364758469072	106.07170201875091	116.13088003938002	109.73843703451773	111.26353467731363	109.85936629852468	113.67332569914208	108.86380782024574	108.48452898139514	105.50590294766766	106.17127107989151	106.57354950265076	109.44475753352872	103.29513654366566	103.21937307869446	98.91907591373071	107.26881400388902	114.99400648752892	92.53858279912365	88.1273261297204	95.41052567071986	95.43896091877026	105.4546163630181	110.42636120894332	120.3002301801902	110.8664339441692
126.4511157201344	111.82765503200862	120.11239447519392	119.67813570856866	123.60434104543229	127.08490962582901	120.61819213166068	116.9935145168838	113.43153766481551	111.8968877776448	113.39491673785105	115.9863027759367	115.79183590272494	119.44443231599472	116.06723222619334	113.34796735688028	113.18819860193739	110.48276914424868	109.47740678149367	106.77831176940308	107.25534042119672	106.15860125278036	102.8536628985524	104.9522855135706	99.62445304340342	100.61204885654766	111.19541217337947	104.81337284205159	106.23477750086745	104.78156882717867	108.4757070918355	103.74215219780245	103.43978466422699	100.45727790906352	101.22781439071646	101.7693485003774	104.76245338628341	98.71550499460095	98.42883595022273	94.39009288335224	102.0438743250817	110.68905886125567	88.6178651986632	84.23627930260189	91.63645358844052	91.43863770410631	101.19673256730599	106.00847356412571	115.78602088763873	106.89573216902168
127.15467307337525	112.59398364203388	120.82545982894122	120.45394705048463	124.43164754314515	127.68321114968158	121.11987681273239	117.34712757077803	113.93816228193208	112.48222084323616	113.97101583653084	116.53776635686259	116.4157583586757	120.04792263817752	116.82988532896779	114.12391004916658	113.88905584389822	111.09220016691755	110.18018545414853	107.36903151646017	107.88578813232401	106.83083531015018	103.45911073755624	105.52770625870615	100.20996882486408	101.26630328709493	111.56730654128205	105.17829008958758	106.6538415918264	105.22607905063457	108.98524310329105	104.20970960920285	103.86651581431381	100.88523906352685	101.60118960165669	102.07197869155422	105.0053830787967	98.90635312792196	98.72354376519947	94.55488268903049	102.56677137689753	110.7538804205568	88.50037628161786	84.10326013462239	91.4566549888062	91.35782334601097	101.23663016280213	106.12454739948868	115.95060800985657	106.80829336765704
127.63119930977881	113.51041851432512	121.39446757698396	121.36338759709302	125.5934535241311	127.59390494694105	120.5618563663027	116.03973179010596	113.45941963978645	112.43166721011731	113.85957889548251	116.27599528018588	116.53975394946605	120.03671971846855	117.69414582503835	115.08020491362518	114.44347919769903	111.18106437316987	110.77487941820459	107.39048575080155	108.11387014112329	107.29112005662408	103.59497999745564	105.48472938294661	100.27243252474369	101.68336820785328	110.40057169407152	104.03133242846073	105.77646147408262	104.49533659752221	108.56285867229361	103.60966523443922	103.05539107655977	100.11013365348612	100.53314876597562	100.63059022425917	103.22602433434903	96.9186191557321	97.27556191832366	92.48114359438844	102.27422594607457	108.00864680020184	85.05809813059102	80.64269243433591	87.66217655317922	88.06564766800737	98.45015507557736	103.68141650813267	113.67535478404979	103.32346244978578
119.13689093600107	105.10477153564055	112.92036904643602	112.94614616607676	117.21732752178055	119.02473640132997	111.94868297079552	107.37667798398878	104.85835620906019	103.8793388203566	105.29846465060675	107.6955152191076	108.00600774801015	111.48252976799175	109.27350869584906	106.67958169635843	105.97495192966342	102.64801297383417	102.3175490124044	98.85260949336173	99.60360449606219	98.81691882164321	95.077285199269	96.94059617301987	91.74891428160697	93.21052681625693	101.7470528860268	95.38205870100666	97.14529305135426	95.87731809405804	99.97134850634053	95.00445809942659	94.43150860498068	91.49166116253544	91.89116219603098	91.9667107854915	94.54937171274706	88.23899133748019	88.61281989572866	83.80094629066353	93.70304122073726	99.34014672185171	76.41972977971008	72.00211484011902	79.058349342395	79.41842106213484	89.78052625933168	95.00296456055817	104.99533880449933	94.70115942584962
121.43464052930314	107.2119436316317	115.17287779485494	115.07384896515946	119.26026049621646	121.52366033978815	114.59910591500909	110.27394599444533	107.4683256201484	106.33618273801616	107.77999900107561	110.23500362765004	110.40918599377393	113.9407397227363	111.40988928079693	108.77575254039684	108.21784670605014	105.05218900787062	104.53690875457897	101.27207587505042	101.95022712196987	101.07673502202275	97.44565614495116	99.3785005766871	94.13467487566231	95.470617089573	104.58749947115389	98.20328295458089	99.87776554687711	98.55614916974162	102.55138507918107	97.63556533485229	97.13499463868853	94.17554521210589	94.6776202781153	94.88056334883157	97.58112798201773	91.32705202553589	91.52144863228885	86.90782096930668	96.22208426268547	102.68798949930968	79.94660666865958	75.52616342826073	82.6953599374055	82.9046597551502	93.12748221580385	98.25013689156681	108.20366128060017	98.26681239868171
123.91164448647173	109.81377823125919	117.67985323807986	117.6638691819636	121.90560222552779	123.85740234550701	116.81777175398953	112.29330907197661	109.71706048445627	108.69840305945367	110.12451623460585	112.53719402158133	112.81061891933304	116.30318678426326	113.99356264234227	111.38502379006007	110.73008746674004	107.4519754450252	107.06425584527459	103.66024028104336	104.38996746160886	103.57604217891041	99.86920830523195	101.75307715070122	96.54522548218097	97.9684230512608	106.65349818791213	100.28422289958313	102.03026975626622	100.75052806213107	104.82201161994507	99.86658714808128	99.30989832410376	96.36524013099519	96.78622139809266	96.88431406237858	99.48378597461742	93.17920885292017	93.52914542799046	88.74267996465537	98.53697889026411	104.2957273917878	81.37085555537445	76.95373142413264	83.99909822400069	84.37161763649057	94.73604472735362	99.95575380288689	109.94641974263783	99.64808366316274
127.32799160862282	113.0267604567618	121.04937642275232	120.89367535113087	125.03703706203328	127.49827882870578	120.62962331932613	116.37776813850135	113.48766646663411	112.3007493428934	113.75327417571306	116.22862371686968	116.35099527828615	119.90260136733934	117.23583093945794	114.58438476953825	114.09372869885162	110.99691826022699	110.40456750771293	107.22471477892545	107.87347901320787	106.96413965433261	103.38028789554227	105.33924503885879	100.07821627158474	101.36181773025712	110.6779182877216	104.2903746115801	105.93898906754684	104.60139715230328	108.56239873167054	103.66585629351611	103.18845385313722	100.22416136684068	100.75632060896324	100.99226428018034	103.71806883281498	97.47583242768883	97.63288197917797	93.06071328906651	102.21454939644303	108.8686017142834	86.1328714341062	81.71238992153756	88.87631822405343	89.09132818143587	99.30857982530208	104.42134399725812	114.36893808838371	104.45241393199316
129.54599150405926	115.3639983537472	123.29489697226698	123.22307161403074	127.42463603591004	129.57247024145184	122.58672587869026	118.13682543402183	115.4718277264363	114.39711059419285	115.83268032835102	118.26699008618782	118.48838679439815	122.0025698527883	119.55696444661685	116.9300201847927	116.34115583276589	113.13009298887847	112.66519097651181	109.34434446974683	110.04488948394764	109.19462884181839	105.53297131435258	107.44433591405912	102.21594107215164	103.58730887201132	112.48089073423425	106.10556431890534	107.82501558277512	106.52798345382037	110.5660575810999	105.62805992619856	105.09524088480762	102.14401966770075	102.59703604849558	102.73084710208293	105.3593818710826	99.06633202559283	99.37394300694187	94.63311804835004	104.25875624035334	110.22589765989557	87.31346647832211	82.89599662002264	89.94335317133765	90.31234851090461	100.66543035901492	105.87228738682181	115.85760190915633	105.59227984697975
131.55189705123564	117.15475158616054	125.25332749526642	125.02374649093512	129.11055423135412	131.83674643504213	125.05590745713943	120.93262251725379	117.898760296962	116.63039022805653	118.09491513970829	120.59936776826169	120.64643265925672	124.22518710351268	121.37564445064706	118.70363236867561	118.3002552560196	115.29889909999656	114.60223893185746	111.53970002549548	112.14715137201351	111.1898677740124	107.67210018845626	109.66669981872174	104.38429459040421	105.59599735628099	115.2091227144572	108.8175456001811	110.4205685339921	109.05708959961486	112.96256113586593	108.09802247891447	107.65814634892644	104.68714521921825	105.26983396674729	105.56678029216961	108.34488327166197	102.13226113928579	102.20797154857131	97.72869866942676	106.58966384768554	113.62705221011048	90.96636848864942	86.54699514655529	93.74431020424876	93.90964614720892	104.07087237731064	109.14110582614222	119.06751063165206	109.29266466489493
134.89524649868014	120.49623623305018	128.59658322649682	128.36521473409027	132.44916630611638	135.17709074915058	128.38895977921715	124.24514947440456	121.23326854032203	119.97103430981939	121.43491320980377	123.93745847190488	123.98859035588012	127.56627211168404	124.71751060379285	122.04474426761884	121.64354760194561	118.64077264871037	117.94546390087642	114.88099190996454	115.48987445935765	114.533212899547	111.01425856662921	113.00736188061097	107.72587783672378	108.93929557205217	118.52628775142435	112.13527862243228	113.74608222157941	112.386220306513	116.2980277282464	111.43003013176511	110.98531955927906	108.01516415172047	108.58994601313834	108.87440609780383	111.63885760422589	105.41673199011338	105.51533200776507	101.00904180658652	109.9271577918979	116.86922854896387	94.16100786912513	89.7407012946019	96.91021913683046	97.11531840766933	107.3107675612188	112.40161848665507	122.33717307592555	112.48240217122363
133.54136311331408	119.31479403070249	127.28036961511883	127.1776243478954	131.35603026939023	133.61152396706674	126.65442495705139	122.24150187166936	119.53272689192836	118.42880808127511	119.86923727080439	122.31470568710645	122.50849297471807	126.03389121695704	123.51440315098165	120.87764530593418	120.32536002354243	117.15097795232253	116.6443897586277	113.36886304377433	114.05374017378432	113.1839850812592	109.54717136735589	111.47287166014249	106.23431053635946	107.5777448704019	116.5781577510189	110.2002499261871	111.90664468097951	110.60109237490562	114.62183458208911	109.69318091406896	109.17239738068449	106.21813968584077	106.68686202707913	106.83751300437532	109.47884608837478	103.19073564474884	103.4799666383068	98.75894606853974	108.30363989147766	114.36439345602504	91.45156238678119	87.03428626647755	94.07652323772857	94.4512067349491	104.80379971183503	110.00731164358916	119.99081345054324	109.72845666349063
129.16814252604152	115.24465837667826	122.98138425694944	123.07167779730922	127.37956734526345	128.9256995368297	121.74070074667864	116.95202385718748	114.68996728419111	113.82261040954869	115.22356632600273	117.57717312646146	117.98076287359348	121.41798493253454	119.39700176937227	116.8235751351092	116.04606329675595	112.6269088893896	112.40394579360262	108.82543274471438	109.62087013478647	108.88448880821393	105.08589385159522	106.90349163817285	101.75051927780625	103.2829858026963	111.38526212051889	105.04781961629922	106.88695510290013	105.66545540241106	109.83134608685255	104.8317546542129	104.20148629447493	101.28211791971476	101.59399395175633	101.55019719518044	104.00559092281738	97.64603202800657	98.2078685328673	93.1974545519032	103.61483956957956	108.39276094685526	85.27426898330127	80.88045992457221	87.71873539343596	88.32458559607498	98.85784978438217	104.20165610053171	114.22368588820498	103.42984360911238
123.5978427978476	110.02364562509588	117.50436256573633	117.78404306747518	122.20393426896895	123.05294930322047	115.66998257455019	110.53578381471297	108.71187861454999	108.0787871575704	109.43567205932426	111.69101984392366	112.29786958892556	115.63680158269614	114.11210547968179	111.61178613644995	110.6147981479876	106.96853990276617	107.0264835586582	103.16421841861978	104.06531526310046	103.46440815726336	99.52334593190423	101.22530553848048	96.18239619304968	97.89532248033082	105.08004958891435	98.80589027587331	100.76676734442687	99.6324948453996	103.92303863146323	98.87520822832742	98.1403270815184	95.26848876688571	95.42496585121818	95.19166565324505	97.45746749145465	91.05447266994841	91.87890104435539	86.60947988327013	97.83400788839653	101.3584016831052	78.12818837048259	73.77796550152996	80.39162573405879	81.21362670504753	91.87770377392711	97.33583906672881	107.36387153451503	96.1073434206223
126.22508188048339	113.10438421485635	120.26439784444969	120.75600020882746	125.28050103166387	125.31995532667979	117.7194049661171	112.14974961723226	110.91246585208664	110.57062402992632	111.86740591821857	113.99137596215957	114.84154386704891	118.04709826557745	117.10331567800446	114.6949293116893	113.45864615222294	109.56799648010244	109.94913849854282	105.7810973414316	106.80079788406573	106.35828939268045	102.2771095127751	103.83330197639647	98.95072331448628	100.85862931328971	106.87404288632523	100.72138221170052	102.83001735415631	101.81457266948159	106.23649230058547	101.15838278774564	100.29572882219937	97.50310040378322	97.45849106542303	96.973542514191	98.95996440081053	92.53863531448877	93.7241380642302	88.13327971066361	100.33985935273219	102.09859659738854	78.85977651296348	74.62858387073611	80.78677273161757	81.97472884905022	92.76619006433617	98.36738797225979	108.34704766783892	96.39048182653207
133.93346322011948	119.90306915651468	127.7201503687674	127.74590604130252	132.01105576862483	133.78879906442288	126.66859300262024	121.9808041465653	119.59468842003297	118.65563080151325	120.0693573575858	122.45180534193686	122.79105192808716	126.25708964794156	124.07351789601799	121.47723047686266	120.77534859243481	117.43371963615964	117.11859166310607	113.63655225605063	114.39719143707488	113.61694409909195	109.86900093168784	111.72180948539382	106.53898884295499	108.01078400113606	116.386819872425	110.03601029876576	111.83927397739548	110.59332772087082	114.71859845183913	109.7376806908059	109.13879556773507	106.2080221823819	106.56435505723766	106.57276727885439	109.07605072895797	102.73126476072666	103.2249788695011	98.28480038869397	108.46844894358614	113.5736840867538	90.48607895892559	86.0865434079965	92.96029928668685	93.52851489487426	104.03117661926574	109.34794648018539	119.36456762033185	108.66612056135169
137.8119167086839	123.7286389191896	131.58595282048708	131.57828075379192	135.82008861046873	137.71572228159195	130.62670979070305	125.98328822224994	123.54282732081363	122.56980329799396	123.98951984827536	126.38548369431341	126.69351946330585	130.1732241497921	127.90774953610146	125.29998505882224	124.63744095846666	121.3352593448869	120.97386360849546	117.54080742787134	118.28413548166041	117.48197717140184	113.76013247311762	115.62989158995752	110.43340277932155	111.87462295320914	120.37835528060667	114.02241847060289	115.80987904247948	114.55312147451357	118.65917580382934	113.68757081727225	113.10301339052134	110.16747797124522	110.5434456414529	110.57384928831598	113.09580927602757	106.75690893681578	107.22413170600217	102.31150168582185	112.39404195336458	117.62923322852524	94.54868391329454	90.14818811782749	97.02656010164971	97.58961447441898	108.08496900339726	113.39387917686797	123.40851822629854	112.73191761830219
135.14014315601165	121.2931180886929	128.9747690957842	129.10858862155425	133.44113494215688	134.8128381726833	127.56169418626818	122.64223262849566	120.53906523730457	119.74243674167546	121.13126666795866	123.45636806956787	123.9191883843702	127.32990811031465	125.43332305851838	122.8744977974312	122.04804435126943	118.56996313430916	118.41711164206784	114.76612394140604	115.58973034552311	114.88631473281224	111.05095742339493	112.83870103230421	107.71254657817154	109.28991780527316	117.11739301038178	110.80112102480618	112.6849890681386	111.49265541080868	115.70057138978375	110.68348595040473	110.01852580280989	107.11355730053846	107.3722097904515	107.25705430763519	109.63471384204303	103.25286043907808	103.92459133864512	98.80346208003034	109.5195348806975	113.78007901881712	90.58636168937262	86.21592707356521	92.9168955849626	93.65918388700746	104.27203769943772	109.6792903728556	119.70809646755914	108.63641989855464
135.46636243743419	121.78225034621038	129.34544470339117	129.56794096938967	133.9524383780289	134.99028515493617	127.63920615386476	122.53780386808914	120.66493082081274	119.98481930975706	121.35195744899536	123.62812402735582	124.19107665511345	127.55350622004902	125.89360054726417	123.36803592726777	122.43999063994274	118.8538653163251	118.8339283629642	115.04874658569712	115.92282023981144	115.28305223691358	111.38066211610567	113.1132118688791	108.03956384326906	109.70124387900165	117.07432390995223	110.79322602323546	112.73977895839231	111.59219601284354	115.86212215284738	110.821628316096	110.10404625016761	107.2236767273226	107.40313280356527	107.18873272300277	109.46265092417032	103.05981178588631	103.87315258052885	98.61479181570725	109.7445310811839	113.3228722948517	90.07978503892981	85.74104190207859	92.29288047721694	93.17099626934836	103.85428592084305	109.3260579911064	119.35295254207468	107.99952517927541
135.02350239687664	121.56496319641212	128.96634902977672	129.30262954335365	133.7492502974058	134.35806018202067	126.88835213427753	121.5636798700048	119.98413241190273	119.4532682020047	120.79090451342815	123.00180035317075	123.69170992792363	126.98838238603327	125.63386687341138	123.15437195173813	122.09670366796118	118.37690687219809	118.52746292273216	114.57560028918748	115.51299867837588	114.95585733443394	110.97341961395874	112.6326124557752	107.6343574816601	109.4015033367969	116.18470176111605	109.95733856554553	111.98015640609806	110.89108473512248	115.23335628519864	110.17076494143105	109.38751153723396	106.54314059073864	106.62187580390116	106.28247462175133	108.42220147550903	102.00392091285082	102.99397172662901	97.57283599755371	109.20602455430083	111.92123957932083	88.6592460747642	84.37054540857154	90.7219874191168	91.76636878443247	102.51646196129246	108.05944526769386	118.06966330582226	106.38421688931894
136.87938197289387	123.60593320736551	130.87695488234505	131.30012174655093	135.7900180177542	136.06455695839122	128.50566047733892	123.00136836087935	121.66538400297158	121.25415551368187	122.56704258764287	124.72364911234888	125.51356562148705	128.755094098976	127.63888588428918	125.1965324701496	124.04136187522843	120.22184327982617	120.5039372739862	116.42777178247817	117.41334221569305	116.92038051780581	112.8810844208886	114.48124892210414	109.54780622613511	111.39349013774768	117.69925541081122	111.52418560553198	113.60687527067626	112.56665649514552	116.96175391625066	111.88768831514895	111.05256793015836	108.24108611016538	108.2380798383073	107.79612356012349	109.82002416703513	103.39816706606399	104.53495614457866	98.98626368635314	111.01347845619942	112.99895911124129	89.75989070484567	85.52576760424776	91.68163766727888	92.87472700754248	103.66495308670999	109.26241398659856	119.2448563754852	107.27495996738067
131.97271437199606	118.78683394566103	125.99471681955004	126.45746272061328	130.96732390623617	131.10221534777446	123.51594857559813	117.96470136202637	116.69732766505145	116.32921850065864	117.6323548622678	119.76879466014141	120.59577405563746	123.81550294177637	122.80085360335951	120.37753256783185	119.1760740201301	115.31467155340565	115.65442627273475	111.52464254178484	112.53031743145438	112.06642670881438	108.00272016560432	109.57724886605574	104.6731665618898	106.55452733965986	112.68237467045215	106.52290994308288	108.62304503994045	107.59883450496389	112.0110094142566	106.93421239505194	106.08164979967479	103.28201793656477	103.25229158107436	102.78096674139586	104.77647600249605	98.35500476244546	99.52799776543834	93.94830682136187	106.09398097688118	107.9054615775996	84.6708479575706	80.44399622975948	86.58062520899158	87.78615818253766	98.57989059851617	104.18396493596344	114.1617167366004	102.1704689712609
131.0970552189591	118.19381762320697	125.20446948297507	125.78798928265589	130.3513392024837	130.0261400932095	122.3340837627935	116.56001825628934	115.61238025243478	115.40629909187922	116.67318113097359	118.73231257269107	119.6931518333402	122.83210590150794	122.14877180590014	119.7829785964023	118.44609206083513	114.45416786195997	114.97646643987117	110.68230557724061	111.75249719017889	111.37956576728342	107.24566874470666	108.73448213922684	103.9326062919396	105.91989281233592	111.38623295209581	105.3079754381222	107.48235058882068	106.52549234861266	110.99880721336415	105.91795493362949	104.9977815971481	102.24909964443755	102.11020239936781	101.50521197257959	103.34689180224886	96.93604698923991	98.29610307761745	92.56572456583068	105.2028821485213	106.07352249110596	82.92218059061457	78.77704322688646	84.65518580343272	86.03761853315883	96.85281694973725	102.5115771503704	112.43666143284752	100.12789000695382
121.11794189304571	108.4056721365491	115.27959289383288	115.93997916075504	120.53588824971261	119.9438399887797	112.20824472512841	106.35504754462757	105.5335266989346	105.41125854646239	106.65737630602452	108.67514830813454	109.70630186441134	112.79945666851782	112.31566547385795	109.99210700376327	108.56466076233497	104.49561292108382	105.13274839259653	100.73788208134312	101.84679186875886	101.53363741256216	97.35791581947448	98.79164796053482	94.05944869645211	96.1165312303048	101.22015247002042	95.17720973791812	97.38267461685278	96.45835996405299	100.95915153410817	95.8801648428379	94.9266557907277	92.20579073413094	92.01365814706173	91.35209993538277	93.13914540704866	86.73455264935703	88.16284259455071	82.37872076352318	95.23483204549815	95.7883369852392	72.64924992940503	68.51956499090252	74.36655535518385	75.7639452205405	86.57994314881233	92.24613210803845	102.16171704387712	89.84120559247114
128.66192942529196	116.23072978833714	122.91626725907459	123.68341532126087	128.3160905578662	127.28846508425727	119.4567339929772	113.36221030728295	112.9034033581077	112.94571206146438	114.15284179905352	116.08719138237204	117.249572010553	120.25547231491478	120.08192049768473	117.81225272363116	116.27133291528216	112.09254621955752	112.89359566486972	108.36226398684063	109.52763054742825	109.29613576301553	105.07030341363269	106.42125657139881	101.7966255109893	103.9388935239997	108.36996852264699	102.43803303018431	104.71730861926937	103.86721462454152	108.41708350717285	103.34957553995659	102.32953311742753	99.67056949192175	99.36488802106193	98.55804279566502	100.1576766266934	93.79046505009995	95.4302381985807	89.49695205328177	102.82962108820807	102.26614003260984	79.34685868238142	75.35398886279845	80.80009298876622	82.4443671783067	93.23911544994968	98.95752420483308	108.76886838776123	96.02604754521424
129.23247087275865	117.41663339361568	123.68752366130025	124.66813375182008	129.36186838355044	127.49760016146408	119.52923311754225	113.0636946901531	113.217118608658	113.56074040221877	114.68929411217877	116.46202873268733	117.8624113864407	120.6928492227135	121.1276542028368	118.98127615341564	117.20919700742733	112.83093359568883	113.95737083963114	109.17171034780407	110.44319768224062	110.37955920840648	106.07140994022353	107.25060029859866	102.86552940971872	105.1747495884419	108.32871579567994	102.61659146521879	105.01057494673528	104.29682037741352	108.91156062352464	103.89195237579173	102.75712388470599	100.22576295450534	99.71855739826664	98.66748463017338	99.95074854656028	93.68648128085309	95.66430563637773	89.52628932246083	103.6103693089999	101.23866761202328	78.82382406981623	75.07850464614647	79.88684512217644	81.86418727466189	92.53386691495359	98.28791764657835	107.88731984497791	94.64165503130573
134.13625001495092	121.54928885529444	128.3438093961418	129.05250206295648	133.6639805791345	132.84798413856572	125.05033858218921	119.03048653229573	118.45013091678429	118.42167236177694	119.64687191403527	121.61754489313714	122.72226208313901	125.76808104516552	125.43710040702028	123.13413123399262	121.66019477073029	117.5382991178454	118.25087852312477	113.79345169081085	114.92944376908771	114.6518352344547	110.45391416219088	111.84935825199474	107.16556322410047	109.25723343442165	113.99420971683594	108.02307333208748	110.27572889564767	109.39597834910234	113.92633957732978	108.8525860770486	107.86032445065347	105.17458253766635	104.91537935641288	104.16095470355366	105.81916183501346	99.43904405232763	101.0107318006645	95.12507463384348	108.27438022070518	108.04645373581808	85.07835490042137	81.05279360735099	86.58040033378843	88.1808795794849	98.98414410856628	104.69375034459223	114.52830333751612	101.84476465211435
144.9545149960082	132.25640495582036	139.13144141271218	139.7970193905091	144.39082786114696	143.7160985807285	135.9351451408192	129.9402406416987	129.31310448689533	129.24361678389357	130.47981322861074	132.47132289110925	133.54133804387067	136.61120370995226	136.17189126132072	133.84337526388614	132.4215131562808	128.3407374489389	128.98945219951764	124.58691777605632	125.70203067822706	125.39037892292717	121.21468628575631	122.64121614439625	117.91668528684968	119.96885200930957	124.89169375507223	118.9055952875587	121.1456226351101	120.25061190195181	124.76927702187467	119.69278466017948	118.71629816513251	116.01607359826627	115.7820491483605	115.05125132999537	116.72780037913115	110.34477419408131	111.89203322068728	106.02509844770157	119.07838295588171	118.94643269954267	95.99245357412109	91.9675225077614	97.48004915613384	99.0943983918617	109.89639099044807	115.60749387765223	125.43712056421316	112.7116375084347
138.36257283156	125.87061140696834	132.60231236462926	133.34682902477965	137.9703942843467	137.00460250149072	129.17421473840577	123.06944680916773	122.61804006946309	122.64630420131398	123.85801813671196	125.79958789488717	126.9494281148349	129.96481036527007	129.7390961120838	127.4538383197622	125.94258951930263	121.784212068021	122.5513124980103	118.04892846336553	119.20363920344928	118.95293298248133	114.73879753347215	116.10675536523995	111.45872778113718	113.57784964967999	118.08585334752027	112.1554179025322	114.43309105983771	113.57907670855697	118.12544073779152	113.05644027525288	112.04168782846588	109.37752170167109	109.07973348779159	108.27541260554315	109.8672448406413	103.50311619182432	105.14743423626399	99.21275521038078	112.52052939132237	111.8973808729982	89.02743297624464	85.05272130095726	90.43520322166627	92.12102937874698	102.90784952162079	108.63240807981886	118.422891699283	105.5923808545796
136.01721220582974	125.59786855252484	130.95560065612875	132.34565406331677	137.09508770391648	133.5701413471498	125.4467506509003	118.32861500018599	119.73949078459185	120.68268862747092	121.63398259809763	123.04992465217269	124.90569776036101	127.3363853359611	128.97759750658042	127.10520356861136	124.9085703970338	120.21121792370847	121.95754824413227	116.75971817319986	118.21578143393698	118.48057597443052	114.09374250177532	114.9147095445155	111.08357908187794	113.66707297729019	114.22250556739026	109.08273819453548	111.6553128840505	111.23037503394693	115.87991817151044	111.05875429225073	109.72025202022655	107.4992731568729	106.60366987488867	105.0873372836505	105.69330640059188	99.80384092524449	102.41069418342889	96.03335992827608	111.2531389407047	105.2182469637377	84.58323375140365	81.49542927227262	84.79402636954951	87.3879412736735	97.44003194492443	103.10800612405806	112.02351518742002	98.02531780672354
136.60987683694827	124.7312364621857	131.0486845939384	132.00867955233394	136.6967288444772	134.89207345441918	126.92651009702651	120.46113561312004	120.6063984548536	120.93239909411918	122.06663387845344	123.84889423077087	125.23506581203954	128.0770549907805	128.4605027980245	126.29853520556759	124.55288640422002	120.19258241167655	121.28607013801242	116.52601943789965	117.78734179123771	117.70475556089028	113.40481591067822	114.60246596521421	110.18976793424206	112.47826836623501	115.72712695562434	110.009782471526	112.39962997678506	111.67880163890746	116.29052160165425	111.26669141636178	110.13891631812001	107.59870345192171	107.1038121908461	106.06235576699282	107.34959967565185	101.08495996002827	103.0544055782947	96.92221924071985	110.9657464214166	108.60055942057225	86.2197997698861	82.47738013054827	87.2654989186	89.2580439917385	99.92030405852668	105.67484640678038	115.25893738820078	101.96959691557596
139.53411713546183	127.99888217266013	134.08967060342218	135.16004080936892	139.87246228411402	137.62289408311915	129.59863716850407	122.94271875908427	123.42458497449259	123.91076692347495	125.00084134398165	126.69264582466155	128.20320891604223	130.9455689581839	131.64956642518604	129.5548123502093	127.6930866824166	123.23749198178506	124.49752907185487	119.61604108566966	120.92958166550643	120.93337982759576	116.60060191432558	117.70717807621138	113.42742851736584	115.79502324587348	118.36454996780002	112.78300244645624	115.22764865043281	114.58139528109304	119.21573481148874	114.22990843855025	113.04463179986575	110.57860611515402	109.97908480027289	108.81048459927335	109.92139151434615	103.73498144379508	105.87892508229105	99.6597835786404	114.05403074054776	110.70308832626901	88.70957105255997	85.12151218394199	89.53357749021083	91.700164099122	102.2424846176438	107.9941594837078	117.42293303642522	103.88984145647252
145.8767741276295	134.0239199328128	140.32918529256872	141.29773508969333	145.98713903252357	144.12484755554917	136.1453394730681	129.628974010462	129.85450176322317	130.20514444824505	131.33363460404593	133.10193015774922	134.50690550624498	137.3347082125253	137.75126196364576	135.59109895534786	133.84100029313905	129.47273534700923	130.57747748852097	125.81004989679876	127.07526895691082	126.99660775979716	122.6953805097449	123.8875597440514	119.48169195973081	121.77099773015823	124.93590149920884	119.24770674519094	121.64837112433091	120.93994577275558	125.55562076225247	120.53649871050673	119.40033740536269	116.87025752679804	116.35993458602596	115.29442280667232	116.53988504268482	110.29372068880782	112.30096581722263	106.15008316815943	120.24923291305224	117.63268061725684	95.38051219474681	91.67904995688208	96.35336451850698	98.4054251373795	109.03212125376481	114.78744081782227	124.31732045648232	110.92091248188078
151.01826459215886	139.06899524178928	145.44101709244063	146.37749502640023	151.05834034407152	149.31084381904245	141.34406711352418	134.86164138621086	135.02367736085756	135.3358060499889	136.47523233722526	138.2647885441349	139.6393003822048	142.49111402855235	142.82037025070701	140.63942185134405	138.92596521371442	134.5859225876438	135.6416348764115	130.91167876244054	132.1614928301562	132.0564929018197	127.76689286784475	128.98557113650696	124.54134857733426	126.80405363725903	130.14256623034612	124.42846235879018	126.8168347906284	126.09140831560747	130.70062567021705	125.67324692784024	124.55140404431843	122.00374410921391	121.51882045092961	120.48109448108036	121.75923854727061	115.50021156595842	117.47214462200321	111.34069600587782	125.35294095925386	122.91164588912518	100.61584233720458	96.89027897363633	101.61711676605589	103.64719065442422	114.28858189537168	120.04383660837588	129.59040109634898	116.21301376771821
146.57108113353274	135.44092596293294	141.26925145548753	142.46208943208543	147.19462834900744	144.4372542891895	136.3593592817673	129.49144241084016	130.3694390175613	131.03811575177258	132.07573418269465	133.66015280822063	135.31052690555785	137.93330533741025	138.99916890464593	136.98188089056313	134.99511453831033	130.44130122950315	131.88402225182662	126.87760393495148	128.24645068441077	128.34520546745267	123.98503722263943	124.9890320520334	120.86404102008157	123.31207840291745	125.1103322598	119.70155052205163	122.20294199024232	121.64343605122185	126.29268040955296	121.36138870573313	120.11400858735065	117.73779394071786	117.02184773228817	115.7111037236346	116.61332807795576	110.53783910808802	112.87552144223692	106.57706481715712	121.32564493007696	116.8251495332628	95.38603820473105	91.99199162795388	95.94557410682656	98.30726221366534	108.66353920060052	114.39099757907864	123.59923285552782	109.81059418230468
141.4177640054613	130.34211904906988	136.13144402026725	137.34008253763992	142.07490068358717	139.2676994489389	131.18744793963057	124.31241669797878	125.20978130856673	125.89561082855901	126.92756072586512	128.50199517497754	130.16532047737994	132.77642684132763	133.8846777893531	131.8802297444082	129.87417549166742	125.30786986179393	126.77650345022296	121.7522912489827	123.12877823657627	123.24252824693659	118.87867977394761	119.86687035105575	115.76719550760791	118.22953587055184	119.93841396873768	114.54099931116848	117.04669783255609	116.49533645171228	121.14544781647986	116.22074624330287	114.96687668694037	112.60097615202041	111.87251745415998	110.54967424131027	111.43953514193412	105.37038997734649	107.72245822634282	101.41820508829014	116.20271622827293	111.64778587282763	90.21359401325084	86.83213942217958	90.76538768069861	93.13160248789275	103.4831259867989	109.21033602881356	118.42079225691575	104.64029299609213
142.89386284803112	132.0870093498919	137.70172956646053	138.98684430561033	143.72990645742493	140.6105271200633	132.5069419582294	125.51546349819662	126.64739449992206	127.44482651426652	128.44290612843696	129.94938859939748	131.696958552554	134.2312684497565	135.56562110837461	133.61362042391988	131.5289985225184	126.90575787395957	128.48935222831167	123.3912712906274	124.80126680057414	124.97617572092095	120.60029649688975	121.52127523417388	117.52707360796691	120.03879655387044	121.26323284270228	115.97738118851937	118.51390226192935	118.01662291221643	122.66945417667483	117.78551859449206	116.49495122304162	114.18849584950455	113.3889376554433	111.9814856543776	112.74518449444638	106.75234519841496	109.2173932206593	102.87643217800692	117.85572885859094	112.62603954139186	91.55302584214905	88.2957641409839	91.94983440386403	94.42322322947008	104.64502599842338	110.34805938052814	119.41908607753211	105.51921456710728
149.10071301571045	138.14914794049852	143.86225985314357	145.10670178987885	149.84555609188973	146.87417466918012	138.77891148588176	131.82794149606553	132.87010750929653	133.61504312578316	134.62987787183798	136.16809799822835	137.87632340768124	140.4470535421549	141.66590713483725	139.6828702646478	137.64370769278366	133.0509119289215	134.5704115263985	129.5139383972421	130.90535894585122	131.04447230961406	126.67535230373333	127.63519761278273	123.57857960223087	126.0593431591172	127.53197840869636	122.1993843716258	124.72237491252672	124.19954044475169	128.8516002993705	123.94679058893908	122.67437028727818	120.33760398364193	119.57361536418551	118.2049665836664	119.02016874708598	112.99632898742576	115.41173993651219	109.08675231348762	123.97000755654375	118.99867727107987	97.81145058088617	94.50078121784303	98.26358088468292	100.70048894166754	110.96799380759367	116.67910745165885	125.78785354079729	111.91107665360832
153.96010084860885	143.4285910127177	148.87187075803794	150.2325152635889	154.98061022093927	151.52658731866694	143.403269264705	136.2773195786069	137.68556524625546	138.6015166736102	139.5633903124713	140.9951242872302	142.83174584872467	145.28128262260824	146.8462648397859	144.94393225360756	142.78754058577732	138.11220979373968	139.80435097948404	134.6408414491691	136.08156544796952	136.31240616465706	131.9289493729471	132.7871273412447	128.89180811200288	131.4436421714199	132.17876224842908	127.02594190420712	129.59298533091427	129.15343373776767	133.80440950332698	128.96706496118523	127.64039413512414	125.3963619000955	124.52574450643385	123.03001075276035	123.64965932348693	117.75308244231913	120.33682549806099	113.9658371359253	129.12339825033757	123.11201563564495	102.53306965117551	99.41529312159393	102.74856136658885	105.34315370832647	115.38851621297809	121.05033515589503	129.92009190366036	115.88132591037593
159.8881297776887	149.48898224857797	154.8504088611237	156.24635831095512	160.99581150107468	157.3841997492579	149.2545910161076	142.068731682287	143.6055936274663	144.5766169944312	145.52126621058844	146.91752117385943	148.7953223374706	151.20426111147185	152.8773308658404	150.99873279302906	148.80916115007722	144.11068943483423	145.85307829790432	140.66037162906446	142.11500579453352	142.37181628474477	137.98587268831108	138.81472632788544	134.9661362996384	137.53593048351374	138.04386359939193	132.95497831489547	135.53509440481855	135.12242109463284	139.7709154323834	134.95679919868812	133.61391816730983	131.39944268365468	130.49645999765346	128.96077196546736	129.513846242867	123.6645165096541	126.3012742174365	119.9195379126432	135.152870042776	128.78334246221885	108.44440509044531	105.39055597050205	108.57886462307927	111.22564163294034	121.18398916471551	126.82298302216306	135.59341592429516	121.50179682681447
163.32384790788527	153.15255340971999	158.3694706879005	159.82461968245713	164.57487371707728	160.71332920339916	152.5779804022179	145.30941128661001	147.0354882454509	148.09402457221273	149.01023268190576	150.34961456229783	152.2921638356141	154.63543672764968	156.4868271736942	154.65152484987664	152.40352918104085	147.66721147265827	149.4966161253422	144.2542807698737	145.7326434368467	146.0361075520271	141.64730359150334	142.4234395575557	138.66100706463064	141.26412104966255	141.39320067219518	136.40417892360523	139.0034945794944	138.63411328430664	143.27638633365024	138.50268229626718	137.13373972067868	134.96939442828906	134.01328913468996	132.41485488296527	132.86670525231432	127.09192644664924	129.81023475552615	123.41512513647429	138.76642912774582	131.86926257148923	111.88266296610549	108.93093419997015	111.89824680123911	114.6184352634334	124.44378926133723	130.04688543724058	138.67714485464646	124.52770982453362
113.94359755065516	102.32386669952146	108.45162481689252	109.49498791499053	114.20405563810831	112.14756113926504	104.16632212406822	97.68198743077704	97.88871403592755	98.29359156600353	99.40297358519433	101.14222216923294	102.59106200400232	105.38203484435957	105.97889841668398	103.87983241369162	102.02922417894732	97.59642137195449	98.82432331386943	93.96177094256585	95.26458042639774	95.25900102924882	90.92817839619849	92.0491543667211	87.7525440084594	90.12310540600527	92.9589263692139	87.27363471400896	89.68397548681476	88.99639306007151	93.62081301901867	88.61682865241862	87.45767574268477	84.95780485107022	84.40710500819208	83.31746910678315	84.57266750871379	78.31653079681202	80.334894138546	74.17196138912115	88.39924016585702	85.91454297911464	63.442238274661925	59.7042845086042	64.5323787494934	66.48430621416824	77.1641553797497	82.91716794133127	92.54311543505531	79.39286302275846
119.84678052585241	108.70694841138794	114.52141855086529	115.71081000543234	120.44406370772792	117.78452100507786	109.72784028888022	102.97104114875152	103.66635014251945	104.29514166162433	105.34127436657316	106.951210566274	108.57101210453514	111.21969158927278	112.25109199262177	110.24469560892935	108.24410103113907	103.69097063238223	105.14108016742362	100.1257700284788	101.49663853888804	101.60694196857881	97.24312484419568	98.2376541103565	94.13255381321804	96.60136298273285	98.48217645154304	93.0036749221546	95.4890703890637	94.90950202974628	99.55687349406932	94.6166357057923	93.37841713567069	90.98969321375432	90.29070471518125	89.01776796613966	90.00809013617608	83.87899756984602	86.15361342705005	79.87501560901528	94.57409303126393	90.6231798639482	68.7778490794908	65.29824413499173	69.50153549015471	71.7385508401671	82.21926888497305	87.96630408541758	97.35123250072944	83.80016208435539
128.09439545411345	116.75897522419056	122.70968665781464	123.84119092946796	128.56535261685	126.10699515569773	118.06601904792778	111.36089517947309	111.94700839116783	112.50478652956892	113.5729251120371	115.22391710581277	116.78967618420026	119.48523241874379	120.35594534140793	118.30602637331592	116.37259459977354	111.86629892248958	113.22345427643337	108.27241872725423	109.61542402663873	109.67349617146715	105.32340342066713	106.37351535621943	102.18081689579432	104.60095686926446	106.82524750255405	101.29335592196878	103.7585265713338	103.14526848178821	107.78707531394896	102.82296101282051	101.61099645535626	99.18287896306175	98.53376263652416	97.31360831860528	98.36635792169278	92.20662826305266	94.41447791857641	88.16500110376361	102.71399850924219	99.07374781446745	77.14332076329907	73.60483618413033	77.9226868112139	80.12063515847278	90.63602916083474	96.38588975299514	105.79650929063199	92.26018961234868
133.58107281935133	122.46998694253207	128.27703063789014	129.4752038846635	134.20896645692503	131.46663038735574	123.39504174286512	116.56369725219078	117.38407675110061	118.04559130929314	119.08391986699155	120.67341282370155	122.3181766844582	124.9455255661933	126.01657429363257	124.00859759901374	122.00874769644085	117.44992554758697	118.90617957869098	113.88907590005843	115.26186312466045	115.37106183337606	111.0080185592477	112.00198408615684	107.89472553930344	110.35621478819819	112.1464322305932	106.71725136820729	109.214871631619	108.65164175546235	113.30067399073756	108.36888592019564	107.12200154380265	104.74567461673978	104.03041624141818	102.72784409628404	103.6560079746934	97.56378669203535	99.88563564192548	93.59135363305049	108.33819591527448	104.00914882783206	82.42541321298468	79.0076352813684	83.03727041711974	85.35917127462783	95.75859895393775	101.4941430846387	110.76843361221343	97.06221529785418
110.67571357317226	101.67161251881923	106.08988556766381	107.81972315304672	112.54429247512228	107.71776780011162	99.59049795182688	92.11793274410796	94.44134908136193	95.87185641917108	96.65197419571086	97.74648593917155	99.94852949177212	102.00769805885523	104.66878862609715	103.09286177003031	100.53578019985288	95.63968687337754	97.9306630387915	92.45464904218615	94.052368535239	94.63107880585483	90.27432694594637	90.72514125645569	87.54463622513018	90.341439126465	88.53283554174732	83.95865310066893	86.62287611828293	86.45828794440874	91.03324369388119	86.50016404438955	85.01131302094026	83.13253103455925	81.9055206343208	80.02288164583646	80.06387753512824	74.62829649061966	77.70592455750729	71.31637694823667	87.13570169493963	78.40010677605179	59.65020468173479	57.336406503158564	59.13377711292146	62.13134995685732	71.38332074713885	76.86208347922998	85.19497199110643	70.9891905446127
118.85776431553865	109.51408456496698	114.16130420030854	115.81531465097639	120.55197012474716	116.00390281592439	107.86997777446658	100.46166331545484	102.594507903536	103.91571918669483	104.73668209266198	105.90533918409666	108.03240250529545	110.1774664106307	112.60862170825605	110.95887731748765	108.48405671604282	103.62679551402199	105.79058677833902	100.37154103545778	101.93793020801284	102.44034915614783	98.06596627019783	98.61005433327233	95.25782890807456	98.00746762237654	96.76414747413591	92.05461334023697	94.70240927923275	94.47578630879299	99.07721832007358	94.46619891896924	93.01057571136036	91.0434949641787	89.89518436972062	88.09670003180624	88.26881355185147	82.71637917089906	85.68686072143444	79.28225956143099	94.9944188784541	86.84526420504325	67.62984313052596	65.0952949612216	67.29657062216504	70.20355859559076	79.66779864551653	85.19541759093963	93.64724681834693	79.46536184638693
123.40214182367451	112.85185134001394	118.28316496671127	119.63789050757	124.3860872307939	121.04796482348806	112.93677222847305	105.91343628805	107.13766979880005	108.01469907277931	108.98542450184688	110.44430970943517	112.25022586141456	114.72912936789469	116.25446788319778	114.36323762977761	112.19363915129706	107.51848397017035	109.21986058730084	104.04658842017933	105.49031499388157	105.73483688548545	101.34950731123381	102.19422788644877	98.32750275892724	100.90146108374734	101.697934386325	96.4719978599489	99.02733905038893	98.5701991118774	103.22206640318116	98.37550464561917	97.05504104933755	94.8021909831883	93.94204568871098	92.47544949902127	93.17474761197873	87.21993254699582	89.75705826104918	83.3942430763505	98.53089091445885	93.02574556258114	72.007345468462	68.83231432503021	72.34920370467727	74.85420457641546	85.0385963772053	90.73850370785647	99.81570311295664	85.94594645359847
131.03681230003724	120.40774074719353	125.8974803099412	127.23121073823684	131.9781409460512	128.69791044617835	120.58777111322641	113.56545917639527	114.77636651627016	115.63182274266009	116.61041448541704	118.08196174676176	119.87234987030737	122.36617672483561	123.83556738004857	121.92435501028262	119.78209712689556	115.12275143380577	116.78670307627155	111.637258470724	113.0702991390471	113.29188968284937	108.90912312096314	109.77906048367863	105.86926009682385	108.42216184830647	109.3481265704079	104.1092496460976	106.65980807742065	106.1914761618802	110.84390066996939	105.98598832738801	104.67432687891979	102.40507263798074	101.5631512129538	100.11270431814707	100.82561488276338	94.86337780090457	97.38175092100244	91.02466355134233	106.11459677175246	100.65251187999938	79.65321066818261	76.45604648766765	80.00158319624107	82.50460733241279	92.68951961227502	98.38752879598098	107.44570467124474	93.54996415894689
133.67961115282364	122.8893389208076	128.48638078944384	129.77588835036596	134.51955129309616	131.40954369700876	123.30923892593239	116.34150638528438	117.43516958155972	118.22913719305186	119.22723872846188	120.73655692340272	122.48116582812077	125.01805058914509	126.35835356514579	124.41388866077048	122.31907267707247	117.69167951481906	119.28675323103636	114.18020508119714	115.59355321350752	115.77713363958166	111.39964037947821	112.31176354729904	108.3334976794856	110.8555977619179	112.06398342796133	106.76490036577806	109.29962375455811	108.80084818089658	113.45367646637446	108.57025451518665	107.27915498361347	104.97420514194924	104.1731801172276	102.76919274310158	103.54848580402873	97.54441782485812	100.00193501926738	93.66217360764756	108.64626655529176	103.52455243213817	82.34914716586341	79.08079635069772	82.77648598732935	85.22714737215327	95.47960162859027	101.1902760122706	110.31049588474072	96.46039886721313
132.96956450645405	122.60727278726274	127.92543107070895	129.33038373475313	134.0802275388427	130.50431513867676	122.37942714386179	115.25034321380686	116.68943260679016	117.65145421015733	118.59630235996892	120.00058025895164	121.87001932728779	124.28721754093213	125.97079622404064	124.11124115252926	121.8973574752131	117.18962636890278	118.9606169070839	113.74800146519526	115.21094424756178	115.49011296083526	111.10228769287929	111.90713033861182	108.10329175634219	110.69863373974769	111.15795531127971	106.03546117792227	108.61229710971539	108.19704552034118	112.84552200638957	108.03381456834359	106.68873345296599	104.4804028719329	103.57115210343837	102.04062766259129	102.62833834203835	96.75114319912628	99.37588508977137	92.99469049613377	108.24681298361301	102.12753666435563	81.53037236357716	78.46595413860331	81.72101444201054	84.3269462185223	94.36156649161282	100.02649535763932	108.93310219642866	94.93267604894125
136.39485622769044	126.3359331689864	131.46118913124724	132.94413113259571	137.69396287996412	133.78813674833629	125.6535453311047	118.40957868654452	120.1063513985236	121.18642836663145	122.09289664052221	123.420613720641	125.37688236839335	127.70619254091821	129.62668342043844	127.82502670768676	125.53438655208225	120.77728959503456	122.66417594101155	117.38697687759179	118.88132836694346	119.22292478662715	114.83342351628959	115.5667514423873	111.88125051019405	114.51978720185748	114.46428741476556	109.47845165331982	112.08163494409281	111.72573338561428	116.36504430624461	111.60929673834413	110.22882649806341	108.08989987141511	107.10771844613478	105.49038814085158	105.93713146807707	100.1633753020831	102.90232144295653	96.50343991585986	111.91447266657072	105.06138471492548	84.95707842629454	82.04364558128783	84.97219265531538	87.68742371801424	97.53480686839627	103.15291011087304	111.87145235338379	97.77110115210051
130.14198941421398	120.49695303978487	125.35037205560494	126.9344549471613	131.67886318789823	127.37701922912724	119.24049557028945	111.88488169872473	113.86257947205023	115.08773480449892	115.94406465643216	117.17623063336615	119.23667961151682	121.45531533682517	123.67902517620966	121.96224379019391	119.56593376950177	114.74841379071904	116.79383269719217	111.433137676998	112.96919636142938	113.40066290245778	109.01595120811452	109.64471772519371	106.13965630946382	108.84058071431298	108.10076639127878	103.28214928595096	105.91351552840372	105.63338777271558	110.2535122466097	105.57857805629325	104.15383046471274	102.11142003066902	101.0337084263993	99.30938460181581	99.58954067027625	93.94687554265161	96.8232396097352	90.4152632000468	106.01005979911248	98.3415449898462	78.79559373920969	76.08804412072293	78.6053921484894	81.43817391814027	91.05603536873062	96.61663064699805	105.14675501010863	90.98032313511418
123.9788911862152	115.21165228439946	119.49868120990884	121.2810801760277	125.9958712255655	120.88844460927548	112.77829313094682	105.20784200775735	107.78594395661727	109.30702884781385	110.05579019124235	111.08288918476038	113.35093695307653	115.32981789900298	118.16366949161747	116.62305029612128	114.027880993355	109.11207551471796	111.46511782981638	105.96631363499668	107.57760407726259	108.18522569367153	103.8355153905051	104.25206677828866	101.12703493009882	103.93238208736165	101.79668747221722	97.3628741060476	100.03791770407788	99.91728518749485	104.47137879682082	99.9897488105611	98.4826597406965	96.65164798996327	95.384675984714	93.44775266236807	93.36817443288227	88.04748669444261	91.19306542198466	84.81661606937168	100.67486563753917	91.27886063560872	73.15456350877663	70.92025699244725	72.51147108728686	75.5769129129785	84.59964596278202	89.99249362428243	98.03927639534187	83.78661958622371
154.14211996622305	144.99151138994043	149.55177174968682	151.25130794579593	155.98244633864033	151.1284888232319	143.01006268739846	135.4716769276425	137.9124131426776	139.32381616004025	140.1164733084293	141.2170974663175	143.41309036429968	145.47690850323988	148.06642163889128	146.433564862048	143.93857745630336	139.06526269547368	141.26575772981505	135.83465994604538	137.40850571491399	137.91966487031473	133.54560594908358	134.0803961127059	130.73311154558712	133.47470213668717	131.98605952261514	127.4245022314507	130.08515475984677	129.897885385269	134.4846535965832	129.91217947831228	128.44174055664945	126.50685123370613	125.33030912462822	123.48276839868583	123.52814645730763	118.09126218560728	121.12504172418011	114.72522169923123	130.4688316227598	121.56364028689464	103.06366182488398	100.57476347730693	102.6050721260996	105.58742045925757	114.81270931422691	120.24191520178267	128.32262926390194	114.0686615033837
167.5889871400976	158.3562287653407	162.97801607970408	164.65935567819082	169.393484820204	164.58511554378242	156.46616208481282	148.9285627515926	151.35386748271424	152.74378440007726	153.545309351412	154.65968031392737	156.8418510295854	158.9214634592289	161.4595906082454	159.80527652379976	157.33443718995153	152.47163442954377	154.63657869119416	149.22278596338418	150.78758067913677	151.27574602989435	146.8975310005792	147.4598690157737	144.0612941132897	146.78580769483656	145.4377046765955	140.8551096799366	143.5126207210731	143.31191082229955	147.904634617719	143.31383873457642	141.8515646873576	139.8947440474144	138.73802428475307	136.90888151473223	136.9760373118843	131.51994763119413	134.53097922998228	128.12823326860288	143.8415854059555	135.01074998653687	116.47088834362778	113.93260011189905	116.04490613316251	119.01263269755843	128.26761283986514	133.6990334939573	141.7659311533552	127.51040235293158
135.73463013621478	126.98843120646461	131.2760908776022	133.06367061911098	137.77780599780394	132.60597101602994	124.50305341019465	116.90282375798749	119.552809332598	121.08789256003944	121.83289295280747	122.84771169697875	125.12768418032856	127.09102711478565	129.94651990086948	128.40203142549706	125.81081286907985	120.89512667272626	123.24314424798597	117.74783839006929	119.35732424474867	119.95754308590716	115.60490716269761	116.03143736459361	112.88351777291729	115.68048549536303	113.54548256207984	109.14068741320376	111.81694828869364	111.69998522346346	116.25263327320194	111.77268352578069	110.26573361541143	108.4320983478428	107.16778816206568	105.22813747008381	105.12825350449864	99.8275471112363	102.97601368840746	96.59880566707871	112.451583587418	102.90527625922843	84.93611085624151	82.67525541697398	84.28792555912476	87.35944618165587	96.34036526006388	101.70662419534384	109.6471448405432	95.38929403598894
137.61336542380482	127.86379895998148	132.79146646944957	134.3507588937565	139.09717523551845	134.8730930011535	126.73631873509531	119.39197903988281	121.3306436056686	122.52464756374766	123.3926509699471	124.64477751863116	126.6837541969823	128.92553268458727	131.07814171759188	129.3365484412273	126.97015849508489	122.16794535068209	124.16949483703532	118.83194443352399	120.35643931843966	120.76101048429977	116.37387418085463	117.03417596154081	113.47248132255572	116.15305089259844	115.58880863108357	110.73923725521036	113.3649478926073	113.06728933034256	117.69274788275179	112.9970031403408	111.58322118533414	109.51518890717273	108.4622654492574	106.7625555457784	107.07420864132048	101.4066247510375	104.25220033086177	97.84502690790355	113.39365656509153	105.85458048865775	86.23979886910435	83.47759974491731	86.08994554724183	88.90203408840821	98.55742193638272	104.12386594899742	112.65956647396688	98.49049262064541
141.37979585684067	131.39397182852707	136.47647079262293	137.97789038177652	142.72724604191984	138.73039979574898	130.5942971904376	123.31346002076302	125.09157581298376	126.2029068733944	127.09946120361138	128.40611963423504	130.38561782744415	132.69066705154893	134.67000604499205	132.8801510585119	130.57409322550888	125.80648897675766	127.71780846739068	122.42804770921923	123.92877806828956	124.282349147584	119.89296731959774	120.61238059394876	116.94908836179584	119.59404462590672	119.41782591193697	114.47304022871441	117.08277463862164	116.74216576546725	121.37840326736321	116.63698979926667	115.2483201204064	113.1258566132479	112.12691639598357	110.48768546789327	110.89368318261087	105.15175248071644	107.91986898100123	101.51805998850897	116.9621934977084	109.88626664521907	89.95410330589137	87.07810498871184	89.91866805303415	92.66526195291861	102.45053153049209	108.05032397783185	116.6951694564484	102.56145258421297
143.14285740198991	132.863044302269	138.13623837888156	139.56299603865168	144.3131544152419	140.6174025327002	132.4870154281299	125.29900534228496	126.85778888098743	127.86107134153795	128.79366537533716	130.17053027213313	132.07111677081835	134.45723425400482	136.21302552852762	134.3646324598625	132.13505401907713	127.4144810433936	129.21190962368354	123.98550590110662	125.45551292598589	125.74615546546231	121.35779883926139	122.14914192653372	118.3652333525074	120.96506892329508	121.27894743744842	116.21230498575959	118.79907649194637	118.40365431572813	123.04976575337346	118.25437611096662	116.89870633245725	114.70975746917077	113.77963883695656	112.21938203331365	112.74906929200496	106.91470583241214	109.58060313866484	103.1926367283654	118.49024607452112	112.04049214264069	91.69631242900424	88.68251063930973	91.8097978597386	94.46659005550498	104.41387839008027	110.05465654320595	118.85018495486517	104.78051190041501
144.90466946128214	135.484601016595	140.20833011831698	141.84597750821902	146.5853345608315	142.01450938821077	133.88379206006024	126.42987523791841	128.6442136152093	129.95923257374972	130.78571430902184	131.95465485862064	134.08120335503745	136.22575518447977	138.62135840167343	136.94041444172348	134.50093619928785	129.657193231294	131.7713937038988	126.37918539610978	127.93209251162776	128.39726988585738	124.01619135092052	124.60534941366517	121.16485351761477	123.8814417647583	122.79780893832707	118.10495101203762	120.75147443501987	120.5153847171682	125.12126728211402	120.49258758825485	119.04630639401938	117.05247794585499	115.92923594530234	114.14565108522088	114.30931413170613	108.76664797898606	111.71976624874519	105.31322353316918	120.97990861516752	112.68130894301375	93.66808346512678	91.06149813797653	93.34286029144268	96.25362956791365	105.67640797098467	111.17186948634715	119.46740386425829	105.2388391553348
147.14859942984268	138.06441606415362	142.57686568872944	144.29104009806946	149.0196477167131	144.12260417372906	136.00531992399763	128.4623677132989	130.9243979060135	132.35444707484268	133.1396537950125	134.22795079601556	136.43623761222878	138.48579253063747	141.11781123017585	139.50119180065406	136.98812146873044	132.10685659605286	134.3344158246773	128.89063206023485	130.47125520564197	130.99951488196928	126.62893393638352	127.14309219527615	123.83412959847	126.58769288336843	124.98762322656165	120.44656871172039	123.10984329878613	122.93379297441585	127.51546556122156	122.9580044512661	121.48113190661995	119.56368109547402	118.37158160201032	116.50888080741221	116.53400602573211	111.11538031449712	114.16801634124154	107.77102872550238	123.53690908770159	114.55319042996075	96.10702165510006	93.6580243399635	95.61962685523424	98.61524236565957	107.81014178190851	113.23434752110735	121.31301219144663	107.05952092182469
154.543397945344	145.0087234469584	149.8130417604122	151.42418863983076	156.1665617126303	151.68064906087287	143.54846759924837	136.10743373531884	138.27622420694902	139.5572852924257	140.39667906445587	141.5878945539681	143.69121616324676	145.86168656709233	148.18050084106673	146.47274496502794	144.06472808340212	139.23637890822104	141.3041443151818	135.93539219048395	137.47633003839505	137.91308571170168	133.5284959301811	134.15117405553562	130.65017227694173	133.34604035952844	132.4513253715516	127.72220414333762	130.36317690864837	130.10786521314856	134.7207165831986	130.0683418921989	128.63350271894973	126.61159923920354	125.51465708344475	123.75745310257777	123.95689465505322	118.38411672564396	121.3043608366982	114.89655180621462	130.51862196172584	122.36995717678919	103.2624533683948	100.59624662252388	102.98342535913982	105.8711278246094	115.34244211940101	120.84721702477914	129.15636061477304	114.92778417909996
162.00248964819974	152.51932443021525	157.29613016547336	158.91957454351066	163.66080717902096	159.1062725373129	150.97659556051988	143.5096963952518	145.74103292759244	147.04373791640356	147.8761011473948	149.05171331757694	151.17123531873645	153.32324290526716	155.6824597992329	153.98167012701003	151.56515620102445	146.7312127338517	148.8129027968544	143.43804835948424	144.98230597955464	145.42512031199794	141.041062223034	141.6566850888701	138.16637425986698	140.86411651117632	139.89498825459754	135.19759061202362	137.84204297426058	137.5968648664966	142.20639929302456	137.564346137765	136.12485041927076	134.11320576671275	133.00671105890814	131.236172427589	131.40728162621073	125.85924717699555	128.7966827682714	122.38926409448908	138.02583844405558	129.71884598516147	110.75001498213165	108.10366336961206	110.44069348502778	113.34604634047777	122.76883515457041	128.2554278303287	136.49727932857238	122.257411567543
161.29810044931833	153.02320114079282	157.03829432046732	158.92526232662024	163.61493060703958	157.95063597386024	149.89860413608346	142.17058832187703	145.2204013727629	146.913574432085	147.60008339014882	148.49447835313546	150.88710782206263	152.704534812244	155.87962253476587	154.4131743119693	151.74187644002865	146.79183413405568	149.26734598260035	143.72678031679823	145.36380730323813	146.02992877898123	141.69689454904864	142.04418265772912	139.0337813309771	141.85718224218067	139.09487028370384	134.93105473964928	137.62104910431367	137.58307391016243	142.09079157242323	137.71342264901526	136.17370655227188	134.43509119538322	133.0945032949678	131.06130406868266	130.76572558734853	125.66192809561613	128.92325131851263	122.57894661426324	138.49383357001975	127.94081939815109	110.94118959131634	108.84124485864562	110.09982924392821	113.26387129710481	121.87814256479628	127.09860028286856	134.59211938828506	120.3722777916576
168.04750144918444	161.12496917556206	164.30707394748313	166.44947129726282	171.03706468615707	164.2503120484273	156.3774786565717	148.4685443636067	152.35309476531532	154.43385223714705	154.95966593808504	155.5471113133523	158.19838606348955	159.64120440578853	163.63514066344092	162.4256737351445	159.522501361592	154.51141407871557	157.36144783843395	151.71907842815585	153.4303714911584	154.31522602624625	150.0875343836315	150.1587317612458	147.67087596300897	150.58327191791952	146.01479867647006	142.47151304423895	145.16996955993568	145.3467836578843	149.68793736587858	145.64255496696447	144.02173864807696	142.58666517031813	141.02722557905724	138.75510276908952	137.97843432883843	133.41987720707917	136.9593907908235	130.78394569057997	146.7368957566102	133.9817136184009	119.3695427826871	117.85217840436827	118.00963995699055	121.36943068564543	128.98118865249722	133.82619223781415	140.3827956939445	126.43593515963352
182.23959981375634	174.8789744979125	178.3414915036149	180.40575032480274	185.0312449608855	178.55973518761328	170.6301788353866	162.75861688993524	166.41363637740602	168.3760383757162	168.95380477273412	169.63607583201426	172.21197080455744	173.769684212745	177.5118839136299	176.21281265190387	173.38558413445824	168.38822915992415	171.11321512491168	165.49876041108334	167.18643309240682	167.99389381933372	163.72118733737287	163.8929960697868	161.20738340623618	164.08957466394395	160.1293798219243	156.38908998576255	159.08915429877536	159.19515984317545	163.5983101739115	159.43493801472343	157.83938846562293	156.2957392017136	154.810770878691	152.6158970415804	151.99209091327688	147.249399455989	150.6996648292007	144.4521359344161	160.41967273214635	148.31506065148645	132.93011869243887	131.18117667752296	131.75355022304052	135.05277295839187	143.01154179841902	147.97596058344718	154.78744343879387	140.74978960526536
181.0935517678618	173.27157167446583	177.01878001814967	178.99608166632345	183.65664361655945	177.56432698509497	169.57248005709863	161.75870760709836	165.13569523070208	166.96734837537792	167.5995653414112	168.385544330491	170.87433600573172	172.55889037208235	176.0230908863937	174.63596137597352	171.888313188867	166.91187187131993	169.50882970754185	163.92969693025145	165.59187146227185	166.32433297335433	162.01622752020504	162.28240645979818	159.41841877343094	162.26921020636644	158.9217141742078	154.97314308400152	157.67046274990435	157.704015323908	162.16346446272516	157.88780402336837	156.31979491106932	154.67349843056095	153.26274908069402	151.1483837786573	150.68536838613764	145.76044890705347	149.11712668587026	142.8136349989949	158.76572194082993	147.39354836982477	131.21943328920037	129.27633855368555	130.21483607611214	133.44895821165173	141.73959511053883	146.8290288775323	153.95122808783114	139.8167326694232
168.7181983784173	160.3353068083793	164.42346778445923	166.28857910679665	170.9846369698201	165.39746562027054	157.3388003936222	149.62277750332	152.62156921488008	154.28368299924574	154.98288973008414	155.89971138837944	158.2719845947396	160.11582277915312	163.22390174858631	161.73350087077964	159.08620546758007	154.14471157894678	156.58268209992852	151.05604879850623	152.68457732869695	153.32743291897214	148.9861724068265	149.36245464559192	146.29707027628473	149.10735974094584	146.51363101133413	142.30689235373518	144.99442812918076	144.93799013634583	149.45728842778252	145.05302501535834	143.5219822208909	141.75544051110262	140.43722211348998	138.42698876535607	138.16931222157464	133.0262294965744	136.25950703128197	129.90433914379184	145.80152628362328	135.4090199903738	118.25630564786961	116.09306792803919	117.46519638626447	120.6082604182387	129.29492591210277	134.53513121465207	142.06694349126093	127.84242804805687
173.88231204228288	165.4078327833161	169.55680915579083	171.40311540785015	176.1043261700155	170.5868658360477	162.52205426805904	154.8179273070837	157.76949931768118	159.4047582237133	160.11474575027316	161.05104641987938	163.4054209785968	165.27233778773785	168.3226661924044	166.81261689425676	164.18531743492193	159.25131686457962	161.65817205131722	156.14341187066188	157.7648502824931	158.38880801925598	154.04141553196624	154.44101305477798	151.33200084915927	154.13160111145422	151.67752347595373	147.4336989805109	150.11894738780595	150.04704303508143	154.5756626848211	150.1494158987888	148.62565875750371	146.83646721197215	145.53661511252022	143.54558327913614	143.32024798307802	138.1441705960644	141.3540447638552	134.99081864152825	150.87189599946092	140.62103384893166	123.33622536028415	121.12407776234828	122.58571672825491	125.71127551432873	134.45807202393158	139.71588637776537	147.2861221133238	133.05676394204994
168.23845776923815	159.40811952680502	163.77655307679413	165.54718423692563	170.26582799692304	165.08058208599462	156.98527866109052	149.35648322806495	152.05916564546476	153.58087261841663	154.33380474816613	155.35404634349277	157.62904537438416	159.59678815579173	162.41031525197903	160.8336761214841	158.27646881026476	153.37251892316814	155.67014930131856	150.19828932361935	151.7948536094414	152.35770048401753	147.99403275218518	148.46737156693527	145.22634203406213	147.9941725838488	146.04632927327748	141.64064161029634	144.31478293355468	144.18326260917908	148.74429490573783	144.23956494749797	142.7430384661436	140.87607186986614	139.6407087466535	137.72288048026113	137.6339040146338	132.3232451267108	135.44402320266744	129.0579852776616	144.8738566702275	135.2846276525343	117.39206335993796	115.03131571556085	116.7896918360836	119.84548701939245	128.837262092839	134.18213318861572	141.99912381601615	127.74493301153197
173.3000184171794	163.90327224460736	168.63236489340804	170.27620076632115	175.01531741548422	170.3522845130127	162.22744389275422	154.72282703615096	157.04889876786484	158.38603647807412	159.20695887392955	160.35773857368028	162.50284300711948	164.62535513831176	167.05055300654115	165.36241108840636	162.9307071258044	158.08740440653315	160.19344453918708	154.80775849527387	156.35785385590057	156.81197887287144	152.4290466596673	153.03149676202375	149.56199367821344	152.26426370047125	151.1708852843521	146.52297888539837	149.1727249243283	148.9438743333946	153.5477299459541	148.9229285035342	147.47578956243507	145.48144450060397	144.35899078317257	142.5671522596703	142.69450215471088	137.18508823305928	140.14965575234433	133.743288224114	149.40382454023123	140.8571913153844	122.09674985684464	119.48308945511465	121.74139173182654	124.67292000447627	134.0216201432841	139.4803442311057	147.6220801075806	133.37075576023767
168.37876882796797	158.54865484499052	163.5502764720476	165.09083017663679	169.83871028066068	165.6146499932388	157.478555837114	150.0974336977665	152.0965682754316	153.28138145067862	154.15533489151838	155.41065155261887	157.4457291603668	159.69115130498074	161.8013034496075	160.0307068316178	157.69922093470078	152.91189298415895	154.8664532250069	149.55650242335375	151.06802354442183	151.43912816959326	147.05007986619447	147.74889768876335	144.11511793294696	146.76427232276123	146.3433362406411	141.50466619898972	144.12886899205225	143.82261923094566	148.45105559271482	143.7408769774608	142.335638961118	140.24620826671762	139.21433185043995	137.5271163531648	137.8322289746925	132.17252739265848	135.00487452451023	128.59876427931542	144.10247036996583	136.45082505545653	117.00191955741478	114.20065505231453	116.84800700693256	119.66815646959856	129.28709339566558	134.83017254778855	143.24585800574394	129.03460026354136
180.01559518282636	170.49599783345892	175.30669535679857	176.92196730372356	181.6642727769103	177.1078774313182	168.97964926757976	161.4980822018672	163.75465109331515	165.0526787832816	165.88794170090173	167.0652879777091	169.18290189973266	171.33665008627648	173.67691906753845	171.9627840260451	169.5617878522134	164.73412625616697	166.79450017275266	161.43151670955774	162.97000618912446	163.3975397265749	159.0117964820461	159.64530874975227	156.12113205530966	158.80511643932567	157.90460954262863	153.21038396007887	155.8540111312046	155.60428691576374	160.21572339177598	155.56612668347657	154.13065369633895	152.10828274532832	151.01197120468154	149.2481559833248	149.41891552995227	143.8720569301383	146.80172367259254	140.39397908669673	156.011095572341	147.66702127097662	128.7581859059961	126.08900990890311	128.4537885134484	131.3588430987501	140.77191697290814	146.24841877733226	154.43738145333623	140.1895689422844
179.67768862486375	170.49109989211155	175.0910098329554	176.78307703783767	181.51583657426028	176.63905337816425	168.52508436139829	160.9624882769755	163.45137932120903	164.8610806724677	165.6562093377761	166.75557764075816	168.95282227054702	171.01429584029063	173.58877243990221	171.9391983096339	169.46275139631064	164.59599578011716	166.77059991715814	161.3532633122883	162.92013404003617	163.4114454273854	159.0335173421421	159.5923131376528	156.19787281658742	158.92176770972557	157.51581344395066	152.96446777093317	155.62459593497354	155.43255675791923	160.02189309120868	155.44000401103375	153.97428477775674	152.02518642621078	150.86167312362082	149.02186845845188	149.06313294420212	143.63089807736552	146.6553490066193	140.25370784691393	155.9752159545551	146.99443811127233	128.59447223761927	126.06784655257337	128.1447352462416	131.12617136833217	140.3345813288427	145.7455777989029	153.73673495899646	139.4788126191029
186.33491679869974	177.23081300337407	181.7823465511102	183.4930937046704	188.22304542718973	183.25626755480306	175.14838936194727	167.56038828197342	170.12101368600946	171.55990183167515	172.34473503825325	173.42286402092822	175.6412923727206	177.67731940577997	180.31073656737283	178.67502127919832	176.18277675500667	171.30771671468253	173.5069131018085	168.07885719331327	169.65155871503828	170.15555623166946	165.77959090863558	166.3234946756785	162.95417317830322	165.68447044962056	164.1617337236554	159.651377592275	162.3153125502345	162.13764522488557	166.72087705971262	162.15577879869318	160.6832624422363	158.75100008314044	157.57256993541506	155.71454018815402	155.72055256742314	150.32079463169475	153.36785192074922	146.96873734294797	162.71038191141545	153.54651092677355	135.30645191958533	132.81052583157287	134.82027886131738	137.8209253102677	146.9695677114621	152.35816295673152	160.27607960279104	146.01868092359234
149.79721166111682	140.3752246787611	145.10422170533596	146.74158957725612	151.4810756876311	146.89808236751617	138.76819757315883	131.30549470837724	133.53796236950882	134.85523669935338	135.68139067320837	136.84820313755887	138.97691639208776	141.11884698926093	143.51576420585178	141.83208589010965	139.3956794107864	134.55281784933447	136.66306948723349	131.27327594467312	132.82503749054575	133.28668016803158	128.90503778122462	129.4984331328473	126.04932881702655	128.76221082691475	127.6868148905044	123.0002981897406	125.64713973682032	125.41136596358564	130.01726392619446	125.38802081367393	123.94218447139282	121.9467547160231	120.825057239878	119.0413298391771	119.20011664886758	113.6620180318148	116.61555049866048	110.20894291761479	125.87218156407661	117.53508743193865	98.56406075768386	95.95286241884301	98.23547229565118	101.14905785582833	110.56047692459104	116.04970189695712	124.3177553238557	110.08370074007013
256.67680334571173	249.01997833786706	252.69947027060294	254.70967254988153	259.3590091432233	253.03032817100154	245.08952285175852	237.22728924917334	240.79347377956694	242.67886456223985	243.2917467771154	244.02982252502972	246.5603605049226	248.18166506503982	251.7569310624948	250.38248668546512	247.62342061470383	242.64194798296683	245.25698484366035	239.67485567406857	241.33929940011484	242.07286146700656	237.76282315803834	238.03062155508462	235.15361043449516	237.99688626042587	234.54017165107456	230.6849259163246	233.38358689891925	233.43614540669	237.88216227158992	233.6298133456098	232.0572992375244	230.42196975245272	229.00442100159444	226.87405084252617	226.35391993017583	221.4902982920107	224.8625433526077	218.56231460019322	234.5147439606896	222.79028480759	206.96763249765405	204.99170311218316	205.95193821372635	209.19501621866894	217.3892328784911	222.40696678038483	229.26250676983247	215.22376695312263
299.045451719738	292.4790877483362	295.50335802856546	297.7092096620548	302.26352178134556	295.04794274861246	287.29943118664266	279.34280453479914	283.5370664750832	285.7116579114958	286.19975718386985	286.69775422752207	289.41943844569715	290.7402452655564	294.9451850297267	293.7713201250675	290.8409831641482	285.825804371065	288.716685406569	283.06930859719154	284.78546542551476	285.6793767528371	281.45139701845795	281.5180802760331	279.02084040336393	281.9262280228697	277.15027333838844	273.77201422800977	276.46782600063386	276.6775899765583	280.9877930021344	276.9911367344148	275.36366130114476	273.9496422633672	272.3791492508104	270.0840658692798	269.21969895370563	264.76198268845525	268.3197590299877	262.1483923859944	278.1011454928885	264.81610228315856	250.71902476943376	249.111307488289	249.37216934819327	252.73394904265314	260.21963931152345	264.94128387759616	271.04333792140784	257.3302247008719
187.53922184846334	178.9292958336438	183.17126073424745	184.98949090850112	189.69798993589814	184.2752705145841	176.20359907884202	168.5132945925787	171.40566126139603	173.00227237236058	173.72795665499893	174.691619184103	177.0205864640041	178.91964094432095	181.88521458905223	180.34441947132785	177.748954062168	172.82712183862128	175.18501518234177	169.68996135615262	171.2999639997825	171.8935135801386	167.53704366483606	167.9739954037487	164.79489446605965	167.5759676875336	165.3355682868541	161.04105696732105	163.72264487348767	163.62784529728677	168.16976305696377	163.71095530507446	162.1985616449441	160.37475879122863	159.10351722353911	157.14150857439247	156.9618498384424	151.73995823945222	154.91429002012242	148.54000850324843	164.39254743231942	154.33336630667452	136.87820843607574	134.589978112001	136.18793171091133	139.2874220360081	148.11657500701818	153.395668303612	161.00415831155158	146.77123793368253
194.0710736590597	185.33869684461095	189.66077668053262	191.4530774863355	196.167630138809	190.84437277660658	182.7645213962562	175.09262350361197	177.91737618167406	179.47724085694603	180.21728866675932	181.2074445790605	183.51140173678158	185.4419868894357	188.32836480830974	186.76203768355563	184.19356510887945	179.28286935871824	181.59934598095987	176.12131737716044	177.72164216952044	178.29062576408325	173.9277855913685	174.3944627313503	171.16098428280173	173.92753045363844	171.8704544632384	167.52649426479982	170.20438562573884	170.08921090022213	174.6422582503891	170.15578538359003	168.6533036115248	166.80084392924476	165.55361811056778	163.61714930059418	163.48054402995203	158.21629480966206	161.35947925974855	154.97721620322238	170.80365979318634	160.93963161596912	143.3120941050416	140.9659596752957	142.6726547228007	145.74894596984868	154.65371653364443	159.95619063336218	167.6210948047009	153.38181307809666
198.22046006126558	189.52466443894224	193.82590712210862	195.62610390210116	200.3389722933819	194.97598503388963	186.90033144704003	179.21843764297037	182.07460295939373	183.6468237680571	184.38237435776264	185.36315313941415	187.67603779674587	189.5951921808016	192.50676710770847	190.94631237773373	188.37155641734935	183.4579119153892	185.78425759962957	180.30241305201676	181.9049375131416	182.47891245197005	178.11719334203568	178.57798127462024	175.3544660240382	178.12316167527135	176.0183174148629	171.69267847244697	174.37177478089438	174.26260360675496	178.81251960709315	174.33354862808008	172.82847869674538	170.98302170701317	169.72997111599616	167.7863206165037	167.63492666759902	162.38517450983255	165.5370274319852	159.15663020126752	174.98910731568316	165.0483395161749	147.49209363653796	145.1574299051245	146.8386623882227	149.92190927273282	158.80038010834951	164.09196499178327	171.72211398757247	157.48742454371043
204.48521888059835	195.51180846639633	199.98992567017018	201.7300034318791	206.45517907730346	201.33733228722505	193.24196300641165	185.6109029768799	188.2947092035827	189.78056050565482	190.54893415943314	191.59213380318346	193.84498360587702	195.83878093733387	198.56603210274238	196.95051062990757	194.43550794346	189.5483656837172	191.78340441269737	186.34044458583168	187.92141125207016	188.4429214692728	184.06980208865693	184.593244306169	181.25753896040203	183.9953570230778	182.2967489319548	177.85476805885276	180.5243591772568	180.3691390960402	184.94236334784458	180.40344431446383	178.9208601843044	177.01369809364766	175.8134229950889	173.92762183287334	173.87665603372196	168.53036945280007	171.611599604522	165.21699369808127	180.9859943249663	171.5195019965164	153.5518243865705	151.0985916361552	153.01034020276649	156.04016210916478	165.0902597286987	170.43895323608552	178.2230680983679	163.97300568083512
205.45912206644692	196.86774104087388	201.1071307171338	202.92959781568103	207.6373929763458	202.16958551236328	194.1050760024572	186.39910295156295	189.3350350560485	190.94107211114505	191.66400748921617	192.61931621496652	194.95623565654728	196.84444137543517	199.82624687768188	198.28393410345302	195.6899873729287	190.76786175953114	193.12410046619374	187.63059968587373	189.23984956681502	189.8298139225366	185.47198896622172	185.9137367438077	182.72344017563697	185.49990987611056	183.25461761803948	178.97815155576436	181.66041824158276	181.56826151706764	186.1089638031104	181.6519888494918	180.13938583184145	178.31497740294904	177.04450133210412	175.0803785946201	174.8889048991828	169.67879060893566	172.85532298031205	166.4808580756774	182.33110841565724	172.18949816366808	154.81883974516472	152.52068253043177	154.12560118392219	157.22797596824603	166.0351636726556	171.29875276947877	178.84431545858317	164.62235320850002
213.8842199624784	205.09322704981773	209.46104638651272	211.24105058280392	215.95854272889898	210.65965315772306	202.58022697225425	194.90647638156076	197.7258353601043	199.2713952324991	200.0177596261183	201.01702198939668	203.31237798719783	205.25318756919722	208.1049306212473	206.52220878552555	203.97123933347268	199.06718913079274	201.3576457684679	195.8913563652823	197.48525464676177	198.03684211847204	193.66967027059832	194.15753182979643	190.88375415723704	193.63773550939018	191.68431560701575	187.32578251862287	190.00198771655212	189.87702768842905	194.4354344532684	189.93444973856487	188.437663255039	186.56823361554282	185.33560014424916	183.41229573969397	183.29118229592223	178.01201390156675	181.13895722937878	174.75251343279274	190.5606588251931	180.74472295534954	163.0864891987425	160.7011691576504	162.4727291950695	165.53832902689317	174.46806482854112	179.77188383913932	187.42041927954594	173.1846739120089
214.47683152017035	205.91342999999145	210.13931167508912	211.96780601953063	216.6742718376414	211.16899440061175	203.10956238726644	195.39340326293964	198.36085853608094	199.97706338109316	200.6964590939026	201.64361905150938	203.98820891453175	205.8662290156281	208.8680594331715	207.32889172934517	204.7316211419662	199.80771934588137	202.16938976684207	196.6741303514448	198.2844566428217	198.87636709931036	194.51887705624412	194.95848824778233	191.77093460567693	194.54731322095293	192.27203565519648	188.01192724770087	190.69503275404563	190.60723427672357	195.14559803673842	190.6937497245139	189.17957363162225	187.3591964253527	186.0855057296003	184.11655796666153	183.91290037787238	178.7149455503069	181.89714322852495	175.52386701837816	191.37672686900004	181.16608842152013	163.86240588278747	161.56808351665694	163.16028889238137	166.26738948152698	175.05259251401654	180.30499128594494	187.81105317307717	173.59644554892543
217.34535029771448	209.01120887371007	213.09548151068302	214.9715897821838	219.66554333414825	213.95385692042834	205.91794748118008	198.161551513373	201.27815015900154	202.96426657452508	203.65654224531593	204.55114754504314	206.9441790793326	208.75849492416424	211.9088522402281	210.41297074200384	207.7711701116744	202.82951458597375	205.26024583141424	199.738702466967	201.36449840356366	201.9954978326538	197.64906073608734	198.0415297242692	194.93888650748656	197.73572635189262	195.14421264414202	190.98464844878325	193.6734544300437	193.62251908489068	198.1391696818887	193.73767624267592	192.20701442873286	190.43557922998772	189.12216019473038	187.10901011344123	186.82309342178434	181.7086145557362	184.94381802444335	178.5864762998142	194.4759451182794	183.87334664770466	166.93559944175917	164.73071713277528	166.1470037009299	169.29330738999323	177.9297470925152	183.1273619287833	190.483119744468	176.29782847259892
211.43472989152485	203.39168803003315	207.29255858340125	209.22722245716386	213.90319615189853	207.94819420338624	199.9428077118862	192.1446844479108	195.43372080703097	197.2051755843466	197.86325907356385	198.69319076669478	201.14408440926402	202.8800960359292	206.21324842225198	204.77457634721003	202.07610500429342	197.11432766870186	199.63358042513525	194.08057432194002	195.7257401975468	196.4084134958265	192.07946609112722	192.40866988521114	189.42261669325814	192.24610731217	189.2490817696145	185.2143492151473	187.9086531029315	187.90435056246898	192.39078851981836	188.05626094131196	186.50527948060179	184.79864522680475	183.4342428410269	181.3659416440977	180.97847312741425	175.9706947635466	179.2716427287654	172.9395926145886	188.866714499296	177.7969688261199	161.3118840649598	159.2300215068096	160.41208576574667	163.60588381529044	172.05126351033988	177.18102175304375	184.3648844156756	170.21975177963398
201.19177078234617	193.42721954615493	197.15054433739664	199.13936105106524	203.7960896824961	197.62180313176694	189.64679866740397	181.81512775331612	185.2590196587697	187.10971025396674	187.73510479749282	188.50426481440772	191.0077955999708	192.6703006583486	196.17346215795044	194.7908923126999	192.0391098731102	187.06083512110914	189.6643765373664	184.08410484892556	185.74713433530582	186.4801571337255	182.17145107751023	182.43797404057835	179.56983315573976	182.41809846399968	179.03080195848733	175.11538211368645	177.8132347986218	177.8536385051002	182.30830665552912	178.04103220404158	176.47136357170444	174.82916697623529	173.41583520516497	171.2955894450063	170.8119089782979	165.90912157240356	169.27160242126538	162.96938822843813	178.9216671003767	167.42205594884948	151.37514548218982	149.4203906923393	150.36606822367494	153.60364876146363	161.85881555141668	166.9226522764235	173.95061914324953	159.84739990321597
204.79456545683948	197.50196055367408	200.935925786013	203.01315309059885	207.63329068400532	201.0700775642158	193.1628591032566	185.2755466655635	189.00170825243833	190.98448544335497	191.5546132173854	192.218146739811	194.80972945828287	196.34234999124465	200.12811273264577	198.8347671913363	196.0027808050359	191.0039568872889	193.73619123094048	188.12071451866362	189.80922478289415	190.6173389752572	186.34382749209337	186.51622183962405	183.8254092949539	186.70511756688165	182.70416582910994	178.99967340657278	181.69976548945544	181.81277622643904	186.21028879424648	182.05612201974162	180.4590989952714	178.9192122140825	177.4321920399413	175.2320596691146	174.5878296163521	169.86770616331373	173.32250396641112	167.075669814194	183.04319910449246	170.81105866247503	155.55144103526155	153.7832304030257	154.37561613073288	157.67626672175064	165.60301015489546	170.53967437916987	177.2480377432308	163.25346246007638
218.86555570650987	210.25109723507154	214.51063615560585	216.32842512817066	221.03753877462688	215.5723380470937	207.509352647354	199.79995334330096	202.74082696768613	204.34206763442526	205.0673959574093	206.02538184607985	208.35986690924918	210.2507926814098	213.2200418978446	211.67006544669238	209.08412642024817	204.1647541239991	206.50909562786143	201.0209068682174	202.62720027514817	203.2087384125599	198.8485090067092	199.30066472887756	196.09008956174085	198.86026056216292	196.66103494810278	192.38080799055382	195.06250462700064	194.9663321622776	199.5094281171966	195.04600647726434	193.5358936169576	191.70357702959626	190.43981801726264	188.48129321152672	188.29503535619736	183.07975491234873	186.2493075959273	179.87256364630602	195.71491539489588	185.58200143488168	168.20940055205475	165.89133349098086	167.52777391266937	170.6256849357767	179.44157498904912	184.70343463691074	192.23130019089388	178.01345788449626
221.45672321113236	213.15884743665535	217.2222660926994	219.10584527624175	223.79773129908082	218.04919149278848	210.01834680577898	202.25426337548396	205.39884280737817	207.0963525780373	207.7842938804358	208.6700173399161	211.07114316734504	212.87450559761834	216.0486682383632	214.55878767358598	211.9109268258521	206.9668443757878	209.40708551696224	203.88219491337114	205.51002408879103	206.14599381479948	201.8010037661006	202.18754644170104	199.09521012391326	201.89416499441927	199.25719186567838	195.11490801284506	197.80450661143226	197.75919819898095	202.27241032786014	197.87849333783188	196.345525391369	194.58094646473336	193.26210461636592	191.24249593079935	190.9431972352691	185.8425082986424	189.0853257331468	182.73040637643646	198.62415720576698	187.95410958040353	171.08139583668842	168.88729997830012	170.28056072960146	173.43251030973488	182.0445014099099	187.23166405340268	194.55568686922368	180.37786338241898
220.4401148454016	212.7109566442979	216.4215711924445	218.41751108827773	223.07188184042099	216.84166198580164	208.8790890099411	201.0354998224781	204.52482024276867	206.3874145460051	207.0086595699103	207.7669572134332	210.27999748330163	211.9279822945211	215.455537958683	214.0746932141404	211.32140255331385	206.3422273760066	208.94815033747324	203.36781553790397	205.0309495527363	205.7628369433531	201.45300885905107	201.72174116358877	198.84679752289387	201.69240717824206	198.2874158370842	194.39312686790507	197.09126208867477	197.13539964055605	201.58748165504556	197.32438824618845	195.75404812824775	194.11289328789329	192.6991447771973	190.5761347360665	190.08013681178068	185.1904569474095	188.55533270572124	182.25306243163917	198.2048850408751	186.6245534696951	170.65760622483427	168.69059132768209	169.64867536853814	172.8874230840674	181.12267602746425	186.169565444659	193.13184756631023	179.05240749627842
227.20793749728287	219.68129181944178	223.26985909624372	225.30423222805825	229.94339928002867	223.53891339786492	215.6069423639286	207.7376014719421	211.35316396946857	213.2729668659588	213.87060632352387	214.5830513732442	217.1347613369867	218.72603614058306	222.3762522640194	221.03250361482367	218.24531070673015	213.25673494000645	215.9166424903312	210.32082486730118	211.99475615505045	212.75744055661139	208.46096629745765	208.69157556809844	205.8873127209518	208.74592180228458	205.08470390221981	201.2809258564432	203.98043585199352	204.05513206551925	208.4838923178047	204.26741867944023	202.685454441208	201.08605827601158	199.64183217988736	197.48524034071534	196.92103740571432	192.1077756527029	195.5113809605162	189.23020341439795	205.19166851142526	193.29341125973266	177.6596739594427	175.7643238487745	176.58355238072727	179.84869109344615	187.9486341641546	192.94076541784435	199.75861394182428	185.7287197737395
227.43133039933107	218.93599172954748	223.12459386232075	224.96751542770502	229.67054229579583	224.08855871162538	216.03903581839342	208.3046307345366	211.33260925979548	212.97152152790207	213.68261189498546	214.6120624228759	216.97318437264335	218.8293178792938	221.87759161454176	220.348584556083	217.74069965666834	212.81196773484194	215.19038981575244	209.6890634870082	211.30298222358712	211.90295902876272	207.5473900041675	207.97756797007037	204.8055808218871	207.5848628304696	205.22691783116255	201.00148015117114	203.68645708162103	203.6093452364046	208.1417344619092	203.70342766228288	202.1849163931065	200.37652257159385	199.09313794558128	197.11187806677106	196.88142435104987	191.710361374073	194.9071545039229	188.53750852909096	204.39914316653665	194.0473243707691	176.87799561139357	174.60101817341246	176.152778713206	179.2712407192192	188.0084067757217	193.23915643232982	200.674730054542	186.47422018702787
229.94577317774025	220.97725922178816	225.46225380886048	227.20372753906014	231.92895687113136	226.77404706745747	218.68417306445772	211.03632451727432	213.7615872378434	215.254038154464	216.02096176026876	217.05794040121026	219.31691405168502	221.3025901377086	224.03823628461856	222.41799398964122	219.90803877935636	215.0219273921095	217.25050615576927	211.81149083634554	213.39053051851857	213.9054765188703	209.53085745981912	210.06236341257193	206.70979291094267	209.44057290016255	207.7537906185341	203.32684468178866	205.99701475864055	205.84291721692423	210.41590116617928	205.87646281180866	204.39452367474658	202.48444275070256	201.2869308176969	199.40068816908672	199.33990807997966	194.00318804346915	197.08490428382896	190.6898625619714	206.45330113268182	196.91102843250044	179.0248897901551	176.56043378315573	178.4810823429866	181.51372144246656	190.54395402296933	195.87828238262733	203.60001651189333	189.3568809867015
234.5523356630483	226.2711607278303	230.3292112165473	232.2163635180205	236.9073979166344	231.12904448485423	223.103674068063	215.33154341111	218.50195579080668	220.2060195917451	220.89182209701204	221.77179382431078	224.1782175683676	225.97405991966602	229.16077933166343	227.67130387072697	225.0230300268143	220.07838664473556	222.5195072886141	216.99473871031782	218.62255592143146	219.25762273662824	214.91209646269925	215.30004582277797	212.20376738449198	215.00090709023877	212.35440775250393	208.22377878906732	210.91374031757206	210.87056995526504	215.38257365022315	210.99078662874408	209.45738144937724	207.69348436942948	206.37425898723941	204.35278686582018	204.04600724428136	198.95297123201956	202.1977165601403	195.84296481550976	211.73636423634548	201.0178771840533	184.19390296514854	181.99564383686885	183.39094611079443	186.544546163928	195.14336886371808	200.32123803882922	207.60896880813354	193.44100671283513
241.31810349444456	233.2983753879682	237.1967698703136	239.1364659619997	243.81121383852562	237.800786577741	229.80771139550384	221.99506841332234	225.33245649229698	227.11377025045078	227.7689081302255	228.5893194242565	231.0488584109167	232.77182247378846	236.12364160557226	234.68280159505179	231.986487147082	227.0246494615601	229.54079649935707	223.9898001165499	225.63380611232768	226.31136743642875	221.9798635163649	222.31621374093552	219.31363187776637	222.13160950323987	219.138137163568	215.12245395424333	217.81707735952608	217.81467308320333	222.30009339826893	217.96632705457353	216.41567236255295	214.70631450829185	213.34443066640463	211.27566258739947	210.8780642637371	205.88067215872533	209.18128524980364	202.84768134638568	218.7719725994184	207.62378714449378	191.21757573281747	189.11550249618682	190.32231334491016	193.51584874493858	201.94542352077116	207.05796817853982	214.1685837863889	200.04750196680973
249.09847584086802	241.24070266139492	245.04164224429388	247.0131657752263	251.67698442693035	245.52214852750703	237.5518527058115	229.71558599993563	233.157235700308	234.98559463180254	235.62182059165917	236.4052204187075	238.89703349802943	240.5743572398122	244.02691037459653	242.61551625552073	239.89097950050467	234.9198585413521	237.48036611189974	231.91496017904166	233.56823753025193	234.2707466233773	229.9483442633917	230.25428000496117	227.30707819208394	230.13646967836084	226.93547518579757	222.99172277780065	225.68848404146098	225.7107459690956	230.17900355636027	225.881219017096	224.32061332238078	222.64413590806086	221.25723963834236	219.16060717131586	218.7077280626706	213.76999038482293	217.10312352229718	210.78368084441502	226.72229548068736	215.31206470545195	199.16792443450478	197.1217271659085	198.21849256442715	201.43475798412436	209.75931265820216	214.82953444697594	221.82463518859046	207.73896387855982
247.5407772636514	240.11476858551868	243.6491782805759	245.70256089698475	250.33393927935543	243.82615093816923	235.91610529128144	228.03108271619053	231.7231969448859	233.67181249806197	234.25790052087766	234.94594608975376	237.51807041621143	239.07812943222933	242.7901607148176	241.46135732781624	238.6608760622894	233.668671842341	236.349676400997	230.748547040198	232.42634575991153	233.1993460152478	228.90707912917972	229.12550307635877	226.34198735555256	229.2033627250156	225.4382407285838	221.6819984920656	224.38187076878498	224.4700599982926	228.88821296601094	224.69175363925197	223.1053099065092	221.52160045788898	220.06638387502448	217.89622580344198	217.29957731107137	212.52276829581803	215.94125994768496	209.6678476874797	225.63148438319394	213.56725712899961	198.10572048822806	196.22640102818596	197.00712274240323	200.2816508675043	208.3206041572473	213.2810100150326	220.0005531443443	206.00964240611458
252.13090334205668	245.0934288162523	248.3911150887715	250.51498177850178	255.11350585976575	248.29382638793	240.44686489381183	232.52583950579242	236.44009639675755	238.49316182181494	239.0344168807248	239.63696310556278	242.27796580869406	243.73184992378881	247.67008581772293	246.41435159777052	243.55055518853436	238.54490927829949	241.32786663295417	235.70150279205103	237.3987812540431	238.23163491636416	233.96950289075943	234.11264654349296	231.47181262411587	234.35725562993005	230.10550395277465	226.5198551908579	229.21942618718643	229.36519456283935	233.73475473008966	229.631172163634	228.02404697561684	226.5223117085191	225.0097522600921	222.7781485316821	222.05569881038542	217.42609344286515	220.9144744592999	214.68825486582324	230.65495909672572	218.0240430965405	203.18708228198753	201.45102041084738	201.96205254780844	205.28226490780486	213.06082134385835	217.91667217530068	224.37608641783817	210.4906839345559
258.2779220759684	251.1694390188889	254.51269589336516	256.6239867789385	261.22880918488096	254.4588556264781	246.6022486869582	238.68601547305485	242.56523072309386	244.5996788961967	245.14920033586125	245.76675147481905	248.39595862147632	249.8681420695106	253.76610660539822	252.4957399244507	249.64438781671262	244.6409943387078	247.40369751462117	241.7821022224588	243.47550673445528	244.29578944582664	240.02676426874606	240.18605474774623	237.5137348683383	240.39385803709897	236.238608726859	232.62235143392252	235.322196588853	235.45688001225784	239.83617519978614	235.71404092866263	234.11094480047643	232.59224130583047	231.09143270647516	228.8718722205637	228.17284213309233	223.51513969532917	226.98966709908277	220.75291937267718	236.72039656210504	224.18863875228044	209.23723613371413	207.46753787648962	208.03915895311042	211.35019568905307	219.18001641614566	224.05404502671888	230.55220462789933	216.65122755036447
263.9615282899293	256.8908284153858	260.21279770071465	262.3308959031147	266.93242804141016	260.1279528051233	252.2794352294317	244.35927094992775	248.26322097457455	250.3077941235649	250.85304081240076	251.46193528956806	254.0980602832166	255.55918430662595	259.4792421985239	258.2150615243777	255.35848578149904	250.35406207663536	253.12513726545416	247.50168566005405	249.1965909693273	250.02136755391197	245.75456753400144	245.90835948206634	243.24602049516744	246.1275649445937	241.93167585027524	238.33237803435858	241.03210419127427	241.17185523541673	245.54674837652928	241.43269529711685	239.82794738313518	238.31576354417365	236.8105367404959	234.58592128275725	233.87533040245577	229.23118535791266	232.71124320435135	226.4782006951178	242.44550293512697	229.8580837060758	214.96703029623964	213.20574026978528	213.75990145508368	217.07429784473618	224.88132718800375	229.7442896099299	236.21086621685853	222.3241375812742
273.7066283170901	266.17225287915426	269.781527700244	271.8150053059579	276.45511814432655	270.01177876560917	262.093301856629	254.2142808650019	257.8636322044867	259.78371977327424	260.3824890924007	261.0920807974246	263.64662305467044	265.2320819111707	268.8820422899142	267.5281096980362	264.75034167318614	259.76355994687844	262.4082168049628	256.8177511700119	258.48798359942083	259.2374932158051	254.93396767049742	255.18241831506472	252.34015947738817	255.18948580999395	251.59105862485026	247.79132649902618	250.4907351515877	250.5607356156602	254.99343667608957	250.76725022372227	249.18837094765416	247.57533573035266	246.14162913480365	243.99270181504014	243.43256256963133	238.61357767653934	242.0068425167035	235.71742319782805	251.6752015050395	239.7564778743955	224.13471754872126	222.19117493589394	223.08475898067758	226.34174838459768	234.45927023156122	239.4421334124684	246.19742030656187	232.19658684613026
282.5482217241481	275.24315762134074	278.7141300534223	280.79012996632065	285.41184989703333	278.7771627633178	270.8960534496067	262.99321415653264	266.7782017136148	268.76087766013757	269.3332724674654	269.9919652129006	272.58839127050913	274.11048766518945	277.8962203353338	276.58455193162564	273.7690749786137	268.7729740729599	271.4777038460227	265.87090625349936	267.5529219826359	268.33705670334376	264.04927089742324	264.2547613728385	261.4926425262864	264.35650514137217	260.4742056171883	256.77460132233296	259.47467687397966	259.5783444939748	263.984023038898	259.81061567061306	258.2192407652175	256.65287400568724	255.1857155421182	253.00046412003465	252.36634680210156	247.63188966543146	251.0666351569004	244.80177491408597	260.7671863446507	248.50882871485666	233.24857145031143	231.38346780150357	232.1266738244552	235.41103436249145	243.38080606528993	248.30295623603965	254.9009782283497	240.96192005995326
285.1085383332054	278.09749214183915	281.38920365383535	283.518106510023	288.11442786579056	281.2467599918524	273.41459085305013	265.4870864592435	269.43636581207517	271.497007266546	272.035674024752	272.63022474603594	275.2778547584157	276.72009346619586	280.67554763159313	279.4193384318771	276.55614781843707	271.55037880420974	274.3318807659161	268.70635302482737	270.40296503045687	271.2323448011868	266.9674883924245	267.116089555667	264.4619212865559	267.34409796567985	263.0965473451916	259.5245777836402	262.2240912240992	262.37084216002756	266.7396270232277	262.6363109053905	261.0295515961775	259.5248068756157	258.01472871066005	255.7837601974034	255.05616349482034	250.4316950969399	253.91827747220714	247.6890165034984	263.6560741798729	250.97910176976055	236.18152035056607	234.4229499584104	234.96617837995512	238.2840497027187	246.06049114116112	250.90457718678422	257.3095945635389	243.4523944652642
293.1191527119634	285.81425967959046	289.2878857730156	291.364008779732	295.9857690219476	289.34333034059233	281.4649356566277	273.5606187136837	277.35171181337085	279.3347280636163	279.90718206925976	280.56514194943435	283.1622471971535	284.6830093529138	288.46949549932475	287.15636315791994	284.3422178748223	279.34632861216494	282.0488518029442	276.442793463264	278.12427095228367	278.9063940482194	274.61744068510086	274.82570350033143	272.0575888094204	274.9200327074071	271.0469643069427	267.3483706758599	270.0484440465443	270.15145656703515	274.55771314936555	270.38287076572476	268.79194267947327	267.22346542647176	265.7579114335876	263.5737953366977	262.94016597616337	258.2049232586325	261.63810717560443	255.37185050136142	271.33694739808345	259.0745022097715	243.8164720546265	241.9436046633643	242.69878375028972	245.98187676322604	253.9545045414557	258.87502661009637	265.4622593459052	251.52872435374698
298.3665446528166	291.269262053872	294.6171266722685	296.73081067087037	301.33484498329636	294.5250481676409	286.68181976394317	278.7594287705328	282.6683490904015	284.7066054215126	285.25529638878453	285.8677862926996	288.50138206214984	289.96540372959896	293.87227591261745	292.5978459428988	289.75017892595525	284.74720300763636	287.50348659133357	281.88401057644813	283.5757573862899	284.38929734964756	280.1158367986053	280.2847860613758	277.59083974529017	280.46605640491094	276.33780955176917	272.72923610904456	275.42909070452197	275.5622857629896	279.94299276962005	275.81686776601305	274.21510814537356	272.68931314463725	271.1938743314919	268.9777328805447	268.27840742526973	263.6199823199163	267.0894570525997	260.847277757415	276.8148450857196	264.2557703595033	249.3221882499729	247.52154420910904	248.14009966002988	251.44663882565266	259.2850336805219	264.1504967458405	270.5990210577339	256.7242763110645
298.91876160573804	292.0599542191856	295.2623271795452	297.41807347053185	302.00053121042816	295.00594130934854	287.2039476309811	279.2643495817867	283.30315530617935	285.40345591808966	285.9248867930041	286.4857624161861	289.1597218840361	290.5593150774914	294.60166525101374	293.37239352130007	290.48681744300774	285.4772863058263	288.2949298113161	282.6616655893398	284.3647975256247	285.2147934576497	280.9609422211767	281.08376432870205	278.4780089121701	281.36746917564227	276.94578556380867	273.44047054373306	276.13911843127187	276.30693153075305	280.65676954895946	276.58820126110027	274.97446394127985	273.49879149781515	271.9691153457188	269.71679657545627	268.94273398186095	264.3738555623313	267.8840571348996	261.6723128428717	277.6369859478463	264.74684384776555	250.18739903184346	248.47332935070733	248.9305805883685	252.26297904750743	259.9441027175663	264.74578002621763	271.0391387686065	257.23405725754986
294.2760002498423	287.4295293749227	290.6231938484089	292.78104611753133	297.3623377737529	290.3614446401044	282.5603936475995	274.6204104726073	278.6636408206581	280.767075054419	281.28703383573765	281.84548257532947	284.5212723698433	285.918036595815	289.96710339311073	288.740806279056	285.85275238858947	280.8428687051651	283.6646088366756	278.0304332712117	279.73435521422334	280.5870942840877	276.33488861932494	276.45409650356413	273.85562114347437	276.74632768292	272.30516336316845	268.80505255803223	271.5035974162831	271.67354951264093	276.0214179600019	271.9566092050933	270.342073209618	268.8700278953427	267.3378621463881	265.0831410190388	264.3047813637175	259.7412453249483	263.2542631450556	257.0449596441979	273.0091380652771	260.1026619830708	245.56362102191167	243.85781041156037	244.30080345681952	247.6351116090011	255.3059813448974	260.10474806962793	266.3940841106479	252.59034253925213
260.25916536708866	251.1716254009031	255.7403011230543	257.4556096067579	262.18562337833924	257.1120682157409	249.01831894560354	241.3802491600195	244.06189166871079	245.52115588615422	246.3013322920973	247.36090883890134	249.597759546828	251.60997610639768	254.26948857842154	252.62121975618618	250.142522567146	245.27001410078364	247.45251623414876	242.03519691885037	243.60281817615055	244.089287449361	239.7098333115012	240.27500083970685	236.8611758140978	239.57187950647977	238.0727277886019	233.6074107034773	236.2734176106497	236.10014362393298	240.68223126737854	236.11711280537182	234.64581030358232	232.70713489459635	231.53493512881644	229.67375849869663	229.6487457816404	224.27882740181886	227.3299468017141	220.93019609733025	236.65748992445063	227.263742778287	209.2685446484808	206.7476021536091	208.76957978426034	211.78139156675093	220.86722636141135	226.21440478489194	233.95401306477677	219.71035741514277
265.1562609866126	256.37284475510205	260.75282532176107	262.5349871749083	267.2525829488569	261.89270327719635	253.82398491727287	246.12510650180064	249.00972153757138	250.56514200785884	251.30941169380645	252.29893724167246	254.6037551956964	256.53150034432326	259.3961744276103	257.80535677828686	255.26291584950354	250.36066001603274	252.63981022890792	247.18005750877668	248.77064879627366	249.31099242936054	244.94086558880477	245.44271701779803	242.1396631943094	244.8820827969254	242.9536245048355	238.61798522037063	241.29486242009656	241.17098188857636	245.72930842026966	241.2265820913347	239.7311851974866	237.85587231763412	236.6286591573883	234.70582646447085	234.57105018928212	229.30540126466633	232.43141163890857	226.04372185431146	241.8424029619251	231.91506705745422	214.3775725627138	211.96993851592646	213.7644803483027	216.83237153722476	225.73523538791204	231.0163770894926	238.5647139099792	224.34684252071366
278.52730785910256	269.97884786452295	274.21600142330186	276.04828637429245	280.7545360532456	275.17160819338744	267.1273962228257	259.3833296203136	262.4284336580173	264.056985285721	264.77352656271324	265.7083616859374	268.06471632079365	269.92591796336296	272.94620494979404	271.3983502094272	268.8100203232358	263.8877522415518	266.2372336791836	260.7488145413939	262.355539075016	262.93470054940576	258.5731237500484	259.0290011461166	255.80679012204328	258.5702745086121	256.3230428294528	252.0903719746197	254.77413242307966	254.68760994077329	259.2258038029441	254.7719850371532	253.2594010990016	251.43182675076386	250.16465045336204	248.19660183533338	247.97766689777464	242.79499061259133	245.9753033080579	239.5999201715472	255.4428271728481	245.10512421591397	227.93717863672973	225.6124032679407	227.239577490044	230.34760974656677	239.10470818437153	244.3300396305902	251.7163207501194	237.52993951071082
281.10738000877285	272.7471781540711	276.8681312731386	278.7395548510275	283.4355581326974	277.68396908186077	269.66017937710296	261.88545002716114	265.0494429781439	266.734477413004	267.4290219242105	268.32127430348885	270.7168085478256	272.52614143190016	275.66783375822996	274.1555361962298	271.53037389058835	266.5933444394155	268.9994353667311	263.4889813277179	265.1084644309287	265.71965484872766	261.36643975304037	261.7840051032736	258.6303940191254	261.4112059780715	258.9084451989445	254.75617536384908	257.44448812526457	257.3875347030864	261.90838200239745	257.49495116615856	255.96901628490835	254.18059720146007	252.88145538084567	250.87808932203916	250.59402210766933	245.4773392848433	248.69978697094956	242.33642921685973	258.21051439628354	247.56329575351236	230.68057870468334	228.42477065523573	229.91625491942324	233.05463616576355	241.69608888685687	246.87795600342966	254.14486938263815	239.98613383802683
285.1166017116503	277.16172536795716	281.0329940195267	282.9858927376312	287.6566484504983	281.55306338315535	273.57888801228927	265.74641397389627	269.1581607320371	270.9611987378419	271.6086184811299	272.4101198115018	274.8864945199376	276.58471430248045	279.98092918929	278.54530630594917	275.8440092623592	270.87969633724833	273.4039250722572	267.8512270180072	269.4964298993898	270.1751452075303	265.8433144327302	266.17916976960987	263.1739833968381	265.98932696150706	262.94743756655186	258.968651577824	261.66414867000134	261.66979621441584	266.1499656207252	261.8259068385511	260.27305913794953	258.5691944741694	257.2035233666621	255.1273169680491	254.70602112322229	249.73358429616587	253.04201042771825	246.71028003896595	262.63566469250753	251.34570901891144	235.08117313517252	232.97374113533238	234.1768823359104	237.37581952383562	245.76435143581486	250.84949544902267	257.85863301932005	243.7723666956006
294.95930001037783	287.11497960184926	290.9204734425228	292.8950274304752	297.5582241961816	291.3547274525544	283.3972882120466	275.5492183799397	279.0324352211764	280.8673058250939	281.501914599981	282.2781565548003	284.77645423079355	286.4433276489418	289.90807910781405	288.492179283817	285.772014713783	280.801528357102	283.3553154503773	277.79303792090815	279.44438788993074	280.13955634341283	275.8135922289822	276.1295031074423	273.1603839619973	275.9831907891711	272.8033782055848	268.8733655885466	271.57021730724966	271.59232586556453	276.0609522539858	271.76092041160683	270.20149205444363	268.51929961574245	267.13717844404727	265.0425643441079	264.58436346869365	259.6518306291087	262.98161124323593	256.6590906779488	272.59401009169284	261.12814394029283	245.03907245565028	242.96695935817456	244.0998920439151	247.31351887549062	255.63266638899404	260.68890103721156	267.61770349592445	253.5581661033544
297.99066786358793	289.93414897887664	293.87121389203213	295.8041305323611	300.481702553335	294.45538149908526	286.47073947047227	278.64888178343267	282.0084632676766	283.7831679720521	284.4423221364127	285.2653298800399	287.7229412041633	289.44717571666223	292.78150214346886	291.32484402083946	288.644008010339	283.686359833319	286.1787802288345	280.6372088415736	282.2754801164321	282.93504290146404	278.596449821357	278.9558259458634	275.90675630075674	278.7117642922031	275.81287570367454	271.7928523095113	274.48686371414584	274.47649065494267	278.9676528033024	274.6197004041425	273.0738592347908	271.3467764276501	269.9991492466537	267.94177172976293	267.55397399368485	262.54556633062765	265.83167688311534	259.4904335590684	275.4034168526625	264.2613947987091	247.85218192376607	245.7006324319834	246.9856105724378	250.16904460729012	258.6212833826919	263.72815835254994	270.78696635631195	256.6865616777899
306.35329187956006	298.51226207976976	302.3183148757303	304.2935880202568	308.9566190209619	302.74286849328485	294.78813928477956	286.9377123218137	290.4294980246886	292.2658234200456	292.90004415034656	293.6747328145615	296.1744305609934	297.8390571698544	301.30659669977797	299.8899022290813	297.1705115198656	292.20012024929326	294.7527271158325	289.19102533827044	290.8420246306384	291.5358246683998	287.2091992363647	287.52697325894076	284.5537332485223	287.3752647322553	284.19891881252954	280.27186581192956	282.96874158169356	282.99090610331996	287.4595435682104	283.15919670040483	281.5999659463516	279.9167676574209	278.5354969541232	276.44118211973887	275.98175000535014	271.0504426090967	274.3796804773628	268.05661770893505	283.99083693691466	272.5132548087918	256.4358510274218	254.35898622940485	255.498448903256	258.71164522625884	267.029378469558	272.0827323996457	278.99809923369077	264.9440035021085
300.5362110145867	292.88570610442895	296.57322983069366	298.58502426874844	303.2341666137513	296.8662602139762	288.9371418765458	281.06599830642716	284.66504326779153	286.5542226898103	287.16646890270647	287.8996043586909	290.434630113026	292.04819429543943	295.6306169265772	294.25085248711923	291.4968279265895	286.51621308508896	289.12323710776445	283.5443393404752	285.2066679770814	285.93240785562745	281.6183417726229	281.8967817540023	278.99669838248326	281.83368388921167	278.4066621521931	274.5602782628894	277.2589280615671	277.31005263462345	281.757365632099	277.5010208596779	275.93004946998883	274.2876180432184	272.875754704728	270.74875129134153	270.22696122937566	265.3644872891575	268.7318167731201	262.4274767174884	278.376846459523	266.6165911882453	250.8268684002443	248.8226556613437	249.824639803596	253.0637716528036	261.26052592975685	266.2678708394485	273.06854411300884	259.0538720432535
317.3929138030791	309.84235946376276	313.4721979713303	315.5029851344936	320.1445935784545	313.6844355578098	305.77346490337965	297.8894607839306	301.55447950053133	303.4717076446213	304.07249900529564	304.7826520094284	307.337027984392	308.9216564439978	312.56480023693973	311.2019969216643	308.4324342539408	303.44737797814906	306.0789168728778	300.4929538300203	302.16012096956433	302.8991890246605	298.5904415288863	298.8527240497256	295.9817361078192	298.8240257095985	295.2807844460428	291.47892043860276	294.1781989632668	294.2435006591604	298.6800297216257	294.44498887011423	292.8687653206334	291.2446277560074	289.81942295291225	287.6772603766079	287.1233143818986	282.29665272739686	285.68118657996206	279.3855251055484	295.3398807869279	283.42479558366455	267.79431816861154	265.8171704278238	266.7641549001566	270.01463956500044	278.15013185030557	283.12989384059534	289.8519295660374	275.8677949278338
272.96830189754047	264.3347751921752	268.62342869290615	270.43771782632564	275.1482491326358	269.64597469374087	261.59240174204416	253.86434390236667	256.8513649656119	258.45361328795707	259.18017958521716	260.1348180502821	262.47266266721124	264.3580181741956	267.3223017519517	265.758985613829	263.1869956313597	258.2716979039524	260.5960786642912	255.11768179607142	256.7187037372956	257.2840279945833	252.91922668807925	253.39152434519582	250.1403847128627	252.89650754072045	250.7634837850018	246.4934102688303	249.17483287391906	249.074881153878	253.6205287189944	249.14894249046122	247.64244545792786	245.79769738784577	244.54475578163124	242.59282426862393	242.40418133579183	237.1913451376905	240.35236959288122	233.9722561784669	249.8001437658772	239.61004184784395	222.3076483581057	219.95332602807227	221.64019303558823	224.73405570600883	233.54408991183942	238.78995765651692	246.23574880900114	232.036828609417
339.5559097160629	333.0754877035041	336.0566838003526	338.2772684448656	342.8230336579557	335.52016174689635	327.79814452913405	319.8352079196531	324.0893839027068	326.28527272482495	326.76426351040277	327.24242996096575	329.9791779111061	331.2733432085532	335.52668872513107	334.36421322833905	331.4251435339518	326.4090632902715	329.3136771574857	323.6642726168247	325.3824692952845	326.2824211852437	322.0573422536925	322.11729597789866	319.63058352200534	322.5365972970209	317.69354065311666	314.3523234927064	317.04725409550434	317.266127366194	321.56740969921026	317.58562578918	315.9558174576524	314.55142897479715	312.97507435356425	310.67237225110085	309.78648239821325	305.35460044375276	308.9197676062039	302.75351763457206	318.7044049255216	305.3070651553742	291.32865639200094	289.7212739860908	289.97386542791116	293.3388890105075	300.7869877204564	305.483076831488	311.5012377351028	297.834629853969
306.1832550101709	299.03470266320966	302.4157910433831	304.52035095449315	309.12889323138944	302.35417573203085	294.5042924892929	286.5851205005593	290.46967333250836	292.4945665523783	293.0491998403039	293.67238399116206	296.2975427577163	297.774578358568	301.6523910175689	300.36722132067194	297.5287978803494	292.5275995970889	295.26893786726595	289.6531843180043	291.34202097122653	292.1462375703931	287.8678803711025	288.0487431603187	285.33163423164734	288.20268638092335	284.1448033737483	280.51457104462037	283.2145569332884	283.3397527658298	287.72737845717165	283.58792419669925	281.9891500581035	280.45105804396354	278.96424299356414	276.7568755401882	276.07425438112233	271.3959473369695	274.8552924459015	268.6057954338821	284.57309672469046	272.0842975762406	257.0709672996005	255.24615530330524	255.90821013675466	259.2080348915281	267.0824623168171	271.96051547550223	278.43526914345284	264.55001824590596
304.2046659611158	296.8867087334614	300.3710199682522	302.4448415342574	307.0677397279146	300.4283095521658	292.55045900851655	284.64590449391636	288.43551383848376	290.41531461948733	290.9893442779442	291.6494771843602	294.2449013908735	295.7679488998739	299.54744273828555	298.23037565180925	295.41973866216335	290.4245623938587	293.1214086234586	287.5170066545929	289.19727120583167	289.9753632397574	285.6843009511433	285.8978462707251	283.11903290731544	285.97920468504026	282.1317274393737	278.42841799006544	281.1284758655582	281.2289026881534	285.63732699003464	281.457977335699	279.8682048129653	278.2949111667688	276.832883730958	274.6519701158624	274.0230347216122	269.28215037530487	272.71142217424847	266.4423164721137	282.4067464309274	270.1593548621496	254.88301153610172	252.99789558412508	253.77360939289804	257.0539083887479	265.037842344951	269.96021391892083	276.545507813002	262.61388201892976
301.81087907797246	294.84176098858353	298.1121667893876	300.2486185196404	304.8412245863941	297.929554490629	290.109004520131	282.1766857828433	286.1572457702306	288.229052686334	288.76311998008975	289.3476707692046	292.0032751107346	293.4323206743852	297.4124824378717	296.1619089859284	293.29406851957543	288.2873939864297	291.0762214645068	285.44925256732535	287.14706084530525	287.9797062151728	283.7162511749258	283.86115749113924	281.2128575116533	284.09551101971005	279.81181397719917	276.25883313473787	278.95817010713324	279.10979826623384	283.4742811820869	279.3785039735306	277.7703461970847	276.27083092545473	274.7573519056101	272.5219696496428	271.7826083409279	267.17180292861605	270.6629117531401	264.43632928654694	280.40316673377635	267.6645992489537	252.9314583280704	251.17499175503818	251.71038322093176	255.0306496918877	262.785938868525	267.61697196776254	273.9795279978036	260.1431515945876
308.9883497723129	302.11115464423983	305.3271821008445	307.47980611674336	312.06400626209415	305.07703701422014	297.27434974339917	289.3350844264148	293.3685682339361	295.46422417210516	295.987881910987	296.5522364347596	299.2235929773003	300.62711528963797	304.6595712099679	303.4255038174529	300.54394465977765	295.53498778920107	298.3459729833807	292.71423278629345	294.41605710046764	295.2614689028144	291.004853634781	291.1337542992028	288.5156468760719	291.40292529923477	287.0127329582784	283.49977727562447	286.1985785597258	286.3630095219194	290.7159538840892	286.6413807588831	285.02894883288144	283.54731050327547	282.0217591894091	279.77333384764376	279.00590755945166	274.4287349758689	277.9343166630498	271.71853266161685	287.6839496353548	274.8177586197499	260.2276373925264	258.4992547795617	258.9809093598603	262.31011769206225	270.007542488764	274.8132816471666	281.11031814185213	267.30460976853686
306.95070897635395	300.3008914558903	303.3779060658945	305.5696885547353	310.1322386659271	302.97402859454024	295.21204663353654	287.25926687190383	291.4129869637115	293.56658539595213	294.06431098136176	294.57986359553945	297.2884522978381	298.63093439155324	302.79018957230164	301.5994656455886	298.682594453748	293.6688404532035	296.53746768643714	290.8941779526007	292.6063718164367	293.4864075660001	289.2498071324743	289.33451335634567	286.8017455798634	289.70192237944514	285.0339226449466	281.6194211594827	284.31622788155636	284.5134444729809	288.83576583369864	284.8171163015865	283.19378053850204	281.7603827105583	280.20265029436416	277.92055484676865	277.0827074906197	272.5917782599137	276.1349594427371	269.95026888046795	285.9078749950204	272.7340621098096	258.5017939331341	256.8572483452224	257.1842117840238	260.5368232044184	268.0825020847973	272.8266726710631	278.977225925399	265.2410587264274
309.3453668416598	302.804524972461	305.8158272059961	308.0260631652697	312.57785421654495	305.3366979631502	297.59580753371125	289.6372492997721	293.84917224651593	296.0301304391833	296.51550359102947	297.007615906184	299.73377954462813	301.04672175161085	305.26606401663435	304.09567137688856	301.1626565360545	296.1471908782603	299.0423024484081	293.39428427153575	295.11108087896037	296.006913714171	291.7798855562559	291.84438815953916	289.350669685781	292.2563117092949	287.4596558538365	284.0924690708408	286.7880220393882	287.000566183378	291.3080605953856	287.315954369906	285.6877511555763	284.27676252157767	282.7044079496812	280.40695526101484	279.5360496111519	275.0861943947234	278.64630294259763	272.4765948959141	288.42874610564104	275.10994512845963	261.0488059503185	259.4417331833614	259.6992332795112	263.06208273627044	270.5361162301614	275.25014076160517	281.32759106480336	267.62793176162563
314.7372774691184	308.39398548340824	311.28658182007445	313.5297257484708	318.0613748981018	310.6712819919585	302.97009247063687	295.0026099864324	299.31891043616986	301.5487450866938	302.01180050942514	302.4615648250906	305.2189404984501	306.47833225840805	310.8052806025213	309.6715998697217	306.7100809908082	301.69239675552643	304.634532759644	298.9789982809081	300.7037465305875	301.62770568347463	297.4184970262361	297.4468643910537	295.02331604953656	297.93821279914414	292.91175471436014	289.6303426111541	292.32313794970526	292.5631448860174	296.84324620207	292.89947111175576	291.2628456115153	289.8922130767663	288.2939966889954	285.96947791621716	285.0394162957977	280.66410685679494	284.25379570846917	278.11201746120037	294.0514842718407	280.4745641636265	266.7233437973824	265.18303297328924	265.3171308983681	268.69750536537657	276.04182835134674	280.7006337932013	286.64461719046255	273.0141112640338
313.36043197611815	306.76882744586175	309.81194467864384	312.0136528927005	316.5704985421467	309.3647472533333	301.61529679439036	293.65902657789405	297.84597497258267	300.0142195948359	300.50542527719205	301.00824334258726	303.726450778249	305.0526696500168	309.2442807069795	308.06377041926186	305.1387877386456	300.12411990636036	303.00595711370687	297.36031213626245	299.07476718075617	299.96237135312043	295.730203328243	295.8053787496111	293.2906620468229	296.19327516466353	291.4610958784904	288.0718758959532	290.76806203924434	290.9730799557822	295.287899256952	291.282574330331	289.6568210837122	288.2342919122288	286.6694968784311	284.37976620720605	283.52480835359904	279.0549385518693	282.606411053614	276.4287479523218	292.3839460565053	279.1324288098242	264.9895947738136	263.3610621138717	263.6572299719292	267.01470928535304	274.5246555389732	279.2524654115598	285.3602128440614	271.6458396780994
322.3909998370173	316.0769816259598	318.9535747688489	321.20158838512253	325.73019031671066	318.3143058162074	310.62089809810647	302.6519783738729	306.98598897340145	309.22292587172046	309.68280715648064	310.1260989231255	312.8882421569736	314.1391306842699	318.48208332178217	317.3530089936829	314.3880144223847	309.3701246848719	312.3178913801743	306.6615813884527	308.387206824276	309.31415826977803	305.10674789105167	305.13144822879303	302.7145906949398	305.6301984629164	300.5762070603567	297.3073250668317	299.9997101362359	300.24320226565254	304.5197480105094	300.58200507358305	298.9444252557825	297.57826660976576	295.9772886444822	293.6496371753705	292.7117788656798	288.34618502699317	291.9390967922461	285.80019940828555	301.7382258189365	288.1242298734135	274.4150638734761	272.87914794317976	273.0037829806309	276.38581315029256	283.7147152572166	288.36512462369257	294.2848872526582	280.6679434908827
321.87953839810626	315.2985872230233	318.33715532943256	320.5407287285657	325.09653773206674	317.87785715996563	310.13252356092875	302.1752070356714	306.37099712666713	308.54190287232876	309.03202837516704	309.53224440504823	312.2524681208109	313.5750638228306	317.7728359215114	316.5933132829996	313.66759362297154	308.6528273267815	311.5357446272483	305.88997870525736	307.60455187011667	308.4923321442025	304.2600957811151	304.3352602448754	301.8200264963213	304.7223863698033	299.98485041720363	296.600253444798	299.2963548531953	299.50225380106673	303.816224820381	299.81220319666033	298.18628417987617	296.7642411338736	295.19920930225067	292.9089064462211	292.0516231585651	287.58441861199884	291.1363129758485	284.9586835594242	300.9139066886674	287.64825554348823	273.51904303958264	271.8879934196852	272.1871697353586	275.54465336854656	283.0515007265646	287.77594132205087	293.8707794500694	280.1637009347859
318.0983435265495	311.3473224184438	314.48853606553547	316.6630885150669	321.2354403110362	314.14684073492214	306.369022112553	298.42119248345307	302.52590354194353	304.65389770553446	305.16329746115616	305.7001046450819	308.39267808539125	309.76135055343457	313.864861852989	312.6535849618413	309.7533661616979	304.74165978427243	307.5828968496054	301.94499364803113	303.65222128170774	304.51519049614785	300.2683292610471	300.3751183670551	297.7989621304143	300.69248534189455	296.15652524771536	292.6983365732842	295.396175719308	295.57810728486004	299.91490300364245	295.8697140052171	294.2515442287669	292.79458931628255	291.2525596954263	288.98645150674173	288.18083494432614	283.649928027943	287.17505444125095	280.9746175161818	296.9368537124312	283.8984362142981	269.50390558359106	267.8145196036341	268.2220809416471	271.56323580679134	279.18104392638196	283.9520543087199	290.160261313448	276.3973194737849
319.39777743152416	312.5061324017875	315.73332599732964	317.883505616749	322.4690773809785	315.4869492735646	307.6841770474638	299.74501569797366	303.7751454447588	305.86717116702334	306.3925983337583	306.95959498968904	309.6289879092247	311.03541054582155	315.0601655848506	313.82209553725295	310.94390576200925	305.9354359172811	308.7408314533266	303.1104035835574	304.81111472160995	305.6526054338369	301.39362911616706	301.52774642391626	298.8989845042532	301.7843315338793	297.4204391917803	293.9015682563019	296.6004877414066	296.7621409756905	301.1176284404123	297.0380898931756	295.4267580285908	293.9400837815037	292.4180355024719	290.17286577907396	289.41078887135086	284.8269105931047	288.32859684734535	282.1094050734742	298.07537167376756	285.22771159094543	270.6134491285356	268.8726125470129	269.3753423194574	272.7018302901265	280.4126446397166	285.2213853381141	291.51981226483684	277.71449220805044
323.5227416953595	316.40448525028626	319.7708817275029	321.88100184137414	326.48697451692794	319.6781261604571	311.8371714671467	303.91389413266825	307.8228629114569	309.85602259980544	310.40733949055283	311.0230813638471	313.6542828482493	315.12142920625206	319.0174735572315	317.73598242960065	314.8944671700244	309.8925466929442	312.6387106527618	307.0219795887212	308.71158757827413	309.5176881695062	305.2399871160998	305.41884901797334	302.70449456257097	305.5755754401885	301.49353094920315	297.87729966382807	300.5772293631726	300.7058289054047	305.0905704981536	300.9561603711199	299.35643605766074	297.82162255254616	296.3326722091127	294.12229013974934	293.4311560213774	288.7625424366865	292.22492910778766	285.9769439956377	301.9443204616343	289.4092059720169	274.443364040474	272.6184902518159	273.27721466734897	276.5786242832812	284.4383206067272	289.3065924148864	295.7479664750459	281.8787795004374
328.9219740894391	321.89165907016263	325.20546243990185	327.3312943678825	331.92950889498303	325.04907786063035	317.2242120677838	309.2938749098931	313.2529790754317	315.30920476276583	315.850533639073	316.447017443674	319.09347118589807	320.53640708273326	324.48297046891446	323.2175455611514	320.3623480335881	315.3577845469966	318.12591865847077	312.5039912458728	314.19770792185676	315.0165424505179	310.74528501225967	310.9082343351688	308.22383597040556	311.0998811388851	306.91323479973477	303.33502445907413	306.03467871332504	306.1757371569328	310.5496422287027	306.4355560206427	304.83149194702645	303.31414658920403	301.8131391890285	299.5897861155872	298.8714821301247	294.23494973427586	297.7118895407191	291.4739642131397	307.4415080577612	294.7831850254465	279.95307076327106	278.15651038498635	278.76130598494717	282.0719138432452	289.87617880839827	294.72088484777305	301.1018177875695	287.25980691961564
325.5328531926716	318.8331673154832	321.94475066674414	324.12816532825366	328.69560484677527	321.56396196398805	313.79730484416456	305.8460422721265	309.9808040736512	312.1218388080604	312.6254994321815	313.15099788080374	315.8522218849268	317.2064236874425	321.3387547320557	320.1363312193239	317.22897199873864	312.2163111472284	315.06910613407155	309.42899510321126	311.13822877832104	312.0077207259633	307.7645053612284	307.86315015239205	305.30225573462275	308.19790466489496	303.6060209586828	300.17011579979754	302.8675029116592	303.0562613606251	307.3866437259855	303.35293404045075	301.73261467519757	300.2849897155857	298.7368263133124	296.46401002467076	295.64333116762486	291.13073279497377	294.66315345954564	288.46852207646356	304.4292396214384	291.32149970044793	277.00530299890573	275.3291893697227	275.71082455934317	279.05628649131864	286.64325082017774	291.39987457524114	297.5695192078285	283.82591483048435
329.6248573784869	323.4336543051557	326.23740037488454	328.5054827874649	333.0210761493242	325.5121608629879	317.8453040314445	309.87198614641267	314.27081191867745	316.5375216982599	316.9836531770291	317.40067548403744	320.1817934323238	321.3991877456602	325.8080924211464	324.7013987031705	321.7195123249762	316.70089871426507	319.67665693787677	314.01651702475306	315.74669531637954	316.6902906861134	312.49389051783214	312.4971820130988	310.12192800281724	313.04260088518134	307.8510253959643	304.6352443467606	307.3255885156073	307.585650813332	311.84506328729213	307.936979033882	306.2945637792738	304.95262529537825	303.3364807367656	300.9929333961787	300.01935792718785	295.6994308096734	299.3094566038115	293.18781578511664	309.11639217165026	295.3462730259635	281.82691102835065	280.3292139293846	280.382882682041	283.77469344308605	291.0251016423536	295.64086250251205	301.4755106193054	287.9049375458931
352.3686544781552	345.98666120532386	348.9106011274458	351.14762521760974	355.6833324883775	348.30171541861483	340.6017177984326	332.63420487066605	336.9429093998177	339.16298550636253	339.6310343789825	340.0879013404376	342.84039229434296	344.10723489818565	348.4143416130589	347.26916420219675	344.3167010273019	339.2995513476282	342.2260788072504	336.57318291107276	338.2950285869933	339.20762752309673	334.99030517656513	335.03426110968957	332.5780358692434	335.48797785135287	330.5382020560553	327.23929551758465	329.93291579964534	330.16475253470395	334.45311074857744	330.4939300225726	328.860237487531	327.4740941752868	325.8861015609023	323.5709301143104	322.656816614162	318.26022225203815	321.83880938806936	315.684743974709	331.63035846890506	318.1061703127438	304.27620744398087	302.69543965856514	302.89721154328305	306.26992939102246	313.6585065030196	318.3271094841741	324.27403347724595	310.6455021380382
343.65612856922576	337.66608938093634	340.3510406009772	342.6514321880166	347.1450420149239	339.4851470079311	331.8634730335899	323.88469365034837	328.38831756582573	330.7029716758285	331.1266962177836	331.5008915751538	334.3123839443259	335.47493951771673	339.99045815614215	338.9202308458198	335.9114690557418	330.89254370298886	333.9130743750896	328.2476834213802	329.98492042539243	330.95519358629434	326.7771653337168	326.74601362306385	324.4379589270953	327.3663024979229	321.95354225842203	318.82446192948606	321.51100245848994	321.79778407344344	326.02873418508955	322.16924956822254	320.5193310755739	319.216600120336	317.5763548909201	315.2076434455463	314.17660170851775	309.93114731312596	313.56799407154557	307.47508692182055	323.38578781552525	309.3657016112972	296.1548357611264	294.7179036415849	294.6589597329023	298.0657104073651	305.18875299092355	309.7474802695533	315.4421353422057	301.95052410444487
334.4115712758557	328.56772472537904	331.1624345035391	333.48572941738286	337.9628612058427	330.20472104840115	322.6120895226293	314.6309637258192	319.20412163690145	321.55338632264574	321.96047774085065	322.3041071774275	325.1366860375527	326.2608230057585	330.8523450427139	329.8107389963307	326.7812998793231	321.76286321423026	324.8184969296401	319.14968485357866	320.89240640952687	321.8847188760476	317.72305878019574	317.6627292277426	315.4132111379549	318.34805640936844	312.7597561755326	309.69475927071403	312.377948587107	312.68552738027023	316.8936475671371	313.07309299192485	311.4173696438163	310.14719290145865	308.4871466171457	306.0984965090583	305.02343985768374	300.83656336133424	304.49494688941576	298.4276891658009	314.3203038460198	300.11842938855716	287.1459813455098	285.7676996736937	285.6042603032867	289.0233276536954	296.04187929639227	300.5584825680889	306.1611772837606	292.721394400233
343.3404850489434	337.5870174986487	340.1290534429027	342.4664280104356	346.9331476419781	339.10756165922874	331.5368802550479	323.55460366698276	328.17423873235606	330.5443900665903	330.941525722169	331.26602803328814	334.11174014511045	335.21114786530995	339.8494943629938	338.82396939575733	335.783208242825	330.7653300615475	333.84000051798836	328.1696828371492	329.91521205875017	330.9188410364274	326.7655407840072	326.69053072489174	324.46978593605746	327.4074706486331	321.72420420171625	318.69792728958805	321.37905400987484	321.69820700675984	325.89332443339504	322.09441354990975	320.4356938335198	319.18249696588816	317.5123906913643	315.1132652631308	314.0133559102147	309.85944791820566	313.528740698998	307.47451396226296	323.35734245665645	309.04772597751617	296.211371058062	294.8579408379212	294.64834560236767	298.073130231919	305.03608197725293	309.52679722381447	315.06528380915233	301.6638887048446
358.0462927376785	352.13467183972443	354.7750316999736	357.08788306348293	361.5726922996231	353.85068256895266	346.24900526997743	338.2685662208339	342.81459113185235	345.1475232542748	345.562706601153	345.9201282016084	348.74338906111535	349.88406752670306	354.4408196420746	353.3839324982859	350.3655859348295	345.3468132728699	348.383228314567	342.71627095443455	344.4558910670296	345.43526267422806	341.26352830386827	341.2208059251057	338.93491920746226	341.8655380387449	336.3743473043573	333.2785198023221	335.96350959337724	336.25996248910894	340.4803405859115	336.6385279476984	334.9860614681096	333.696890702041	332.0485110124217	329.67110144674496	328.61907755660496	324.4008785565098	328.0467273065611	321.96361476748825	337.86770181360146	323.75365866246995	310.6566179438015	309.2371589413504	309.1444846278315	312.5558975303168	319.6342249998875	324.1707891680482	329.80703622046144	316.3499780703033
351.4839128175608	345.7543992050163	348.28361727172467	350.6247384556615	355.0886622801758	347.2425928147974	339.67914016627157	331.69659316916045	336.3298529036955	338.7053844264592	339.10000798784347	339.41936166065756	342.26863017428076	343.36113206357817	348.0119194506525	346.99006105694605	343.9467768446393	338.92905697372055	342.0078535576633	336.33725427275715	338.08334668480245	339.08914863974246	334.9373333195336	334.85966571987484	332.64377157687505	335.5818423481947	329.878323892848	326.8618884175465	329.5425226274666	329.86426847125495	334.0564316547836	330.2622847064776	328.6029578129226	327.3530657533071	325.68106859119837	323.2798106908854	322.17419847461235	318.027695663009	321.69905894023947	315.6470853862441	331.52820536770366	317.19166357497613	304.3865891638971	303.03545028757	302.82052410565757	306.24620006328405	313.1980331316943	317.68208619882654	323.201057034242	309.81192132160487
359.6065357576327	354.1537169156097	356.51785883419586	358.90097930136363	363.3319109897248	355.29295548899665	347.7939406523552	339.81096958060596	344.57839519790383	347.016982677731	347.38082290662913	347.6423532951071	350.53019614942343	351.5485351521719	356.33991291444727	355.36942969979907	352.29092841976103	347.2764579609323	350.41541650130216	344.74154839742573	346.49627590901764	347.5391160968537	343.4165252312687	343.289901626052	341.1719385153312	344.11913311846297	338.11203772337416	335.21525282313905	337.88853601841646	338.24690757264466	342.396536907399	338.6726834623851	337.0041494290766	335.81034627345656	334.1056562111658	331.67122082817593	330.48779038441893	326.4470101012717	330.1530315369378	324.1466693637445	339.9900532878603	325.3276385585622	312.9539023395613	311.6933721437506	311.3149958485499	314.75890542054066	321.5280108770912	325.93166892506616	331.26385643530045	317.98868898567196
426.9612701311988	423.9595476356658	424.87552274064893	427.5782278216637	431.6556389570858	422.10749647061334	415.2871215513312	407.4458130363068	413.2604475457825	416.1920970323355	416.28827592322415	416.05460875782467	419.2206514587627	419.5913904993674	425.50086666653607	424.98524961872175	421.6555422230036	416.7515920171983	420.35165604311254	414.7428837223935	416.5421286263823	417.88374959563413	414.0772682603737	413.5360038536431	412.28645285039516	415.264035355022	406.78353309498937	404.9481739408404	407.512350813966	408.1744167281608	411.89228698902605	408.82805160704976	407.1101678466642	406.41182121907985	404.4597848954537	401.78798445789346	399.9706206142749	396.8923835293155	400.82438766701455	395.3086153743241	410.5597840023185	393.42104832356324	384.8869383436854	384.4081223503401	382.6704316688073	386.20177832943796	391.31557092798624	394.96272024689176	398.62892920513957	386.5689322396674
411.00769616403323	407.87512747192943	408.8658441150034	411.5536814658439	415.65275568214963	406.1802852743255	399.3164686747506	391.46092604534255	397.2250384840478	400.13371481442965	400.24356647073046	400.03536951045413	403.18930110841495	403.59446047916816	409.4498352444402	408.91092935174356	405.59150565776224	400.6785813536805	404.25843451220436	398.6427128242122	400.4410338280691	401.76925928239416	397.94547429020633	397.4233067174488	396.1327947116433	399.11085523101696	390.7436490057821	388.85405536342284	391.42539519157697	392.07323629881535	395.8147861047585	392.71645259838687	390.9997172311992	390.2777178557567	388.3358173500783	385.673266282335	383.88493677193287	380.75889652710055	384.68330163325135	379.1418852307684	394.4299116512868	377.3999000165727	368.68068794588316	368.1705267638189	366.4867673728506	370.016818490906	375.20864332641446	378.8953187593801	382.6509074504078	370.51700772165657
387.83137820265625	382.51945207024494	384.80390016889623	387.2080599028646	391.6215530330919	383.4765563852667	376.0165890288323	368.034986241846	372.8737320430941	375.3431841599987	375.69192915375857	375.9240027565869	378.8311767406958	379.8106523991986	384.6726299464334	383.7261041840208	380.631824908846	375.61956295675805	378.7852345293221	373.1106527001549	374.86891583165976	375.92734576790053	371.8171334316484	371.6703582505423	369.59173762088597	372.5420306474537	366.4008871608446	363.56284380922926	366.2323433715886	366.607314164081	370.7369373263998	367.04522838136984	365.3729131417513	364.2029824318379	362.48488040204745	360.03642871128136	358.8175070076716	354.82501937521204	358.54501512246514	352.5574992599752	368.3840538396062	353.5667993660674	341.39079704258734	340.15960816561875	339.72545012809724	343.175855354624	349.86691576880435	354.23078513208145	359.4600442413049	346.25158991344017
343.82492626053863	339.3624946865476	341.1300004378098	343.65298918016464	347.9542912280122	339.2817622610129	332.0234407718102	324.06601430390003	329.279929650935	331.93324725721953	332.1865324453994	332.2441889796584	335.2574918721151	336.01407074965624	341.2839457195632	340.50167422861387	337.30609353961637	332.3201098901402	335.6667245062205	330.0002988442528	331.7805569126554	332.95617891183525	328.9565465875531	328.648905337921	326.90398528291655	329.87521168352004	322.7841522321374	320.32299586696246	322.96005474265763	323.44970168037463	327.4307858977516	323.9752803872381	322.2791023121156	321.2963043805999	319.47709992154967	316.9302092119906	315.47021537037114	311.8282541102952	315.64799162716236	309.8355254854559	325.47772292895763	309.70883295444713	298.94665048820974	298.04382858180696	297.03816811252256	300.5359766882289	306.6038871911366	310.7044507762764	315.3752420674469	302.5387892128334
367.67180929182064	362.6478084526781	364.75599769342585	367.20169192595165	371.5786103059634	363.2519801052647	355.8569997342047	347.88030705438905	352.8481052365281	355.3814063613316	355.69767471680314	355.8704275802187	358.8149703851802	359.7190325210121	364.72220613878045	363.83174315583716	360.7012596020642	355.69577172710916	358.9251460573853	353.25070535781543	355.01738705398805	356.1167883287106	352.0428116966443	351.8403615958133	349.8762081431923	352.8353147165166	346.3645890270497	343.65377431075115	346.3134634057167	346.72795519856237	350.80859560241714	347.196232344953	345.51487035496854	344.4088224247793	342.65497013902285	340.17140824787487	338.8693512590695	334.994839364728	338.75118290529315	332.8207442931674	348.5921690930323	333.44311747310707	321.74333942189867	320.6254027751191	319.99294998843664	323.4618491079219	329.9429043899573	334.21943455624603	339.26289953415824	326.17324660058097
369.34643887251116	363.7762692449586	366.21282122543204	368.5783671284197	373.02344713729053	365.059978527482	357.5362658327143	349.553029436606	354.2667803638782	356.67852235713906	357.0556826331044	357.34152660399087	360.21340463043316	361.26243042358414	365.99472598619275	365.00117857576794	361.9383842789015	356.9222146976575	360.03397739583386	354.3613388946758	356.1121527546967	357.137632383809	353.00081382596017	352.8975309479833	350.73204119067907	353.67481470636096	347.8062643592205	344.85771079642177	347.5344218214292	347.8763023613625	352.0452897525531	348.28933403779746	346.624970564037	345.4047805445074	343.7154536732156	341.29625065401746	340.1475707071381	336.0588487928292	339.74874036531094	333.72000886727574	349.58252047709834	335.0604939142223	322.4927247584084	321.1845452938285	320.8900890080796	324.32525308704794	331.18008092743236	335.6185806870307	341.0249653387506	327.704965756662
377.5920985836109	371.84708907698206	374.3903962803843	376.72928884039203	381.1949833579569	373.34834680459176	365.7871416738551	357.8045486368352	362.4361141488773	364.8075564560553	365.2044246044851	365.52663795377237	368.37415769354226	369.46928886549676	374.11249646398045	373.08522572303934	370.0458904374542	365.0279561112413	368.0995535364374	362.4295664656317	364.1744337572507	365.17468298849576	361.0181128703873	360.9483854582273	358.7152877884223	361.6513048751398	355.9852875968738	352.9604674386629	355.64177916581457	355.9595089133173	360.1561622845903	356.35396912821307	354.695918639695	353.4378695552985	351.7709306215618	349.3741790523178	348.2765253732686	344.118573983195	347.78462287774727	341.72504097991555	357.6120932290235	343.29992795186723	330.45125541843686	329.0771652076877	328.9000640549899	332.32215955722575	339.2991735592707	343.7885060908463	349.3071622262207	335.92029532864325
385.925195741485	380.83886706240105	382.98764128230425	385.42453986468996	389.80944716874086	381.51623685332663	374.1100530984255	366.1322344659981	371.07459931882994	373.5937868101446	373.9174168212	374.10294140652377	377.0396545671891	377.95939237042586	382.93233938884975	382.0284685843016	378.9065716843955	373.899260719839	377.1131369684334	371.4383960020022	373.2030278685613	374.2918940754349	370.20806272006917	370.02032412239566	368.02514163541326	370.98193052625976	364.593116158073	361.85317671602434	364.5153585542745	364.92020192836884	369.0129556800064	365.3808484436275	363.7017038616848	362.57898844903235	360.8344438602411	358.3597378500633	357.07785043602934	353.1739746263484	356.92095268499406	350.9746127826405	366.76195078158844	351.6887990675462	339.8708842605795	338.71838826044706	338.14481619298215	341.6087416277877	348.1452468101042	352.44207027011555	357.522000754698	344.4097158055975
400.94830311707386	395.73720230517586	397.96322328655833	400.3821909135634	404.7829827416202	396.56630743847444	389.13295447367665	381.152925586653	386.0404131267879	388.53186290608255	388.86966689894507	389.0808385152494	392.0014709405747	392.953627401239	397.86553043916626	396.93690842290073	393.8309922262992	388.82065271214015	392.00630147806754	386.3314667604521	388.09235224034796	389.16286592501854	385.06269216169653	384.90000480271544	382.85308419864805	385.8058443867378	379.563443639379	376.76797246711385	379.4345044802565	379.82186819975163	383.9363094949718	380.2690028320487	378.5938831010362	377.44255421330513	375.7140487780707	373.25499164108345	372.0097890056304	368.05366822647295	371.78435903296264	365.8122370888953	381.62450041727163	366.69617061462566	354.66783488049526	353.46304045565563	352.9805325277501	356.4360600653048	363.0665009463271	367.4014574827138	372.5602230705651	359.3977290050142
408.26777041560314	403.44075684572766	405.4378406869221	407.9114954541485	412.2622739193423	403.793635887837	396.45635640176755	388.48606342597606	393.5484434035635	396.12285505485545	396.4182591868412	396.55053627500126	399.52019103841246	400.37041068745714	405.4685779744195	404.6116682266869	401.46063309734694	396.46030822307534	399.72518813804953	394.05199712332944	395.8228459081935	396.94333135267715	392.8879113054605	392.65781146571106	390.7484954283719	393.7109042789559	387.05931925774513	384.42969935483745	387.083051354024	387.5200105211211	391.57154027953726	388.00467730513407	386.31883990369715	385.24581749209835	383.47436885067134	380.9727916364016	379.6232395989795	375.81575491733827	379.58948596827673	373.6868380169453	389.4294494603819	374.07787223502595	362.6484112090723	361.5699220326189	360.86350382438974	364.3396977562111	370.71348713231436	374.9343744836236	379.836185698729	366.84416518701414
380.9999115710596	376.46596155226763	378.28347310713195	380.7971139002674	385.1081059456635	376.4644000962262	369.19675794960494	361.2372695784609	366.42525684262813	369.06217809527044	369.3245301974231	369.3969530566131	372.40199671381924	373.175857543816	378.41239397099656	377.61291595471215	374.4275150529268	369.4378627962251	372.7649762701975	367.0963608093917	368.8743913523315	370.03581106325873	366.02071601609975	365.7338471385638	363.94340798614274	366.9124359692056	359.93042497787883	357.4318368580051	360.07302968317924	360.5498588250491	364.548300428348	361.0650984074321	359.3714185044124	358.36462714552283	356.55807704335365	354.0227440656679	352.58965070554865	348.90582367988793	352.71348974677915	346.874773109121	362.54709548483663	346.87157642351286	335.93908569455937	334.97931281439145	334.06799888232894	337.5598846253014	343.7122181720312	347.8406633068724	352.55171140273455	339.6897307259509
368.009049980478	364.09611684279736	365.54139540219086	368.1356602002441	372.3571942880399	363.3425034430686	356.2401021252704	348.315829080816	353.76596534042704	356.5289435910195	356.7225152416844	356.66912066453904	359.744415110432	360.355152704108	365.87474871477286	365.1932383759099	361.9427976800683	356.9823028283387	360.4298147351454	354.77903043992325	356.5686195029702	357.809289994898	353.8795330669339	353.4816184256205	351.92572913763894	354.9025765664409	347.26896910307784	345.0450039265842	347.65727454584646	348.213848758039	352.09860853467956	348.7893634187428	347.08281213134575	346.20864277295505	344.3359838100376	341.73776176177705	340.1379945899908	336.70943390684306	340.57729923779704	334.8732773603743	350.38192043472145	334.06520794020463	324.1545114252625	323.4177525922758	322.1227558571139	325.6379811303735	331.34172424121317	335.2724985596806	339.56426904088875	327.0071026194854
412.65804985805454	408.28360062020334	410.0111850691245	412.54628298804704	416.8346950074794	408.08147396314797	400.8627215607046	392.9118759514622	398.17232398878076	400.84097555879714	401.086583006938	401.1267738385369	404.15062991442545	404.8813211630512	410.1918073749541	409.41965481521265	406.2187664641011	401.2349928453044	404.5895378405535	398.9237743740686	400.70457661159037	401.8826478942354	397.8837835728631	397.5746960500705	395.8291168629317	398.80000971913665	391.6756661834784	389.2423249700183	391.8775254264893	392.37208453346665	396.3458913565424	392.90024556008063	391.2035574840039	390.22351969316105	388.40347700774765	385.8546635423702	384.38450541465943	380.75500926640757	384.5752325027003	378.76051307829624	394.40490949849084	378.575570054362	367.85906217382455	366.930990603578	365.9613013834742	369.45783059997956	375.52364313905264	379.6068215870529	384.2050577564956	371.425208035183
420.30457677546076	416.0268727923179	417.6979739058745	420.24583121258445	424.52039335703427	415.70573931104667	408.51447412511254	400.56908143506394	405.8714846358697	408.55955608256176	408.79471950730846	408.81538703833627	411.8503631809788	412.5553564238372	417.91023330187517	417.15567609250365	413.94493977949924	408.9652249375933	412.3376304401958	406.6740865375623	408.45666683232406	409.6461171987623	405.6589342175911	405.3342353708907	403.6210209174913	406.59318837944966	399.37414700892424	396.98193226868347	399.6130667391481	400.1192758924	404.07670222179127	400.65612475495936	398.9574837434765	397.996069985448	396.16664838160153	393.6087395244298	392.1142793457248	388.52123066732855	392.3501082162952	386.5532612856932	402.1764799378792	386.25063934987156	375.6792126258079	374.7787897108988	373.7604333385574	377.2603488035724	383.26469636542123	387.31887730569	391.8510549855168	379.11927045253657
423.9672687992633	420.09828663349015	421.52694520556656	424.1270116209043	428.3414297296609	419.2819031408843	412.20439991246616	404.28543347579364	409.758415512774	412.5275963077584	412.71806903416876	412.65654617290346	415.73657388140606	416.3341095687833	421.87285161198525	421.1947836558777	417.94289947679687	412.9832973349976	416.4321202752818	410.78127759760594	412.57081131548205	413.81037952624666	409.877934996083	409.48312448418585	407.9178223954962	410.89436966661924	403.2617264422763	401.04719375364806	403.65915288610375	404.2161384786378	408.0998403966299	404.7911620991343	403.08475334962	402.20730208498173	400.3366408227393	397.73958245692825	396.1394430807946	392.7091239857812	396.57493238963076	390.86313372000285	406.38106836872674	390.04825119869594	380.1240055443322	379.3583757860493	378.1073172169444	381.6209559425418	387.3440292027903	391.2707079894844	395.52707133252227	383.000025208706
403.4533429612522	399.76873544545464	401.0848356930662	403.7075306345701	407.89408285547916	398.7338226809817	391.70474137954153	383.79903179099523	389.3454479845553	392.15114295977634	392.32087697394564	392.22220815284464	395.3216145726264	395.8713402085003	401.49124202191024	400.8493970180372	397.57892094482	392.6302670492585	396.1148485537937	390.4719315596457	392.26432851400466	393.52835460149896	389.62479141333495	389.19478743113734	387.705521591881	390.6833645802539	382.85092398511586	380.7204631308087	383.32234007449966	383.9037887106812	387.7506767710733	384.49743927114775	382.7877333620843	381.9527334384801	380.0618325078373	377.4460913415941	375.7949823814997	372.4459626269904	376.32923876159805	370.6637478368761	386.12173334035737	369.60112097033107	360.0017900554138	359.31269243685466	357.93258081838206	361.45218148689315	367.0287037483406	370.8931663147606	375.02601907890926	362.59238388427906
405.33989611545985	401.8802569888572	403.0634011267514	405.7131686368879	409.86470519888974	400.5756293230042	393.61254136110455	385.7257912166855	391.36219360290954	394.2105591884721	394.35580423119035	394.2123204862798	397.3345806842073	397.8253410250526	403.54249289625	402.9427084156058	399.65160166712127	394.7167117751453	398.24099629370295	392.6082417564406	394.40339332598296	395.6940227278307	391.8225795208995	391.35459043750444	389.94686916529497	392.9253319010042	384.8718227575593	382.839696460532	385.42952881205235	386.03834714201025	389.84271048496356	386.6524756451377	384.9395621932785	384.15089149197325	382.23864645402466	379.603153686408	377.89535129010864	374.63734367413525	378.53831069285235	372.922886409142	388.3137419680453	371.58095739978705	362.34180162273566	361.7267612124713	360.2205668317003	363.7452127001953	369.1642859831164	372.956541482319	376.9359466662288	364.6222633585852
423.1001860086654	419.5495338829877	420.78933554898515	423.4283322768936	427.5939497176174	418.3510383786559	411.3649287230437	403.4710065205717	409.0723769604413	411.9027995993113	412.0585029212992	411.93340776602315	415.04650180907237	415.56066659810443	421.2385313906274	420.62027158004986	417.3382260793981	412.39709752406014	415.903417762191	410.2657416062044	412.05965348733855	413.3376211877503	409.4502638256621	409.0008836455926	407.55226980911846	410.5305023473126	402.58008414581496	400.5048330475074	403.10027275329156	403.69646002239386	407.52044565318386	404.30090654108136	402.589470661527	401.7781460991861	399.87639296603635	397.2503822367863	395.5689423500809	392.2676557245924	396.1598973324289	390.5183850269058	405.94419438505207	389.3054013918103	379.8924896476341	379.23386738038164	377.80013739598843	381.32216064937455	386.8213477799875	390.64637191246123	394.6870495983818	382.3260956943594
404.5925355416301	401.85069848245377	402.6099885501475	405.3412407177735	409.3754978241669	399.6951868204597	392.95117548554794	385.13767563339184	391.04888019706493	394.02782608023256	394.09510591436674	393.80988123659864	396.99933854696025	397.30275737638766	403.3186391332701	402.8534861379187	399.50206664307376	394.6190341593865	398.2639167264392	392.67287397418755	394.47381165858	395.84720072738685	392.0848660940618	391.4962832283312	390.3518160258439	393.32725247262147	384.58283609864174	382.8667135844926	385.4136520012108	386.10860253178555	389.77100745210834	386.7869847603443	385.06681021025565	384.4275201987749	382.45040903748134	379.7565399536969	377.8711514807833	374.90936771478493	378.8598177464858	373.4150685917224	388.5634995389207	371.18606395180825	363.11411303486443	362.7392930426444	360.82970898297987	364.3636393751148	369.2684162330357	372.8238122195767	376.3104502900063	364.39912645872977
[truncated: 378 more columns]
